# Supplementary material for: Map-Based Functional Analysis of the GhNLP Genes Reveals Their Roles in Enhancing Tolerance to N-Deficiency in Cotton
Source: MDPI journal article supplement (doi:10.3390/ijms20194953), 2019-10-08
Supplement: s1 [file s1]

Supplementary Table 4: miRNAs predicted to be targeting various upland cotton, *G. hirsutum* NLP genes

| miRNA Acc.      | Target Acc. | miRNA start | miRNA end | Target start | Target end | miRNA aligned fragment  | Target aligned fragment | Inhibition  |
|-----------------|-------------|-------------|-----------|--------------|------------|-------------------------|-------------------------|-------------|
| ghr-miR160      | Gh_D11G0436 | 1           | 21        | 1663         | 1683       | UAUGAGGAGCCAUGCAUGUAAU  | CAACAUGUCUGGGUUCUCAUC   | Cleavage    |
| ghr-miR162a     | Gh_D05G1709 | 1           | 21        | 390          | 410        | UCGAUAAAACCUCUGCAUCCAG  | UGUAAUGCAGAGGUUAAUUGG   | Cleavage    |
| ghr-miR164      | Gh_D03G1095 | 1           | 21        | 117          | 137        | UGGAGAAGCAGGGCACGUGCA   | UUCACCUGCAUUGC UUCCCCA  | Cleavage    |
| ghr-miR164      | Gh_A03G0443 | 1           | 21        | 117          | 137        | UGGAGAAGCAGGGCACGUGCA   | UUCACCUGCAUUGC UUCCCCA  | Cleavage    |
| ghr-miR164      | Gh_A12G0439 | 1           | 21        | 1060         | 1080       | UGGAGAAGCAGGGCACGUGCA   | GCUACUGGUUCUGCUUCUUUG   | Cleavage    |
| ghr-miR164      | Gh_D12G0440 | 1           | 21        | 1060         | 1080       | UGGAGAAGCAGGGCACGUGCA   | GCUACUGGUUCUGCUUCUUUG   | Cleavage    |
| ghr-miR166b     | Gh_A07G1460 | 1           | 21        | 66           | 86         | UCGGACCAGGCUUCAU UCCCC  | UGAGAAAGAGAUUUGGUUCGA   | Cleavage    |
| ghr-miR167a     | Gh_A13G2318 | 1           | 21        | 1838         | 1857       | UGAAGCUGCCAGCAUGAUCUA   | UUGAACAUGCUGG-AGCUUCA   | Cleavage    |
| ghr-miR167a     | Gh_D08G0987 | 1           | 21        | 2060         | 2079       | UGAAGCUGCCAGCAUGAUCUA   | UUGAGCAUGCUGG-AGCUUCU   | Cleavage    |
| ghr-miR167a     | Gh_A08G0810 | 1           | 21        | 2060         | 2079       | UGAAGCUGCCAGCAUGAUCUA   | UUGAGCAUGCUGG-AGCUUCU   | Cleavage    |
| ghr-miR167a     | Gh_D13G2470 | 1           | 21        | 1838         | 1857       | UGAAGCUGCCAGCAUGAUCUA   | UUGAACUUGCUGG-AGCUUCA   | Cleavage    |
| ghr-miR167b     | Gh_A13G2318 | 1           | 21        | 1838         | 1857       | UGAAGCUGCCAGCAUGAUCUA   | UUGAACAUGCUGG-AGCUUCA   | Cleavage    |
| ghr-miR167b     | Gh_D08G0987 | 1           | 21        | 2060         | 2079       | UGAAGCUGCCAGCAUGAUCUA   | UUGAGCAUGCUGG-AGCUUCU   | Cleavage    |
| ghr-miR167b     | Gh_A08G0810 | 1           | 21        | 2060         | 2079       | UGAAGCUGCCAGCAUGAUCUA   | UUGAGCAUGCUGG-AGCUUCU   | Cleavage    |
| ghr-miR167b     | Gh_D13G2470 | 1           | 21        | 1838         | 1857       | UGAAGCUGCCAGCAUGAUCUA   | UUGAACUUGCUGG-AGCUUCA   | Cleavage    |
| ghr-miR169a     | Gh_D08G2074 | 1           | 21        | 2141         | 2161       | UAGCCAAGGAUGACUUGCCUG   | UGGUCACUUCAUCCUUGGAUA   | Cleavage    |
| ghr-miR169a     | Gh_A08G1723 | 1           | 21        | 2135         | 2155       | UAGCCAAGGAUGACUUGCCUG   | UGGUCACUUCAUCCUUGGAUA   | Cleavage    |
| ghr-miR169a     | Gh_D09G0055 | 1           | 21        | 614          | 634        | UAGCCAAGGAUGACUUGCCUG   | UGUUCAAGCCAUCCUUGUCUA   | Cleavage    |
| ghr-miR169a     | Gh_A09G0059 | 1           | 21        | 617          | 637        | UAGCCAAGGAUGACUUGCCUG   | UGUUCAAGCCAUCCUUGUCUA   | Cleavage    |
| ghr-miR172      | Gh_A12G0439 | 1           | 21        | 1288         | 1308       | AGAAUCCUGAUGAUGCUGCAG   | UUGCAGUAUAGUUAUGGUUCU   | Cleavage    |
| ghr-miR172      | Gh_D12G0440 | 1           | 21        | 1288         | 1308       | AGAAUCCUGAUGAUGCUGCAG   | UUGCAGUAUAGUUAUGGUUCU   | Cleavage    |
| ghr-miR172      | Gh_A13G2318 | 1           | 21        | 908          | 927        | AGAAUCCUGAUGAUGCUGCAG   | CAGCAGUAUCA-CAGGGU UCC  | Translation |
| ghr-miR2948-5p  | Gh_A01G0750 | 1           | 22        | 1078         | 1099       | UGUGGGAGAGUUGGGCAAGAAU  | GAGUUUGCUC AACUUUCCGCA  | Cleavage    |
| ghr-miR2948-5p  | Gh_D01G0769 | 1           | 22        | 1078         | 1099       | UGUGGGAGAGUUGGGCAAGAAU  | GAGUUUGCUC AACUUUCCGCA  | Cleavage    |
| ghr-miR2948-5p  | Gh_D13G1358 | 1           | 22        | 1186         | 1207       | UGUGGGAGAGUUGGGCAAGAAU  | GAGUUUGCUCAGCUUUUCCGCA  | Cleavage    |
| ghr-miR2948-5p  | Gh_A13G1093 | 1           | 22        | 1186         | 1207       | UGUGGGAGAGUUGGGCAAGAAU  | GAGUUUGCUCAGCUUUUCCGCA  | Cleavage    |
| ghr-miR2948-5p  | Gh_D03G1042 | 1           | 22        | 1256         | 1277       | UGUGGGAGAGUUGGGCAAGAAU  | GAGUUGGCCCAGCUCUCCCUCA  | Cleavage    |
| ghr-miR2948-5p  | Gh_D05G3139 | 1           | 22        | 753          | 774        | UGUGGGAGAGUUGGGCAAGAAU  | CUCCGUUCCUGAUUCUCCUAUG  | Cleavage    |
| ghr-miR2948-5p  | Gh_A03G0493 | 1           | 22        | 1256         | 1277       | UGUGGGAGAGUUGGGCAAGAAU  | GAGUUGGCCCAGCACUCCCUCA  | Cleavage    |
| ghr-miR2949a-5p | Gh_D07G1556 | 1           | 22        | 243          | 264        | ACUUUUUGAACUGGAUUUGCCGA | UGCCCGAAUUCAGUUGAAAAGA  | Cleavage    |
| ghr-miR2949a-5p | Gh_A07G1460 | 1           | 22        | 117          | 138        | ACUUUUUGAACUGGAUUUGCCGA | UGCCCGAAUUCAGUUGAAAAGA  | Cleavage    |
| ghr-miR2949a-5p | Gh_D09G1795 | 1           | 22        | 2007         | 2027       | ACUUUUUGAACUGGAUUUGCCGA | AUGGCCAA-CCAGUUUGAAAGG  | Cleavage    |
| ghr-miR2949b    | Gh_D07G1556 | 1           | 22        | 243          | 264        | UCUUUUUGAACUGGAUUUGCCGA | UGCCCGAAUUCAGUUGAAAAGA  | Cleavage    |
| ghr-miR2949b    | Gh_A07G1460 | 1           | 22        | 117          | 138        | UCUUUUUGAACUGGAUUUGCCGA | UGCCCGAAUUCAGUUGAAAAGA  | Cleavage    |
| ghr-miR2949b    | Gh_D09G1795 | 1           | 22        | 2007         | 2027       | UCUUUUUGAACUGGAUUUGCCGA | AUGGCCAA-CCAGUUUGAAAGG  | Cleavage    |
| ghr-miR2949b    | Gh_A05G3990 | 1           | 22        | 2152         | 2173       | UCUUUUUGAACUGGAUUUGCCGA | CAGGCAAAACAGGUUGAAAAGG  | Cleavage    |
| ghr-miR2949c    | Gh_D07G1556 | 1           | 22        | 243          | 264        | UCUUUUUGAACUGGAUUUGCCGA | UGCCCGAAUUCAGUUGAAAAGA  | Cleavage    |
| ghr-miR2949c    | Gh_A07G1460 | 1           | 22        | 117          | 138        | UCUUUUUGAACUGGAUUUGCCGA | UGCCCGAAUUCAGUUGAAAAGA  | Cleavage    |
| ghr-miR2949c    | Gh_D09G1795 | 1           | 22        | 2007         | 2027       | UCUUUUUGAACUGGAUUUGCCGA | AUGGCCAA-CCAGUUUGAAAGG  | Cleavage    |
| ghr-miR2949c    | Gh_A05G3990 | 1           | 22        | 2152         | 2173       | UCUUUUUGAACUGGAUUUGCCGA | CAGGCAAAACAGGUUGAAAAGG  | Cleavage    |
| ghr-miR2950     | Gh_D05G0100 | 1           | 21        | 3169         | 3189       | UGGUGUGCAGGGGGUGGAAUA   | CCUUCCACUCCUGACAUACCA   | Cleavage    |
| ghr-miR2950     | Gh_A05G0047 | 1           | 21        | 3169         | 3189       | UGGUGUGCAGGGGGUGGAAUA   | CCUUCCACUCCUGACAUACCA   | Cleavage    |
| ghr-miR2950     | Gh_A06G2074 | 1           | 21        | 400          | 420        | UGGUGUGCAGGGGGUGGAAUA   | CGUUCCACCUCUUCGCAGCU    | Cleavage    |

|              |             |   |    |      |      |                          |                          |             |
|--------------|-------------|---|----|------|------|--------------------------|--------------------------|-------------|
| ghr-miR2950  | Gh_D06G1329 | 1 | 21 | 361  | 381  | UGGUGUGCAGGGGGUGGAAUA    | CGUUCCACCUCCUUCGCAGCC    | Cleavage    |
| ghr-miR396a  | Gh_A05G0047 | 1 | 21 | 3082 | 3102 | UUCCACAGCUUUCUUGAACUG    | CAGUCCACAAAAGCUGAGGAA    | Cleavage    |
| ghr-miR396a  | Gh_D05G0100 | 1 | 21 | 3082 | 3102 | UUCCACAGCUUUCUUGAACUG    | CAGUCCACAAAAGCUGAGGAA    | Cleavage    |
| ghr-miR396a  | Gh_D10G1228 | 1 | 21 | 1069 | 1089 | UUCCACAGCUUUCUUGAACUG    | UACACCGAGGAAGCUGUGGAU    | Cleavage    |
| ghr-miR396a  | Gh_D07G1556 | 1 | 21 | 813  | 833  | UUCCACAGCUUUCUUGAACUG    | AGGUUCUAAAAAGCUGAGGAU    | Cleavage    |
| ghr-miR396a  | Gh_A07G1460 | 1 | 21 | 645  | 665  | UUCCACAGCUUUCUUGAACUG    | AGGUUCUAAAAAGCUGAGGAU    | Cleavage    |
| ghr-miR396a  | Gh_D08G2074 | 1 | 21 | 1281 | 1300 | UUCCACAGCUUUCUUGAACUG    | AAGUUCU-GAGAACUGUGGAA    | Cleavage    |
| ghr-miR396a  | Gh_A08G1723 | 1 | 21 | 1275 | 1294 | UUCCACAGCUUUCUUGAACUG    | AAGUUCU-GAGAACUGUGGAA    | Cleavage    |
| ghr-miR396b  | Gh_A05G0047 | 1 | 21 | 3082 | 3102 | UUCCACAGCUUUCUUGAACUG    | CAGUCCACAAAAGCUGAGGAA    | Cleavage    |
| ghr-miR396b  | Gh_D05G0100 | 1 | 21 | 3082 | 3102 | UUCCACAGCUUUCUUGAACUG    | CAGUCCACAAAAGCUGAGGAA    | Cleavage    |
| ghr-miR396b  | Gh_D10G1228 | 1 | 21 | 1069 | 1089 | UUCCACAGCUUUCUUGAACUG    | UACACCGAGGAAGCUGUGGAU    | Cleavage    |
| ghr-miR396b  | Gh_D07G1556 | 1 | 21 | 813  | 833  | UUCCACAGCUUUCUUGAACUG    | AGGUUCUAAAAAGCUGAGGAU    | Cleavage    |
| ghr-miR396b  | Gh_A07G1460 | 1 | 21 | 645  | 665  | UUCCACAGCUUUCUUGAACUG    | AGGUUCUAAAAAGCUGAGGAU    | Cleavage    |
| ghr-miR396b  | Gh_D08G2074 | 1 | 21 | 1281 | 1300 | UUCCACAGCUUUCUUGAACUG    | AAGUUCU-GAGAACUGUGGAA    | Cleavage    |
| ghr-miR396b  | Gh_A08G1723 | 1 | 21 | 1275 | 1294 | UUCCACAGCUUUCUUGAACUG    | AAGUUCU-GAGAACUGUGGAA    | Cleavage    |
| ghr-miR398   | Gh_D02G2296 | 1 | 21 | 2043 | 2063 | UGUGUUCUCAGGUCACCCCUU    | CAGGGGUGACUUGAGAGUAAA    | Cleavage    |
| ghr-miR398   | Gh_A03G1857 | 1 | 21 | 2046 | 2066 | UGUGUUCUCAGGUCACCCCUU    | CGGGGGUGACUUGAGAGUAAA    | Cleavage    |
| ghr-miR398   | Gh_D01G0769 | 1 | 21 | 513  | 533  | UGUGUUCUCAGGUCACCCCUU    | UAAGGGUGGCCCCAGAGCACA    | Translation |
| ghr-miR399a  | Gh_A10G1257 | 1 | 21 | 1027 | 1047 | CGCCAAUGGAGAUUUGUCCGG    | GCGCAUAGAUUGCCAUUGGCU    | Translation |
| ghr-miR399b  | Gh_A10G1257 | 1 | 21 | 1027 | 1047 | CGCCAAUGGAGAUUUGUCCGG    | GCGCAUAGAUUGCCAUUGGCU    | Translation |
| ghr-miR479   | Gh_A11G0376 | 1 | 22 | 2008 | 2030 | CGUGAUAUUGGU-UCGGCUCauc  | GAUGAGCCGAUGCCAauGUCACC  | Cleavage    |
| ghr-miR7484a | Gh_D08G0914 | 1 | 24 | 2968 | 2991 | UUUGUAUAUUAGAUCAAAGAGCAA | GUACAUUUUGAUUUGAAAUGUGAA | Cleavage    |
| ghr-miR7484a | Gh_A08G0768 | 1 | 24 | 2968 | 2991 | UUUGUAUAUUAGAUCAAAGAGCAA | GUACAUUUUGAUUUGAAAUGUGAA | Cleavage    |
| ghr-miR7484a | Gh_A05G3990 | 1 | 24 | 2860 | 2883 | UUUGUAUAUUAGAUCAAAGAGCAA | GUACAUUUUGAUUUGAAAUGUGAA | Cleavage    |
| ghr-miR7484a | Gh_D13G1358 | 1 | 24 | 795  | 818  | UUUGUAUAUUAGAUCAAAGAGCAA | GUCAGUUUUGAUCAAAUAUAAGGA | Translation |
| ghr-miR7484a | Gh_A13G1093 | 1 | 24 | 795  | 818  | UUUGUAUAUUAGAUCAAAGAGCAA | GUCAGUUUUGAUCAAAUAUAAGGA | Translation |
| ghr-miR7484a | Gh_A01G0794 | 1 | 24 | 3169 | 3192 | UUUGUAUAUUAGAUCAAAGAGCAA | GUGCAUUUUGAUCUGAAAUGUGAC | Cleavage    |
| ghr-miR7484a | Gh_A12G0439 | 1 | 24 | 3454 | 3477 | UUUGUAUAUUAGAUCAAAGAGCAA | GUGCAUUUUGAUUUAAAAUGUGAC | Cleavage    |
| ghr-miR7484a | Gh_D12G0440 | 1 | 24 | 3454 | 3477 | UUUGUAUAUUAGAUCAAAGAGCAA | GUGCAUUUUGAUUUAAAAUGUGAC | Cleavage    |
| ghr-miR7484a | Gh_D07G1556 | 1 | 24 | 3379 | 3402 | UUUGUAUAUUAGAUCAAAGAGCAA | GUCCAUUUUGAUCUGAAAUGUGAU | Cleavage    |
| ghr-miR7484a | Gh_D08G2074 | 1 | 24 | 3361 | 3384 | UUUGUAUAUUAGAUCAAAGAGCAA | GUCCAUUUUGAUCUGAAAUGUGAC | Cleavage    |
| ghr-miR7484a | Gh_A08G1723 | 1 | 24 | 3355 | 3378 | UUUGUAUAUUAGAUCAAAGAGCAA | GUCCAUUUUGAUCUGAAAUGUGAC | Cleavage    |
| ghr-miR7484a | Gh_A07G1460 | 1 | 24 | 3214 | 3237 | UUUGUAUAUUAGAUCAAAGAGCAA | GUCCAUUUUGAUCUGAAAUGUGAU | Cleavage    |
| ghr-miR7484a | Gh_D03G1084 | 1 | 24 | 1247 | 1270 | UUUGUAUAUUAGAUCAAAGAGCAA | AUACAuuUGGCUUUAAAAUACAAG | Cleavage    |
| ghr-miR7484a | Gh_A03G0454 | 1 | 24 | 1244 | 1267 | UUUGUAUAUUAGAUCAAAGAGCAA | AUACAuuUGGCUUUAAAAUACAAG | Cleavage    |
| ghr-miR7484b | Gh_D08G0914 | 1 | 24 | 2968 | 2991 | UUUGUAUAUUAGAUCAAAGAGCAA | GUACAUUUUGAUUUGAAAUGUGAA | Cleavage    |
| ghr-miR7484b | Gh_A08G0768 | 1 | 24 | 2968 | 2991 | UUUGUAUAUUAGAUCAAAGAGCAA | GUACAUUUUGAUUUGAAAUGUGAA | Cleavage    |
| ghr-miR7484b | Gh_A05G3990 | 1 | 24 | 2860 | 2883 | UUUGUAUAUUAGAUCAAAGAGCAA | GUACAUUUUGAUUUGAAAUGUGAA | Cleavage    |
| ghr-miR7484b | Gh_D13G1358 | 1 | 24 | 795  | 818  | UUUGUAUAUUAGAUCAAAGAGCAA | GUCAGUUUUGAUCAAAUAUAAGGA | Translation |
| ghr-miR7484b | Gh_A13G1093 | 1 | 24 | 795  | 818  | UUUGUAUAUUAGAUCAAAGAGCAA | GUCAGUUUUGAUCAAAUAUAAGGA | Translation |
| ghr-miR7484b | Gh_A01G0794 | 1 | 24 | 3169 | 3192 | UUUGUAUAUUAGAUCAAAGAGCAA | GUGCAUUUUGAUCUGAAAUGUGAC | Cleavage    |
| ghr-miR7484b | Gh_A12G0439 | 1 | 24 | 3454 | 3477 | UUUGUAUAUUAGAUCAAAGAGCAA | GUGCAUUUUGAUUUAAAAUGUGAC | Cleavage    |
| ghr-miR7484b | Gh_D12G0440 | 1 | 24 | 3454 | 3477 | UUUGUAUAUUAGAUCAAAGAGCAA | GUGCAUUUUGAUUUAAAAUGUGAC | Cleavage    |
| ghr-miR7484b | Gh_D07G1556 | 1 | 24 | 3379 | 3402 | UUUGUAUAUUAGAUCAAAGAGCAA | GUCCAUUUUGAUCUGAAAUGUGAU | Cleavage    |
| ghr-miR7484b | Gh_D08G2074 | 1 | 24 | 3361 | 3384 | UUUGUAUAUUAGAUCAAAGAGCAA | GUCCAUUUUGAUCUGAAAUGUGAC | Cleavage    |
| ghr-miR7484b | Gh_A08G1723 | 1 | 24 | 3355 | 3378 | UUUGUAUAUUAGAUCAAAGAGCAA | GUCCAUUUUGAUCUGAAAUGUGAC | Cleavage    |

|              |             |   |    |      |      |                           |                           |             |
|--------------|-------------|---|----|------|------|---------------------------|---------------------------|-------------|
| ghr-miR7484b | Gh_A07G1460 | 1 | 24 | 3214 | 3237 | UUUGUAUAUUAGAUCAAAGAGCAA  | GUCCAUUUUGAUCUGAAAUGUGAU  | Cleavage    |
| ghr-miR7484b | Gh_D03G1084 | 1 | 24 | 1247 | 1270 | UUUGUAUAUUAGAUCAAAGAGCAA  | AUACAUUUGGCUUUAAAAUACAAG  | Cleavage    |
| ghr-miR7484b | Gh_A03G0454 | 1 | 24 | 1244 | 1267 | UUUGUAUAUUAGAUCAAAGAGCAA  | AUACAUUUGGCUUUAAAAUACAAG  | Cleavage    |
| ghr-miR7485  | Gh_D08G2074 | 1 | 24 | 647  | 670  | AAAGACAUCUUUGAAUUCUUGGAG  | UUAUUUCCAUUCAGAAAUGUCUUU  | Cleavage    |
| ghr-miR7485  | Gh_A08G1723 | 1 | 24 | 641  | 664  | AAAGACAUCUUUGAAUUCUUGGAG  | UUAUUUCCAUUCAGAAAUGUCUUU  | Cleavage    |
| ghr-miR7487  | Gh_D09G1795 | 1 | 24 | 2427 | 2450 | AUACUCUUAUAGGACACUUGUUA   | AUGUCAAGAGCCCUUGGGGGUUAU  | Translation |
| ghr-miR7487  | Gh_D09G1795 | 1 | 24 | 2878 | 2900 | AUACUCUUAUAGGACACUUGUUA   | CUAGGUAGU-UCCUGUGAGAGUAC  | Cleavage    |
| ghr-miR7487  | Gh_A09G1689 | 1 | 24 | 2427 | 2450 | AUACUCUUAUAGGACACUUGUUA   | AUGUCAAGAGCCCUUGGGGGUUAU  | Translation |
| ghr-miR7488  | Gh_D02G2296 | 1 | 21 | 561  | 581  | UUUUGAGUACAGGGGACAAAA     | GAUCGUCUCGUGUACUCAAAA     | Cleavage    |
| ghr-miR7488  | Gh_D02G1209 | 1 | 21 | 113  | 133  | UUUUGAGUACAGGGGACAAAA     | UUUUCACCUCUGUUCUCAAGA     | Cleavage    |
| ghr-miR7488  | Gh_A05G1538 | 1 | 21 | 2029 | 2049 | UUUUGAGUACAGGGGACAAAA     | AUUAGCUCUUGUACCCAAAA      | Cleavage    |
| ghr-miR7488  | Gh_A03G1857 | 1 | 21 | 561  | 581  | UUUUGAGUACAGGGGACAAAA     | GAUCGUCUCGUGCACUCAAAA     | Cleavage    |
| ghr-miR7488  | Gh_D08G2074 | 1 | 21 | 2485 | 2505 | UUUUGAGUACAGGGGACAAAA     | GAUUCUUAUCUGUGCUAAAC      | Cleavage    |
| ghr-miR7488  | Gh_A08G1723 | 1 | 21 | 2479 | 2499 | UUUUGAGUACAGGGGACAAAA     | GAUUCUUAUCUGUGCUAAAC      | Cleavage    |
| ghr-miR7489  | Gh_A09G1689 | 1 | 24 | 1384 | 1406 | AUUGUUGCCAAUACAGGAGAACGU  | UUGGGCUCCA-UACUGGCAACAAU  | Translation |
| ghr-miR7489  | Gh_D08G1195 | 1 | 24 | 1383 | 1406 | AUUGUUGCCAAUACAGGAGAACGU  | AUUGGGUCCAUAUUGACAACAAU   | Cleavage    |
| ghr-miR7489  | Gh_D03G0813 | 1 | 24 | 1398 | 1421 | AUUGUUGCCAAUACAGGAGAACGU  | GUUGGGUCCAUAUUGUCAACAAU   | Cleavage    |
| ghr-miR7489  | Gh_A02G0949 | 1 | 24 | 1398 | 1421 | AUUGUUGCCAAUACAGGAGAACGU  | GUUGGGUCCAUAUUGUCAACAAU   | Cleavage    |
| ghr-miR7489  | Gh_D01G0769 | 1 | 24 | 937  | 960  | AUUGUUGCCAAUACAGGAGAACGU  | UCUCACUCGUCUCUUGGUGAUAAU  | Cleavage    |
| ghr-miR7489  | Gh_A01G0750 | 1 | 24 | 937  | 960  | AUUGUUGCCAAUACAGGAGAACGU  | UCUCACUCGUCUCUUGGUGAUAAU  | Cleavage    |
| ghr-miR7489  | Gh_D09G1795 | 1 | 24 | 1384 | 1406 | AUUGUUGCCAAUACAGGAGAACGU  | UUGGGCUCCA-UGCUGGCAACAAU  | Translation |
| ghr-miR7491  | Gh_A02G1702 | 1 | 24 | 622  | 646  | UGGGAUCUUCGAGAG-GAUUGAGCC | GCCAGAAUUGCUCUUGAAGAUCUUG | Cleavage    |
| ghr-miR7491  | Gh_D03G0017 | 1 | 24 | 607  | 631  | UGGGAUCUUCGAGAG-GAUUGAGCC | GCCAGAAUUGCUCUUGAAGAUCUUG | Cleavage    |
| ghr-miR7491  | Gh_A07G0531 | 1 | 24 | 72   | 95   | UGGGAUCUUCGAGAGGAUUGAGCC  | AGUUGAAUCAUCUCCACGGUCUCA  | Translation |
| ghr-miR7491  | Gh_D07G0600 | 1 | 24 | 72   | 95   | UGGGAUCUUCGAGAGGAUUGAGCC  | AGUUGAAUCAUCUCCACGGUCUCA  | Translation |
| ghr-miR7491  | Gh_D12G0368 | 1 | 24 | 2441 | 2465 | UGGGAUCUU-CGAGAGGAUUGAGCC | AGCCAAAGCUUCUUGCAAGAUCCCA | Cleavage    |
| ghr-miR7491  | Gh_A12G0297 | 1 | 24 | 2441 | 2465 | UGGGAUCUU-CGAGAGGAUUGAGCC | AGCCAAAGCUUCUUGCAAGAUCCCA | Cleavage    |
| ghr-miR7494  | Gh_D12G0440 | 1 | 23 | 1175 | 1197 | AGCUUGUGGACUAGUUUUAAACAA  | CUUAUGAAUCUAGUUCACAGCCA   | Cleavage    |
| ghr-miR7494  | Gh_A12G0439 | 1 | 23 | 1175 | 1197 | AGCUUGUGGACUAGUUUUAAACAA  | CUUAUGAAUCUAGUUCACAGCCA   | Cleavage    |
| ghr-miR7494  | Gh_A11G1536 | 1 | 23 | 446  | 468  | AGCUUGUGGACUAGUUUUAAACAA  | GAGGUGAAAGUGGUGAACAAGCU   | Cleavage    |
| ghr-miR7495a | Gh_A08G1723 | 1 | 21 | 2411 | 2431 | UUACUUUAGAUGUCUCCUUCA     | AGAAGGAUAUAUCUAAAAGAAG    | Cleavage    |
| ghr-miR7495a | Gh_A12G0439 | 1 | 21 | 2204 | 2224 | UUACUUUAGAUGUCUCCUUCA     | CUAAGGAGAAAUCUGAAUUGA     | Cleavage    |
| ghr-miR7495a | Gh_D12G0440 | 1 | 21 | 2204 | 2224 | UUACUUUAGAUGUCUCCUUCA     | CUAAGGAGAAAUCUGAAUUGA     | Cleavage    |
| ghr-miR7495a | Gh_A02G1702 | 1 | 21 | 404  | 424  | UUACUUUAGAUGUCUCCUUCA     | CUAGGGAGUUAUCUAAGGAAA     | Cleavage    |
| ghr-miR7495a | Gh_D03G0017 | 1 | 21 | 404  | 424  | UUACUUUAGAUGUCUCCUUCA     | CUAGGGAGUUAUCUAAGGAAA     | Cleavage    |
| ghr-miR7495a | Gh_D03G1095 | 1 | 21 | 77   | 97   | UUACUUUAGAUGUCUCCUUCA     | GAAAGGUGGAAUUUGAAGUAG     | Cleavage    |
| ghr-miR7495a | Gh_A03G0443 | 1 | 21 | 77   | 97   | UUACUUUAGAUGUCUCCUUCA     | GAAAGGUGGAAUUUGAAGUAG     | Cleavage    |
| ghr-miR7495a | Gh_D07G1556 | 1 | 21 | 2441 | 2461 | UUACUUUAGAUGUCUCCUUCA     | AAAAUGAUUAUCUAAAAGAAG     | Cleavage    |
| ghr-miR7495a | Gh_D02G1107 | 1 | 21 | 749  | 769  | UUACUUUAGAUGUCUCCUUCA     | CCGAGUGGACUUCUAAUGUAA     | Translation |
| ghr-miR7495a | Gh_A02G0925 | 1 | 21 | 749  | 769  | UUACUUUAGAUGUCUCCUUCA     | CCGAGUGGACUUCUAAUGUAA     | Translation |
| ghr-miR7495a | Gh_A07G0531 | 1 | 21 | 43   | 63   | UUACUUUAGAUGUCUCCUUCA     | ACAAGUGUACAUCUAAACUUAU    | Cleavage    |
| ghr-miR7495a | Gh_D07G0600 | 1 | 21 | 43   | 63   | UUACUUUAGAUGUCUCCUUCA     | ACAAGUGUACAUCUAAACUUAU    | Cleavage    |
| ghr-miR7495b | Gh_A08G1723 | 1 | 21 | 2411 | 2431 | UUACUUUAGAUGUCUCCUUCA     | AGAAGGAUAUAUCUAAAAGAAG    | Cleavage    |
| ghr-miR7495b | Gh_A12G0439 | 1 | 21 | 2204 | 2224 | UUACUUUAGAUGUCUCCUUCA     | CUAAGGAGAAAUCUGAAUUGA     | Cleavage    |
| ghr-miR7495b | Gh_D12G0440 | 1 | 21 | 2204 | 2224 | UUACUUUAGAUGUCUCCUUCA     | CUAAGGAGAAAUCUGAAUUGA     | Cleavage    |
| ghr-miR7495b | Gh_A02G1702 | 1 | 21 | 404  | 424  | UUACUUUAGAUGUCUCCUUCA     | CUAGGGAGUUAUCUAAGGAAA     | Cleavage    |

|              |             |   |    |      |      |                            |                            |             |
|--------------|-------------|---|----|------|------|----------------------------|----------------------------|-------------|
| ghr-miR7495b | Gh_D03G0017 | 1 | 21 | 404  | 424  | UUACUUUAGAUGUCUCCUUCA      | CUAGGGAGUUAUCUAAGGAAA      | Cleavage    |
| ghr-miR7495b | Gh_D03G1095 | 1 | 21 | 77   | 97   | UUACUUUAGAUGUCUCCUUCA      | GAAAGGUGGAAUUUGAAGUAG      | Cleavage    |
| ghr-miR7495b | Gh_A03G0443 | 1 | 21 | 77   | 97   | UUACUUUAGAUGUCUCCUUCA      | GAAAGGUGGAAUUUGAAGUAG      | Cleavage    |
| ghr-miR7495b | Gh_D07G1556 | 1 | 21 | 2441 | 2461 | UUACUUUAGAUGUCUCCUUCA      | AAAAUGAUUAUCUAAAAGAAG      | Cleavage    |
| ghr-miR7495b | Gh_D02G1107 | 1 | 21 | 749  | 769  | UUACUUUAGAUGUCUCCUUCA      | CCGAGUGGACUUCUAAUGUAA      | Translation |
| ghr-miR7495b | Gh_A02G0925 | 1 | 21 | 749  | 769  | UUACUUUAGAUGUCUCCUUCA      | CCGAGUGGACUUCUAAUGUAA      | Translation |
| ghr-miR7495b | Gh_A07G0531 | 1 | 21 | 43   | 63   | UUACUUUAGAUGUCUCCUUCA      | ACAAGUGUACAUCUAAACUUAU     | Cleavage    |
| ghr-miR7495b | Gh_D07G0600 | 1 | 21 | 43   | 63   | UUACUUUAGAUGUCUCCUUCA      | ACAAGUGUACAUCUAAACUUAU     | Cleavage    |
| ghr-miR7496a | Gh_D11G0436 | 1 | 24 | 753  | 776  | AUGACCAAAUUGAUAGAAUGUGUA   | UUCUGAUUCUAUUGAUUUGAAUGU   | Cleavage    |
| ghr-miR7496a | Gh_A11G0376 | 1 | 24 | 744  | 767  | AUGACCAAAUUGAUAGAAUGUGUA   | UCCUGAUUCUAUUGAUUUGAAUGU   | Cleavage    |
| ghr-miR7496a | Gh_A05G0460 | 1 | 24 | 837  | 860  | AUGACCAAAUUGAUAGAAUGUGUA   | GAAUUGUACUGUUAUUUGGUGAG    | Cleavage    |
| ghr-miR7496a | Gh_D05G3923 | 1 | 24 | 816  | 839  | AUGACCAAAUUGAUAGAAUGUGUA   | GAAUUGUACUGUUAUUUGGUGAG    | Cleavage    |
| ghr-miR7496b | Gh_D11G0436 | 1 | 24 | 753  | 776  | AUGACCAAAUUGAUAGAAUGUGUA   | UUCUGAUUCUAUUGAUUUGAAUGU   | Cleavage    |
| ghr-miR7496b | Gh_A11G0376 | 1 | 24 | 744  | 767  | AUGACCAAAUUGAUAGAAUGUGUA   | UCCUGAUUCUAUUGAUUUGAAUGU   | Cleavage    |
| ghr-miR7496b | Gh_A05G0460 | 1 | 24 | 837  | 860  | AUGACCAAAUUGAUAGAAUGUGUA   | GAAUUGUACUGUUAUUUGGUGAG    | Cleavage    |
| ghr-miR7496b | Gh_D05G3923 | 1 | 24 | 816  | 839  | AUGACCAAAUUGAUAGAAUGUGUA   | GAAUUGUACUGUUAUUUGGUGAG    | Cleavage    |
| ghr-miR7497  | Gh_A06G1787 | 1 | 23 | 96   | 117  | ACAUGUGGACUGUCAUAUGGGUU    | UAUACGUGU-ACGGUUCAUGUGU    | Cleavage    |
| ghr-miR7497  | Gh_D06G2192 | 1 | 23 | 96   | 117  | ACAUGUGGACUGUCAUAUGGGUU    | UAUACGUGU-ACGGUUCAUGUGU    | Cleavage    |
| ghr-miR7498  | Gh_A03G1178 | 1 | 24 | 488  | 510  | AUGGUGACACAUGGUAGUCUCACA   | ACUAUGGUUACCAUGU-UCACCAU   | Cleavage    |
| ghr-miR7498  | Gh_D02G1615 | 1 | 24 | 488  | 510  | AUGGUGACACAUGGUAGUCUCACA   | ACUAUGGUUCCCAUG-GUCACCAU   | Cleavage    |
| ghr-miR7499  | Gh_D05G3923 | 1 | 24 | 801  | 824  | AUAUAUUUUUCGGUUAUUUCGGUU   | GGCUCAAUUACCGUGAAUUGUAC    | Translation |
| ghr-miR7500  | Gh_D08G2074 | 1 | 24 | 1899 | 1922 | AUCGAGUUAUUCGAGUUAUUCGAG   | UAAAAUUGAUUUGAGUAAAUCCA    | Cleavage    |
| ghr-miR7500  | Gh_A08G1723 | 1 | 24 | 1893 | 1916 | AUCGAGUUAUUCGAGUUAUUCGAG   | UAAAAUUGAUUUGAGUAAAUCCA    | Cleavage    |
| ghr-miR7501  | Gh_A07G0531 | 1 | 24 | 1159 | 1182 | AUAUCUGAUUCUGACACGAAAAAA   | CAACUC AUGUUACAUCAGAGAU    | Translation |
| ghr-miR7502  | Gh_D08G0914 | 1 | 24 | 2334 | 2357 | UUUUUAACAGUAGAAAUGAAUGAA   | ACAGUUUGUUGCUUCAGUUA AAAA  | Translation |
| ghr-miR7502  | Gh_A08G0768 | 1 | 24 | 2334 | 2357 | UUUUUAACAGUAGAAAUGAAUGAA   | ACAGUUUGUUGCUUCAGUUA AAAA  | Translation |
| ghr-miR7502  | Gh_D07G0509 | 1 | 24 | 546  | 569  | UUUUUAACAGUAGAAAUGAAUGAA   | AGCUAUUGCUGCUGCUGUUGAAGG   | Cleavage    |
| ghr-miR7502  | Gh_A07G0445 | 1 | 24 | 546  | 569  | UUUUUAACAGUAGAAAUGAAUGAA   | AGCUAUUGCUGCUGCUGUUGAAGG   | Cleavage    |
| ghr-miR7502  | Gh_D03G1084 | 1 | 24 | 588  | 611  | UUUUUAACAGUAGAAAUGAAUGAA   | AGCUAUUGCUGCUGCUGUUGAAGG   | Cleavage    |
| ghr-miR7502  | Gh_A03G0454 | 1 | 24 | 588  | 611  | UUUUUAACAGUAGAAAUGAAUGAA   | AGCUAUUGCUGCUGCUGUUGAAGG   | Cleavage    |
| ghr-miR7504a | Gh_A12G0439 | 1 | 24 | 502  | 525  | UAUGAAACUGUGAUUCCACGUCAU   | AGUCAGGGGCAUCAAGGUUUUGUA   | Translation |
| ghr-miR7504a | Gh_D12G0440 | 1 | 24 | 502  | 525  | UAUGAAACUGUGAUUCCACGUCAU   | AGUCAGGGGCAUCAAGGUUUUGUA   | Translation |
| ghr-miR7504b | Gh_A11G1536 | 1 | 24 | 330  | 353  | AGGAGGAAAAUCUGAUUUUGUCAU   | UUCACGAAUCAGACUUUCCUUUU    | Translation |
| ghr-miR7504b | Gh_D11G1701 | 1 | 24 | 330  | 353  | AGGAGGAAAAUCUGAUUUUGUCAU   | UUCACGAAUCAGACUGUCCUUUU    | Translation |
| ghr-miR7504b | Gh_D02G0126 | 1 | 24 | 118  | 142  | AGGAGG-AAAAAUCUGAUUUUGUCAU | GCUACAGAU CAGAUGUUUGCCUCCU | Translation |
| ghr-miR7504b | Gh_A10G1257 | 1 | 24 | 187  | 210  | AGGAGGAAAAUCUGAUUUUGUCAU   | GCUACAGAU CAGAUGUUUGCUUCC  | Translation |
| ghr-miR7504b | Gh_D10G1228 | 1 | 24 | 187  | 210  | AGGAGGAAAAUCUGAUUUUGUCAU   | GCUACAGAU CAGAUGUUUGCUUCC  | Translation |
| ghr-miR7504b | Gh_D08G2074 | 1 | 24 | 1802 | 1824 | AGGAGGAAAAUCUGAUUUUGUCAU   | CCGAUAUAUU-GAUUUUUUCUCCA   | Cleavage    |
| ghr-miR7505  | Gh_A08G0810 | 1 | 21 | 1883 | 1904 | UUCAG-AAACCAUCCCUUCCUU     | UGGGAUUGGAUGGUUUACUGAA     | Cleavage    |
| ghr-miR7505  | Gh_D08G0987 | 1 | 21 | 1883 | 1904 | UUCAG-AAACCAUCCCUUCCUU     | UGGGAUUGGAUGGUUUACUGAA     | Cleavage    |
| ghr-miR7506  | Gh_A05G3990 | 1 | 24 | 1266 | 1289 | AUGUCUGGGACAUGGCGUUGGCAC   | GAAUGAACACAAUGUUCUAGAUGG   | Cleavage    |
| ghr-miR7507  | Gh_A01G0844 | 1 | 24 | 1340 | 1363 | AAGGUAGUGAAGUAGGCAAUUGGG   | GGAAGAUGCUUAAUUCACUAUCUA   | Cleavage    |
| ghr-miR7507  | Gh_D01G0872 | 1 | 24 | 1340 | 1363 | AAGGUAGUGAAGUAGGCAAUUGGG   | GGAAGAUGCUUAAUUCACUAUCUA   | Cleavage    |
| ghr-miR7509  | Gh_A05G3990 | 1 | 24 | 2967 | 2990 | UCAAAAAGCACUUUUUGACAGCAAU  | AUUAGUUUCAGGAGGUGUUUGUGG   | Cleavage    |
| ghr-miR7509  | Gh_D05G0049 | 1 | 24 | 2373 | 2396 | UCAAAAAGCACUUUUUGACAGCAAU  | AUUAGUUUCAGGAGGUGUUUGUGG   | Cleavage    |
| ghr-miR7509  | Gh_A11G0376 | 1 | 24 | 1986 | 2009 | UCAAAAAGCACUUUUUGACAGCAAU  | UGAUAUCUCAGAAGCAGCUUUUGA   | Translation |

|              |             |   |    |      |      |                          |                           |             |
|--------------|-------------|---|----|------|------|--------------------------|---------------------------|-------------|
| ghr-miR7510a | Gh_D10G1228 | 1 | 24 | 1758 | 1781 | AAGGUCAUGAUCUUUAGCGGCGUU | UACAGCGGAAAAGAAUGUGACCUU  | Translation |
| ghr-miR7510a | Gh_D13G1358 | 1 | 24 | 694  | 717  | AAGGUCAUGAUCUUUAGCGGCGUU | AAACUUGUUUACGAUCAUGACAUU  | Cleavage    |
| ghr-miR7510a | Gh_A13G1093 | 1 | 24 | 694  | 717  | AAGGUCAUGAUCUUUAGCGGCGUU | AAACUUGUUUACGAUCAUGACAUU  | Cleavage    |
| ghr-miR7510b | Gh_A09G1689 | 1 | 23 | 1310 | 1332 | AAGAACAUGAUCUUUAGCGGCGU  | CCGGAGAUGAUGAUUAUGUUCUU   | Cleavage    |
| ghr-miR7510b | Gh_D09G1795 | 1 | 23 | 1310 | 1332 | AAGAACAUGAUCUUUAGCGGCGU  | CCGGAGAUGAUGAUUAUGUUCUU   | Cleavage    |
| ghr-miR7510b | Gh_D03G0813 | 1 | 23 | 1325 | 1347 | AAGAACAUGAUCUUUAGCGGCGU  | CUGGAGAUGAUGAUUAUGUUCUU   | Cleavage    |
| ghr-miR7510b | Gh_A02G0949 | 1 | 23 | 1325 | 1347 | AAGAACAUGAUCUUUAGCGGCGU  | CUGGAGAUGAUGAUUAUGUUCUU   | Cleavage    |
| ghr-miR7511  | Gh_D07G1556 | 1 | 24 | 1817 | 1840 | AGAAGUUUUGCAUGUGUAGCUGAG | CAAAACUGGAUAUGCAGAACUGCU  | Cleavage    |
| ghr-miR7511  | Gh_A07G1460 | 1 | 24 | 1649 | 1672 | AGAAGUUUUGCAUGUGUAGCUGAG | CAAAACUGGAUAUGCAGAACUGCU  | Cleavage    |
| ghr-miR7511  | Gh_D07G1556 | 1 | 24 | 1354 | 1377 | AGAAGUUUUGCAUGUGUAGCUGAG | GCCAACCACACAUGCCAAGCUUUAU | Cleavage    |
| ghr-miR7511  | Gh_A07G1460 | 1 | 24 | 1186 | 1209 | AGAAGUUUUGCAUGUGUAGCUGAG | GCCAACCACACAUGCCAAGCUUUAU | Cleavage    |
| ghr-miR7511  | Gh_D08G2074 | 1 | 24 | 3107 | 3130 | AGAAGUUUUGCAUGUGUAGCUGAG | AAGAUCGACUGAUGAAAGACUUCU  | Translation |
| ghr-miR7511  | Gh_A08G1723 | 1 | 24 | 3101 | 3124 | AGAAGUUUUGCAUGUGUAGCUGAG | AAGAUCGACUGAUGAAAGACUUCU  | Translation |
| ghr-miR7512  | Gh_A10G1257 | 1 | 21 | 2192 | 2212 | UGCUCUUGUAGUUAUGCAUG     | ACAGCAUGGCUGCAAGGAGUG     | Cleavage    |
| ghr-miR7512  | Gh_D01G0769 | 1 | 21 | 1336 | 1356 | UGCUCUUGUAGUUAUGCAUG     | UCAGCACAACUUCAAGUGGCU     | Translation |
