# Supplementary material for: Map-Based Functional Analysis of the GhNLP Genes Reveals Their Roles in Enhancing Tolerance to N-Deficiency in Cotton
Source: MDPI journal article supplement (doi:10.3390/ijms20194953), 2019-10-08
Supplement: s1 [file s1]

Table S6: *NLP* gene specific primers for RT-qPCR analysis

| S/No. | Seq ID      | Orientation | Len | tm    | GC%   | Any compl | 3' compl | Seq                   |
|-------|-------------|-------------|-----|-------|-------|-----------|----------|-----------------------|
| 1     | Gh_A01G0794 | F           | 20  | 59.98 | 50    | 4         | 2        | AGCGCAGGGAGACATTCTTA  |
|       |             | R           | 20  | 60.18 | 45    | 6         | 2        | CCACCACATTTGGATGATGA  |
| 2     | Gh_A03G0454 | F           | 20  | 59.98 | 60    | 4         | 2        | AAGGGGACTAGCTGGAGAGC  |
|       |             | R           | 20  | 60.1  | 45    | 3         | 0        | TGTGCTATTACCCGCATCAA  |
| 3     | Gh_A03G0493 | F           | 20  | 60.05 | 55    | 3         | 2        | CAGTGGAGTGCCTGTAGCAA  |
|       |             | R           | 20  | 59.87 | 50    | 4         | 0        | AGAACCCAAACACGTTGTCC  |
| 4     | Gh_A03G1178 | F           | 20  | 60.09 | 45    | 5         | 2        | TAGTTACGGCGGAAAAATCG  |
|       |             | R           | 19  | 59.66 | 52.63 | 3         | 2        | CCAGTGATTCCCGCTGTTA   |
| 5     | Gh_A03G1567 | F           | 20  | 59.94 | 45    | 4         | 3        | TGGAGTTGTGATTCCACCAA  |
|       |             | R           | 20  | 59.95 | 50    | 4         | 0        | CTGTGTCATGCCGGATATTG  |
| 6     | Gh_A05G0079 | F           | 20  | 60.07 | 50    | 7         | 2        | CCATCGAAACCTTCGACCTA  |
|       |             | R           | 20  | 60.45 | 45    | 4         | 0        | GGCATTTCAAGGAACGAATG  |
| 7     | Gh_A06G0421 | F           | 20  | 60.11 | 45    | 4         | 0        | CAAGCATTGACGGGTTTCTT  |
|       |             | R           | 20  | 59.85 | 50    | 5         | 2        | AACCACAGGTTGCCATAAG   |
| 8     | Gh_A06G1787 | F           | 20  | 59.92 | 45    | 3         | 2        | CCGAAGTGCCCGATTATTTA  |
|       |             | R           | 20  | 59.68 | 55    | 4         | 2        | TACTGTCCCGACCGAGAGAT  |
| 9     | Gh_A06G2074 | F           | 20  | 59.83 | 50    | 5         | 0        | TTTCAGTGACGACCGATGAG  |
|       |             | R           | 20  | 59.82 | 50    | 4         | 1        | GACATACTGTGGCCGATTT   |
| 10    | Gh_A11G0376 | F           | 20  | 59.88 | 40    | 4         | 2        | TCCAAAATGGGAAATGAAGC  |
|       |             | R           | 20  | 60.06 | 45    | 7         | 0        | AGGATATGCCGCAAATGAAG  |
| 11    | Gh_A12G0439 | F           | 20  | 59.96 | 50    | 4         | 2        | GAAGCCGTCTGATTTTGAGC  |
|       |             | R           | 20  | 59.93 | 50    | 4         | 0        | GGCAATGATCCACAAGAGGT  |
| 12    | Gh_A12G1336 | F           | 21  | 59.72 | 52.38 | 2         | 0        | GCTCCACCCTAACCATAAACC |
|       |             | R           | 20  | 59.23 | 35    | 4         | 1        | TGATCTTCGCCAATTCAAAA  |
| 13    | Gh_D02G1615 | F           | 20  | 60.09 | 45    | 5         | 2        | TAGTTACGGCGGAAAAATCG  |
|       |             | R           | 20  | 59.53 | 50    | 6         | 0        | GATTCCCGCTGTGAATAAGG  |
| 14    | Gh_D02G2018 | F           | 20  | 59.94 | 45    | 4         | 3        | TGGAGTTGTGATTCCACCAA  |
|       |             | R           | 20  | 59.95 | 50    | 4         | 0        | CTGTGTCATGCCGGATATTG  |
| 15    | Gh_D03G1042 | F           | 20  | 60.05 | 55    | 3         | 2        | CAGTGGAGTGCCTGTAGCAA  |
|       |             | R           | 20  | 59.87 | 50    | 4         | 0        | AGAACCCAAACACGTTGTCC  |
| 16    | Gh_D03G1084 | F           | 20  | 59.98 | 60    | 4         | 2        | AAGGGGACTAGCTGGAGAGC  |
|       |             | R           | 20  | 60.1  | 45    | 3         | 0        | TGTGCTATTACCCGCATCAA  |
| 17    | Gh_D04G1546 | F           | 20  | 59.9  | 45    | 3         | 0        | TTGGACTTGAAAAGGGGATG  |
|       |             | R           | 20  | 60.07 | 45    | 6         | 1        | TTGATATCGGCTGGTGTTGA  |
| 18    | Gh_D05G1588 | F           | 20  | 59.84 | 55    | 4         | 0        | CCTCACCAAGCTCTCCAAAC  |
|       |             | R           | 20  | 60.07 | 50    | 4         | 0        | GAATTTGCTGTACGGGAGGA  |
| 19    | Gh_D05G3139 | F           | 20  | 60.16 | 45    | 4         | 1        | TGTTGTTGATCGCCACACTT  |
|       |             | R           | 20  | 59.99 | 50    | 3         | 2        | TCATCCTGTGCTTCACTGC   |
| 20    | Gh_D06G1329 | F           | 20  | 59.99 | 45    | 6         | 2        | TCTTGACGCGTTGATTTCAG  |
|       |             | R           | 20  | 59.82 | 50    | 4         | 1        | GACATACTGTGGCCGATTT   |
| 21    | Gh_D09G0055 | F           | 20  | 59.93 | 50    | 2         | 0        | GTTATCCAAAGCCCTCACCA  |
|       |             | R           | 20  | 59.68 | 50    | 5         | 0        | GGTTGGGTGTCATCACCTTT  |
| 22    | Gh_D11G0397 | F           | 20  | 60.01 | 50    | 4         | 2        | AGACACCCGTTTCCAAAGTG  |
|       |             | R           | 20  | 59.84 | 50    | 4         | 1        | TTCCAGAAGTGCTCCCAACT  |
| 23    | Gh_D11G0626 | F           | 20  | 59.84 | 60    | 8         | 3        | GCCCTGAGAAGTCTCACAC   |
|       |             | R           | 20  | 60.17 | 40    | 4         | 2        | TGAATTTGTTCCTCCGTCAT  |
| 24    | Gh_D12G0440 | F           | 20  | 59.96 | 50    | 4         | 2        | GAAGCCGTCTGATTTTGAGC  |
|       |             | R           | 20  | 59.93 | 50    | 4         | 0        | GGCAATGATCCACAAGAGGT  |
| 25    | Gh_A01G0750 | F           | 20  | 59.8  | 60    | 4         | 3        | GGCTGATGAGAGTGGGTCTC  |
|       |             | R           | 20  | 60.1  | 50    | 2         | 0        | ATTTGCTCTCTGCTCCTCCA  |
| 26    | Gh_A01G1468 | F           | 20  | 59.99 | 40    | 3         | 3        | TCAAAACGCTGAAAGCAATG  |
|       |             | R           | 20  | 60.04 | 45    | 4         | 2        | TTATGGCTTTGGGATCTTGC  |
| 27    | Gh_A02G0102 | F           | 20  | 59.86 | 50    | 8         | 1        | TGTCATGCGCATAGCTTACC  |
|       |             | R           | 20  | 60.04 | 50    | 3         | 1        | CTTTTTCAGGAGGACCATCA  |
| 28    | Gh_A02G0925 | F           | 20  | 60.11 | 50    | 4         | 1        | AAGTTTGATCCAGCCACAGG  |
|       |             | R           | 20  | 60.02 | 50    | 5         | 3        | TGAACTTGAAAGCGACAGTG  |
| 29    | Gh_A02G0949 | F           | 20  | 59.83 | 50    | 2         | 0        | TGTCCAAGGTGCTGATGAAG  |
|       |             | R           | 20  | 60    | 55    | 4         | 0        | CATGGGGTGTGTCTGAGTG   |
| 30    | Gh_A05G3286 | F           | 20  | 59.92 | 50    | 3         | 1        | TTCTCTCTTCCCCTTGACGA  |
|       |             | R           | 20  | 60.36 | 45    | 7         | 2        | AAGCAGCAATGATGCCTTTC  |
| 31    | Gh_A05G3990 | F           | 20  | 59.97 | 50    | 3         | 2        | GATGACCAGGCAAAACAGGT  |
|       |             | R           | 20  | 60.07 | 40    | 5         | 2        | TGCAAGTATGCCATTCCAAA  |
| 32    | Gh_A08G0768 | F           | 20  | 59.96 | 45    | 5         | 2        | TTAATGCCACTGGTGTCCA   |
|       |             | R           | 20  | 60.05 | 45    | 4         | 0        | TTTGGACGGGGATATGTTGT  |
| 33    | Gh_A08G0810 | F           | 20  | 59.72 | 40    | 5         | 1        | AAAAGTTGCGGAAACCAGAA  |
|       |             | R           | 20  | 60.03 | 55    | 3         | 2        | CTGCTCTGCTGCTTCATCTG  |
| 34    | Gh_A09G1689 | F           | 20  | 59.96 | 55    | 5         | 2        | GCAGGGAGTCTCAAAGATGC  |
|       |             | R           | 20  | 60.13 | 55    | 4         | 1        | AACTTCCGGCACCCCTCTACT |
| 35    | Gh_A10G1257 | F           | 20  | 59.91 | 55    | 3         | 0        | GGGTTCTTCCCTGGTCTTC   |
|       |             | R           | 20  | 60.14 | 50    | 4         | 3        | AACCGCAGCATTACAGTTAC  |
| 36    | Gh_A13G2318 | F           | 20  | 60.11 | 45    | 6         | 2        | AGTTCGCCCAATTGTTCAAG  |
|       |             | R           | 20  | 59.83 | 45    | 6         | 2        | CATGATCGAGCGTTTCGTAAA |
| 37    | Gh_D01G0769 | F           | 20  | 59.96 | 50    | 4         | 2        | GTGAGCAAGCGATTTCCTTC  |
|       |             | R           | 20  | 60.03 | 50    | 7         | 1        | GCCACTTGAAGTTGTGCTGA  |
| 38    | Gh_D01G1705 | F           | 20  | 60.12 | 50    | 7         | 0        | TTATGCAGCCTGCTCCTTCT  |
|       |             | R           | 20  | 60.18 | 50    | 6         | 2        | TTGCAGACGTGCTCAAGTTC  |
| 39    | Gh_D02G0126 | F           | 20  | 60.15 | 50    | 5         | 2        | AACCTTCCCGTCGGAATATC  |

|    |             |   |    |       |    |   |   |                      |
|----|-------------|---|----|-------|----|---|---|----------------------|
|    |             | R | 20 | 59.83 | 45 | 4 | 0 | CAGTTGGAATGTCCCGTTTT |
| 40 | Gh_D02G1107 | F | 20 | 59.88 | 45 | 6 | 3 | GCATTTGTTGCAGCAGGTAA |
|    |             | R | 20 | 60.02 | 50 | 5 | 3 | TGAACTTGAAGCGGACAGTG |
| 41 | Gh_D03G0017 | F | 20 | 59.95 | 55 | 6 | 2 | TCTATTGCAGGGGGTACCAG |
|    |             | R | 20 | 59.84 | 45 | 3 | 0 | ACATCATTCGCCTCTTTGCT |
| 42 | Gh_D03G0813 | F | 20 | 59.83 | 50 | 2 | 0 | TGTCCAAGGTGCTGATGAAG |
|    |             | R | 20 | 60    | 55 | 4 | 0 | CATGGGGTGTGTCTGAGTG  |
| 43 | Gh_D05G0100 | F | 20 | 59.99 | 55 | 4 | 2 | CTGGGCATGGTTGTAGTCCT |
|    |             | R | 20 | 59.96 | 55 | 4 | 0 | GACTTGCCATGCTCTCCTTC |
| 44 | Gh_D05G1709 | F | 20 | 59.99 | 50 | 5 | 3 | GCACTGCCATGAAACTCAGA |
|    |             | R | 20 | 60.26 | 55 | 4 | 1 | CAGCTCACCATTCCCAGAGT |
| 45 | Gh_D08G0987 | F | 20 | 59.69 | 45 | 5 | 3 | CATGCCAGAAAAGTTGTGGA |
|    |             | R | 20 | 60.03 | 55 | 3 | 3 | CTCTGCTGCTTCATCTGCTG |
| 46 | Gh_D08G1195 | F | 20 | 60.01 | 50 | 5 | 3 | GCCTTGGTGTTTGTCCAAC  |
|    |             | R | 20 | 60.01 | 55 | 3 | 2 | ACTTCCAGCAGCCTCCACTA |
| 47 | Gh_D08G1828 | F | 20 | 60.46 | 45 | 4 | 2 | TGGCAGATCCAAGTTCCAAT |
|    |             | R | 20 | 60.07 | 50 | 4 | 2 | CTGTTCCCTGCTTGATCCAT |
| 48 | Gh_D09G1795 | F | 20 | 59.96 | 55 | 5 | 2 | GCAGGGAGTCTCAAAGATGC |
|    |             | R | 20 | 60.13 | 55 | 4 | 1 | AACTTCCGGCACCTCTACT  |
| 49 | Gh_D10G1228 | F | 20 | 59.96 | 50 | 4 | 2 | CCGTTGGCTCTAACATGGAT |
|    |             | R | 20 | 60.12 | 50 | 7 | 1 | GCTTTCGTGGTCCACTCATT |
| 50 | Gh_D12G0368 | F | 20 | 59.73 | 45 | 6 | 0 | TTGCGGACGTCACATTTTAG |
|    |             | R | 20 | 59.98 | 45 | 5 | 0 | ACTTTTGGCAAGGGAGGTT  |
| 51 | Gh_D13G1358 | F | 20 | 59.99 | 50 | 4 | 1 | AGCCTTCGAGTGGTTCTTCA |
|    |             | R | 20 | 59.83 | 50 | 5 | 2 | CTGAACAGTGCTCCATTCCA |
| 52 | Gh_D13G1958 | F | 20 | 60.23 | 45 | 4 | 1 | CGAAATTGCTGCGGATAAGT |
|    |             | R | 20 | 59.86 | 50 | 4 | 1 | ATGCAGTCACATTGGAGCAG |
| 53 | Gh_D13G2470 | F | 20 | 60.1  | 55 | 2 | 2 | CGGGTGAAGAAGAGGGTGTA |
|    |             | R | 20 | 59.99 | 50 | 4 | 0 | CTCTGCCACTTTTGGCTTC  |
