# Supplementary material for: Map-Based Functional Analysis of the GhNLP Genes Reveals Their Roles in Enhancing Tolerance to N-Deficiency in Cotton
Source: MDPI journal article supplement (doi:10.3390/ijms20194953), 2019-10-08
Supplement: s1 [file s1]

Table S2: Duplication analysis of the cotton *NIN* genes

| Sequence names   |                  | Sd       | Sn       | S        | N        | ps     | pn     | ds     | dn     | ds/dn  | ps/pn  | Positive/<br>purifying<br>selection |
|------------------|------------------|----------|----------|----------|----------|--------|--------|--------|--------|--------|--------|-------------------------------------|
| Gorai.005G035500 | Gorai.005G126000 | 440.6667 | 1736.333 | 659.1667 | 2322.833 | 0.6685 | 0.7475 | 1.6648 | 4.2798 | 0.389  | 0.8943 | yes                                 |
| Gorai.002G218300 | Gorai.003G002500 | 147.8333 | 564.1667 | 212.6667 | 753.3333 | 0.6951 | 0.7489 | 1.9615 | 4.8894 | 0.4012 | 0.9282 | yes                                 |
| Gh_A11G0542      | Gh_A11G1536      | 240.5    | 820.5    | 336.3333 | 1094.667 | 0.7151 | 0.7495 | 2.2999 | 5.5528 | 0.4142 | 0.954  | yes                                 |
| Gorai.008G049200 | Gorai.008G193400 | 133      | 536      | 187.6667 | 715.3333 | 0.7087 | 0.7493 | 2.1745 | 5.2337 | 0.4155 | 0.9458 | yes                                 |
| Gorai.009G174700 | Gorai.009G226800 | 212.1667 | 721.8333 | 294      | 963      | 0.7217 | 0.7496 | 2.4567 | 5.5934 | 0.4392 | 0.9628 | yes                                 |
| Gorai.009G006600 | Gorai.009G012400 | 487.5    | 1931.5   | 729.5    | 2594.5   | 0.6683 | 0.7445 | 1.6625 | 3.681  | 0.4516 | 0.8977 | yes                                 |
| Gorai.009G187500 | Gorai.010G056300 | 426      | 1642     | 623.3333 | 2199.667 | 0.6834 | 0.7465 | 1.8163 | 4.0205 | 0.4518 | 0.9155 | yes                                 |
| Ga13G2501        | Gh_A01G1560      | 150.3333 | 609.6667 | 216.1667 | 815.8333 | 0.6955 | 0.7473 | 1.9657 | 4.2182 | 0.466  | 0.9306 | yes                                 |
| Gh_A11G3016      | Gh_A12G0439      | 249.8333 | 927.1667 | 368      | 1246     | 0.6789 | 0.7441 | 1.7669 | 3.6357 | 0.486  | 0.9124 | yes                                 |
| Gh_D03G1042      | Gh_D03G1084      | 278      | 949      | 389.3333 | 1269.667 | 0.714  | 0.7474 | 2.2783 | 4.2601 | 0.5348 | 0.9553 | yes                                 |
| Gh_A03G1178      | Gh_A05G0460      | 83       | 321      | 125.1667 | 435.8333 | 0.6631 | 0.7365 | 1.6166 | 3.0142 | 0.5363 | 0.9003 | yes                                 |
| Gorai.005G126000 | Gorai.005G178300 | 88.8333  | 320.1667 | 129.3333 | 431.6667 | 0.6869 | 0.7417 | 1.856  | 3.3778 | 0.5495 | 0.9261 | yes                                 |
| Ga03G1811        | Gh_A02G0925      | 89       | 319      | 130      | 431      | 0.6846 | 0.7401 | 1.8298 | 3.2486 | 0.5633 | 0.925  | yes                                 |
| Gorai.004G198100 | Gorai.004G225000 | 156.5    | 629.5    | 224.1667 | 846.8333 | 0.6981 | 0.7434 | 2.0037 | 3.545  | 0.5652 | 0.9392 | yes                                 |
| Gorai.001G058100 | Gorai.001G068000 | 269.5    | 937.5    | 384      | 1260     | 0.7018 | 0.744  | 2.0589 | 3.6272 | 0.5676 | 0.9433 | yes                                 |
| Gh_D05G0049      | Gh_D05G0100      | 398      | 1545     | 601      | 2111     | 0.6622 | 0.7319 | 1.609  | 2.7923 | 0.5762 | 0.9048 | yes                                 |
| Gorai.004G131700 | Gorai.005G013500 | 307.1667 | 1195.833 | 455.1667 | 1626.833 | 0.6748 | 0.7351 | 1.7254 | 2.9374 | 0.5874 | 0.9181 | yes                                 |
| Gh_A07G0445      | Gh_A07G0531      | 279.6667 | 943.3333 | 383      | 1261     | 0.7302 | 0.7481 | 2.7258 | 4.4772 | 0.6088 | 0.9761 | yes                                 |
| Gh_D02G0308      | Gh_D03G1042      | 371.8333 | 1378.167 | 534.3333 | 1862.667 | 0.6959 | 0.7399 | 1.9717 | 3.2298 | 0.6105 | 0.9405 | yes                                 |
| Gh_D07G0509      | Gh_D07G0600      | 274.5    | 938.5    | 384.1667 | 1259.833 | 0.7145 | 0.7449 | 2.2886 | 3.749  | 0.6105 | 0.9592 | yes                                 |
| Gh_D01G0822      | Gh_D02G0308      | 501.3333 | 1903.667 | 719      | 2572     | 0.6973 | 0.7402 | 1.9911 | 3.2495 | 0.6127 | 0.9421 | yes                                 |
| Gh_A11G1536      | Gh_A11G3016      | 242.6667 | 818.3333 | 334.6667 | 1096.333 | 0.7251 | 0.7464 | 2.5539 | 4.0101 | 0.6369 | 0.9714 | yes                                 |
| Gh_A03G0454      | Gh_A03G1178      | 94.8333  | 314.1667 | 135.6667 | 425.3333 | 0.699  | 0.7386 | 2.0164 | 3.1422 | 0.6417 | 0.9464 | yes                                 |
| Gh_D07G0600      | Gh_D07G1556      | 306.6667 | 1132.333 | 442.3333 | 1537.667 | 0.6933 | 0.7364 | 1.9366 | 3.0073 | 0.644  | 0.9415 | yes                                 |
| Gorai.006G206500 | Gorai.006G266900 | 114.3333 | 472.6667 | 161      | 637      | 0.7101 | 0.742  | 2.2011 | 3.4073 | 0.646  | 0.957  | yes                                 |
| Gh_D11G0397      | Gh_D11G0436      | 259.1667 | 892.8333 | 376.5    | 1216.5   | 0.6884 | 0.7339 | 1.874  | 2.8826 | 0.6501 | 0.9379 | yes                                 |
| Gorai.004G101000 | Gorai.004G108400 | 396.1667 | 1473.833 | 552      | 1983     | 0.7177 | 0.7432 | 2.3586 | 3.5311 | 0.6679 | 0.9656 | yes                                 |
| Gh_D07G1556      | Gh_D08G0914      | 507.6667 | 1956.333 | 738.8333 | 2675.167 | 0.6871 | 0.7313 | 1.8591 | 2.7684 | 0.6715 | 0.9396 | yes                                 |
| Gorai.001G068000 | Gorai.001G185100 | 309.5    | 1133.5   | 443.5    | 1542.5   | 0.6979 | 0.7348 | 1.9996 | 2.9264 | 0.6833 | 0.9497 | yes                                 |
| Gh_D05G0138      | Gh_D05G2083      | 115.1667 | 437.8333 | 167.8333 | 600.1667 | 0.6862 | 0.7295 | 1.8482 | 2.7005 | 0.6844 | 0.9406 | yes                                 |
| Gh_D13G2470      | Gh_Sca101252G01  | 53       | 218      | 75.3333  | 296.6667 | 0.7035 | 0.7348 | 2.0861 | 2.9256 | 0.713  | 0.9574 | yes                                 |
| Gh_D03G1084      | Gh_D05G0049      | 270.1667 | 953.8333 | 373.6667 | 1285.333 | 0.723  | 0.7421 | 2.4936 | 3.414  | 0.7304 | 0.9743 | yes                                 |
| Gorai.008G041100 | Gorai.008G049200 | 453.5    | 1648.5   | 627.3333 | 2222.667 | 0.7229 | 0.7417 | 2.4904 | 3.3758 | 0.7377 | 0.9747 | yes                                 |
| Gh_A04G0995      | Gh_A05G0047      | 254.3333 | 848.6667 | 349.5    | 1141.5   | 0.7277 | 0.7435 | 2.6368 | 3.5573 | 0.7412 | 0.9788 | yes                                 |
| Gorai.003G063900 | Gorai.003G120400 | 127.1667 | 453.8333 | 178.6667 | 616.3333 | 0.7118 | 0.7363 | 2.232  | 3.0044 | 0.7429 | 0.9666 | yes                                 |
| Gh_A12G0439      | Gh_A12G1336      | 105.8333 | 369.1667 | 147.8333 | 500.1667 | 0.7159 | 0.7381 | 2.318  | 3.1069 | 0.7461 | 0.9699 | yes                                 |
| Gorai.007G043100 | Gorai.007G046900 | 263.6667 | 898.3333 | 379.1667 | 1234.833 | 0.6954 | 0.7275 | 1.9648 | 2.6297 | 0.7472 | 0.9559 | yes                                 |
| Ga01G2094        | Gh_A01G0794      | 373.3333 | 1352.667 | 536.8333 | 1860.167 | 0.6954 | 0.7272 | 1.9655 | 2.6192 | 0.7504 | 0.9564 | yes                                 |
| Gh_D09G0055      | Gh_D11G0397      | 268      | 899      | 374.3333 | 1218.667 | 0.7159 | 0.7377 | 2.3189 | 3.0823 | 0.7523 | 0.9705 | yes                                 |
| Gorai.007G309200 | Gorai.008G041100 | 372      | 1342     | 508      | 1802     | 0.7323 | 0.7447 | 2.8092 | 3.7183 | 0.7555 | 0.9833 | yes                                 |
| Gh_Sca101252G01  | Gorai.001G058100 | 57.6667  | 207.3333 | 84.1667  | 287.8333 | 0.6851 | 0.7203 | 1.836  | 2.4223 | 0.7579 | 0.9512 | yes                                 |
| Gh_D01G1812      | Gh_D02G1615      | 94.5     | 316.5    | 131.8333 | 429.1667 | 0.7168 | 0.7375 | 2.3385 | 3.0693 | 0.7619 | 0.972  | yes                                 |
| Gorai.002G110000 | Gorai.002G115800 | 417.8333 | 1587.167 | 597.5    | 2180.5   | 0.6993 | 0.7279 | 2.0206 | 2.6431 | 0.7645 | 0.9607 | yes                                 |
| Gh_A05G3757      | Gh_A06G0421      | 225.5    | 778.5    | 321.1667 | 1067.833 | 0.7021 | 0.729  | 2.0637 | 2.6833 | 0.7691 | 0.9631 | yes                                 |
| Gorai.009G348900 | Gorai.010G253900 | 214      | 698      | 308.3333 | 963.6667 | 0.6941 | 0.7243 | 1.9468 | 2.5307 | 0.7693 | 0.9582 | yes                                 |
| Gorai.010G148800 | Gorai.011G138700 | 243.6667 | 809.3333 | 335.8333 | 1092.167 | 0.7256 | 0.741  | 2.5678 | 3.32   | 0.7734 | 0.9791 | yes                                 |
| Gorai.005G227800 | Gorai.006G266700 | 237.1667 | 833.8333 | 322      | 1118     | 0.7365 | 0.7458 | 3.0154 | 3.8934 | 0.7745 | 0.9876 | yes                                 |
| Ga01G2121        | Ga03G0310        | 260      | 940      | 368.1667 | 1287.833 | 0.7062 | 0.7299 | 2.1304 | 2.7148 | 0.7847 | 0.9675 | yes                                 |
| Gh_A02G0239      | Gh_A03G0454      | 260.8333 | 939.1667 | 369      | 1287     | 0.7069 | 0.7297 | 2.1418 | 2.7083 | 0.7908 | 0.9687 | yes                                 |
| Gh_A07G0531      | Gh_A07G1460      | 307.3333 | 1122.667 | 436.6667 | 1543.333 | 0.7038 | 0.7274 | 2.0906 | 2.6276 | 0.7956 | 0.9675 | yes                                 |
| Gorai.001G185100 | Gorai.002G103800 | 309.6667 | 1156.333 | 438.5    | 1586.5   | 0.7062 | 0.7289 | 2.1303 | 2.6766 | 0.7959 | 0.9689 | yes                                 |
| Gorai.005G259100 | Gorai.006G206500 | 383      | 1364     | 519.3333 | 1829.667 | 0.7375 | 0.7455 | 3.0698 | 3.8355 | 0.8004 | 0.9893 | yes                                 |
| Gorai.006G266700 | Gorai.007G043100 | 252.5    | 906.5    | 361      | 1253     | 0.6994 | 0.7235 | 2.0228 | 2.5062 | 0.8071 | 0.9668 | yes                                 |
| Gh_D05G1709      | Gh_A05G3990      | 437.3333 | 1639.667 | 603.3333 | 2219.667 | 0.7249 | 0.7387 | 2.5468 | 3.1464 | 0.8094 | 0.9813 | yes                                 |
| Gorai.009G012400 | Gorai.009G059900 | 336.1667 | 1230.833 | 468.3333 | 1676.667 | 0.7178 | 0.7341 | 2.3609 | 2.8901 | 0.8169 | 0.9778 | yes                                 |
| Gh_A06G0421      | Gh_A07G0445      | 267.8333 | 916.1667 | 380.3333 | 1263.667 | 0.7042 | 0.725  | 2.097  | 2.5511 | 0.822  | 0.9713 | yes                                 |
| Gh_D08G0987      | Gh_D09G0055      | 245.5    | 904.5    | 347      | 1246     | 0.7075 | 0.7259 | 2.1528 | 2.5791 | 0.8347 | 0.9746 | yes                                 |
| Gorai.003G120400 | Gorai.004G101000 | 269      | 943      | 372.8333 | 1286.167 | 0.7215 | 0.7332 | 2.4527 | 2.8484 | 0.8611 | 0.9841 | yes                                 |
| Gorai.002G103800 | Gorai.002G110000 | 310.8333 | 1144.167 | 440.3333 | 1584.667 | 0.7059 | 0.722  | 2.1253 | 2.4665 | 0.8617 | 0.9777 | yes                                 |
| Gh_D01G0769      | Gh_D01G0822      | 310.8333 | 1142.167 | 440.1667 | 1584.833 | 0.7062 | 0.7207 | 2.1298 | 2.4315 | 0.8759 | 0.9799 | yes                                 |
| Gh_D12G0440      | Gh_D13G1358      | 337.6667 | 1208.333 | 467.5    | 1650.5   | 0.7223 | 0.7321 | 2.4735 | 2.8015 | 0.8829 | 0.9866 | yes                                 |
| Gorai.003G074300 | Gorai.003G115800 | 385.6667 | 1352.333 | 538      | 1859     | 0.7169 | 0.7275 | 2.3393 | 2.6283 | 0.89   | 0.9854 | yes                                 |
| Gh_A01G1560      | Gh_A03G0493      | 168.8333 | 577.1667 | 235.8333 | 796.1667 | 0.7159 | 0.7249 | 2.3181 | 2.5489 | 0.9095 | 0.9875 | yes                                 |
| Gh_A13G2318      | Gh_D01G1812      | 178.6667 | 672.3333 | 247.6667 | 922.3333 | 0.7214 | 0.7289 | 2.45   | 2.6798 | 0.9142 | 0.9896 | yes                                 |
| Gh_D05G2522      | Gh_D05G3923      | 212.5    | 758.5    | 305.1667 | 1071.833 | 0.6963 | 0.7077 | 1.9781 | 2.1559 | 0.9175 | 0.984  | yes                                 |
| Gh_A05G0460      | Gh_A05G2263      | 218.3333 | 773.6667 | 305.6667 | 1071.333 | 0.7143 | 0.7222 | 2.2834 | 2.47   | 0.9244 | 0.9891 | yes                                 |
| Gh_A07G1460      | Gh_A08G0768      | 518.1667 | 1903.833 | 737.5    | 2676.5   | 0.7026 | 0.7113 | 2.0711 | 2.2235 | 0.9315 | 0.9877 | yes                                 |
| Gorai.012G040100 | Gorai.013G236600 | 119.5    | 460.5    | 170.3333 | 648.6667 | 0.7016 | 0.7099 | 2.0549 | 2.1969 | 0.9354 | 0.9882 | yes                                 |

|                  |                  |          |          |          |          |        |        |        |        |        |        |     |
|------------------|------------------|----------|----------|----------|----------|--------|--------|--------|--------|--------|--------|-----|
| Gorai.008G193400 | Gorai.009G006600 | 138.5    | 532.5    | 186.6667 | 716.3333 | 0.742  | 0.7434 | 3.4021 | 3.5462 | 0.9594 | 0.9981 | yes |
| Gh_D11G0436      | Gh_D11G1701      | 243.3333 | 798.6667 | 336.6667 | 1100.333 | 0.7228 | 0.7258 | 2.4869 | 2.5766 | 0.9652 | 0.9958 | yes |
| Gh_A06G1787      | Gh_A06G2074      | 209      | 666      | 286.5    | 910.5    | 0.7295 | 0.7315 | 2.6995 | 2.7754 | 0.9727 | 0.9973 | yes |
| Gh_D06G0459      | Gh_D06G2192      | 192.5    | 637.5    | 267      | 882      | 0.721  | 0.7228 | 2.4389 | 2.4873 | 0.9805 | 0.9975 | yes |
| Gh_D11G1701      | Gh_D12G0440      | 235      | 800      | 326.6667 | 1110.333 | 0.7194 | 0.7205 | 2.399  | 2.4269 | 0.9885 | 0.9985 | yes |
| Gorai.005G013500 | Gorai.005G035500 | 320.1667 | 1171.833 | 446.8333 | 1635.167 | 0.7165 | 0.7166 | 2.3319 | 2.3346 | 0.9988 | 0.9998 | yes |
| Gh_D05G3923      | Gh_D06G0459      | 334.6667 | 1203.333 | 462      | 1662     | 0.7244 | 0.724  | 2.5327 | 2.5223 | 1.0041 | 1.0005 | no  |
| Gorai.004G108400 | Gorai.004G109400 | 353.3333 | 1321.667 | 481.6667 | 1804.333 | 0.7336 | 0.7325 | 2.8654 | 2.8182 | 1.0168 | 1.0015 | no  |
| Gorai.009G226800 | Gorai.009G278600 | 216.8333 | 708.1667 | 319.3333 | 1048.667 | 0.679  | 0.6753 | 1.7682 | 1.73   | 1.0221 | 1.0055 | no  |
| Gorai.007G067100 | Gorai.007G184900 | 246.5    | 802.5    | 337      | 1100     | 0.7315 | 0.7295 | 2.7749 | 2.7014 | 1.0272 | 1.0026 | no  |
| Gh_D05G2083      | Gh_D05G2522      | 219      | 714      | 321.3333 | 1055.667 | 0.6815 | 0.6763 | 1.7953 | 1.7406 | 1.0315 | 1.0077 | no  |
| Gh_D06G2192      | Gh_D07G0509      | 200.8333 | 639.1667 | 273.6667 | 875.3333 | 0.7339 | 0.7302 | 2.8791 | 2.7257 | 1.0563 | 1.005  | no  |
| Gh_A09G0059      | Gh_A11G0542      | 204.3333 | 646.6667 | 344      | 1123     | 0.594  | 0.5758 | 1.1776 | 1.0951 | 1.0754 | 1.0315 | no  |
| Gh_A08G0768      | Gh_A08G0810      | 344.1667 | 1295.833 | 475.8333 | 1810.167 | 0.7233 | 0.7159 | 2.5013 | 2.3173 | 1.0794 | 1.0104 | no  |
| Gh_A05G2263      | Gh_A05G3757      | 220.3333 | 708.6667 | 321.6667 | 1055.333 | 0.685  | 0.6715 | 1.834  | 1.6928 | 1.0834 | 1.0201 | no  |
| Gorai.005G178300 | Gorai.006G007000 | 99.5     | 315.5    | 134      | 427      | 0.7425 | 0.7389 | 3.4576 | 3.1582 | 1.0948 | 1.005  | no  |
| Gh_Sca135291G01  | Gorai.003G074300 | 27.8333  | 102.1667 | 39.8333  | 149.1667 | 0.6987 | 0.6849 | 2.0124 | 1.8333 | 1.0977 | 1.0202 | no  |
| Gorai.002G115800 | Gorai.002G206700 | 442.5    | 1588.5   | 600.6667 | 2177.333 | 0.7367 | 0.7296 | 3.0232 | 2.702  | 1.1189 | 1.0098 | no  |
| Gh_A08G0810      | Gh_A09G0059      | 233      | 825      | 324.8333 | 1175.167 | 0.7173 | 0.702  | 2.3493 | 2.0621 | 1.1393 | 1.0217 | no  |
| Gh_D08G0914      | Gh_D08G0987      | 347      | 1297     | 475.5    | 1810.5   | 0.7298 | 0.7164 | 2.7092 | 2.3286 | 1.1634 | 1.0187 | no  |
| Ga03G2697        | Gh_A01G0844      | 394.5    | 1395.5   | 536.1667 | 1935.833 | 0.7358 | 0.7209 | 2.974  | 2.4364 | 1.2206 | 1.0207 | no  |
| Gh_A13G1599      | Gh_A13G2318      | 304.1667 | 1149.833 | 418.1667 | 1633.833 | 0.7274 | 0.7038 | 2.626  | 2.0897 | 1.2566 | 1.0336 | no  |
| Gh_A12G1336      | Gh_A13G1093      | 115.6667 | 356.3333 | 156.1667 | 491.8333 | 0.7407 | 0.7245 | 3.2895 | 2.5361 | 1.2971 | 1.0223 | no  |
| Gh_D04G1546      | Gh_D05G1588      | 221.6667 | 711.3333 | 298.1667 | 973.8333 | 0.7434 | 0.7304 | 3.5534 | 2.7352 | 1.2991 | 1.0178 | no  |
| Gh_D13G1958      | Gh_D13G2470      | 308.3333 | 1161.667 | 419.8333 | 1632.167 | 0.7344 | 0.7117 | 2.9055 | 2.2316 | 1.302  | 1.0319 | no  |
| Gorai.007G046900 | Gorai.007G309200 | 385.1667 | 1300.833 | 519      | 1791     | 0.7421 | 0.7263 | 3.418  | 2.5915 | 1.3189 | 1.0218 | no  |
| Gh_D13G1358      | Gh_D13G1958      | 325.5    | 1143.5   | 451      | 1667     | 0.7217 | 0.686  | 2.4587 | 1.8455 | 1.3323 | 1.0521 | no  |
| Gorai.008G160900 | Gorai.009G114800 | 104.8333 | 336.1667 | 141.6667 | 470.3333 | 0.74   | 0.7147 | 3.2381 | 2.293  | 1.4122 | 1.0353 | no  |
| Gorai.011G138700 | Gorai.012G016100 | 57.8333  | 208.1667 | 77.3333  | 282.6667 | 0.7478 | 0.7364 | 4.3892 | 3.0096 | 1.4584 | 1.0155 | no  |
| Gorai.013G149700 | Gorai.013G214100 | 328.6667 | 1144.333 | 450.1667 | 1667.833 | 0.7301 | 0.6861 | 2.722  | 1.8473 | 1.4735 | 1.0641 | no  |
| Gh_A13G1093      | Gh_A13G1599      | 329      | 1144     | 450.1667 | 1667.833 | 0.7308 | 0.6859 | 2.7505 | 1.845  | 1.4908 | 1.0655 | no  |
| Gorai.009G114800 | Gorai.009G174700 | 214.6667 | 720.3333 | 286.5    | 970.5    | 0.7493 | 0.7422 | 5.204  | 3.4273 | 1.5184 | 1.0095 | no  |
| Gorai.012G145600 | Gorai.013G149700 | 255.3333 | 833.6667 | 341.5    | 1143.5   | 0.7477 | 0.729  | 4.3345 | 2.6834 | 1.6153 | 1.0256 | no  |
| Gh_Sca004734G01  | Gh_Sca135291G01  | 32.1667  | 101.8333 | 43.3333  | 145.6667 | 0.7423 | 0.6991 | 3.4349 | 2.0174 | 1.7026 | 1.0618 | no  |
| Gorai.004G109400 | Gorai.004G131700 | 362.8333 | 1288.167 | 485.6667 | 1800.333 | 0.7471 | 0.7155 | 4.1622 | 2.3097 | 1.802  | 1.0441 | no  |
| Gorai.010G253900 | Gorai.012G145600 | 223.6667 | 696.3333 | 299.1667 | 972.8333 | 0.7476 | 0.7158 | 4.3186 | 2.3154 | 1.8652 | 1.0445 | no  |
| Gorai.003G002500 | Gorai.003G063900 | 129.1667 | 444.8333 | 172.6667 | 622.3333 | 0.7481 | 0.7148 | 4.4717 | 2.2939 | 1.9494 | 1.0466 | no  |
| Gh_A03G1567      | Gh_A04G0995      | 220.8333 | 519.1667 | 338.8333 | 1101.167 | 0.6517 | 0.4715 | 1.5244 | 0.7429 | 2.0519 | 1.3824 | no  |
| Gh_D02G2018      | Gh_D04G1546      | 219      | 514      | 337.3333 | 1102.667 | 0.6492 | 0.4661 | 1.5053 | 0.7287 | 2.0657 | 1.3927 | no  |
| Ga01G1008        | Gh_A01G0750      | 8        | 6        | 443      | 1582     | 0.0181 | 0.0038 | 0.0183 | 0.0038 | 4.8075 | 4.7615 | no  |
