# Supplementary material for: Map-Based Functional Analysis of the GhNLP Genes Reveals Their Roles in Enhancing Tolerance to N-Deficiency in Cotton
Source: MDPI journal article supplement (doi:10.3390/ijms20194953), 2019-10-08
Supplement: s1 [file s1]

**Table S1: Physiochemical properties of the NLP proteins in AD, A and D cotton genomes**  
**A. Physiochemical properties of the proteins encoded by the *NLP* genes in *G. hirsutum***

| Gene ID     | Domain type | Chro. | Start       | End         | Strand | Length (bp) | Transcript Length (bp) | CDS Length (bp) | CDS GC Content (%) | Exon Number | Mean Exon Length (bp) | Mean Intron Length (bp) | Protein Length (aa) | Molecular Weight (kDa) | Charge | Isoelectric Point | GRAVY  | Subcellular localization |
|-------------|-------------|-------|-------------|-------------|--------|-------------|------------------------|-----------------|--------------------|-------------|-----------------------|-------------------------|---------------------|------------------------|--------|-------------------|--------|--------------------------|
| Gh_A01G0750 | PB1         | A01   | 14,376,117  | 14,378,141  | -      | 2,025       | 2,025                  | 2,025           | 45.8               | 1           | 2,025.00              | No intron               | 674                 | 74.404                 | -20    | 4.835             | -0.496 | nucl                     |
| Gh_A01G0794 | PB1         | A01   | 17,401,444  | 17,409,421  | +      | 7,978       | 3,732                  | 3,732           | 41.5               | 7           | 533.1                 | 707.7                   | 1,243               | 138.311                | -23    | 5.351             | NA     | E.R.                     |
| Gh_A01G0844 | NLP4        | A01   | 19,416,521  | 19,419,606  | -      | 3,086       | 2,721                  | 2,721           | 42.4               | 4           | 680.3                 | 121.7                   | 906                 | 100.919                | 8      | 6.906             | -0.457 | nucl                     |
| Gh_A01G1468 | NLP2        | A01   | 89,923,386  | 89,926,969  | +      | 3,584       | 2,796                  | 2,796           | 44.9               | 4           | 699                   | 262.7                   | 931                 | 102.683                | -8     | 5.996             | -0.422 | nucl                     |
| Gh_A01G1560 | PB1         | A01   | 92,419,665  | 92,421,097  | -      | 1,433       | 1,032                  | 1,032           | 47.9               | 2           | 516                   | 401                     | 343                 | 37.921                 | 9      | 8.087             | -0.705 | plas                     |
| Gh_A02G0102 | NLP8        | A02   | 931,389     | 935,261     | -      | 3,873       | 2,979                  | 2,979           | 42.5               | 5           | 595.8                 | 223.5                   | 992                 | 110.336                | -11.5  | 5.71              | NA     | plas                     |
| Gh_A02G0239 | PB1         | A02   | 2,978,559   | 2,983,643   | -      | 5,085       | 3,291                  | 3,291           | 40.9               | 9           | 365.7                 | 224.3                   | 1,096               | 122.017                | 10     | 6.857             | -0.615 | plas                     |
| Gh_A02G0925 | NLP8        | A02   | 35,249,348  | 35,255,298  | -      | 5,951       | 2,979                  | 2,979           | 44                 | 5           | 595.8                 | 743                     | 992                 | 108.971                | -14    | 5.421             | -0.421 | E.R.                     |
| Gh_A02G0949 | NLP7        | A02   | 39,455,243  | 39,459,094  | +      | 3,852       | 2,961                  | 2,961           | 43.7               | 5           | 592.2                 | 222.8                   | 986                 | 108.813                | -4     | 6.322             | -0.408 | plas                     |
| Gh_A02G1702 | RWP-RK      | A02   | 83,207,000  | 83,214,947  | -      | 7,948       | 1,026                  | 1,026           | 42.7               | 5           | 205.2                 | 1,730.50                | 341                 | 39.437                 | 13     | 9.42              | -0.468 | nucl                     |
| Gh_A03G0443 | RWP-RK      | A03   | 9,533,163   | 9,534,253   | +      | 1,091       | 720                    | 720             | 39.7               | 3           | 240                   | 185.5                   | 239                 | 27.795                 | -2     | 6.107             | -0.578 | nucl                     |
| Gh_A03G0454 | PB1         | A03   | 9,917,433   | 9,922,383   | -      | 4,951       | 1,656                  | 1,656           | 43.9               | 14          | 118.3                 | 253.5                   | 551                 | 59.923                 | 3      | 7.053             | -0.222 | nucl                     |
| Gh_A03G0493 | PB1         | A03   | 11,495,867  | 11,499,341  | -      | 3,475       | 2,397                  | 2,397           | 44.1               | 7           | 342.4                 | 179.7                   | 798                 | 86.572                 | -22.5  | 4.67              | -0.33  | E.R.                     |
| Gh_A03G1178 | PB1         | A03   | 84,402,981  | 84,403,686  | -      | 706         | 561                    | 561             | 49.9               | 2           | 280.5                 | 145                     | 186                 | 20.594                 | 9.5    | 9.567             | -0.397 | nucl                     |
| Gh_A03G1567 | PB1         | A03   | 96,897,807  | 96,899,246  | -      | 1,440       | 1,440                  | 1,440           | 52.4               | 1           | 1,440.00              | No intron               | 479                 | 52.125                 | -2.5   | 6.195             | -0.576 | plas                     |
| Gh_A03G1857 | NLP2        | A03   | 99,615,766  | 99,619,026  | +      | 3,261       | 2,352                  | 2,352           | 44.4               | 4           | 588                   | 303                     | 783                 | 87.029                 | 7.5    | 7.088             | -0.365 | nucl                     |
| Gh_A04G0995 | PB1         | A04   | 59,881,093  | 59,882,583  | -      | 1,491       | 1,491                  | 1,491           | 52.1               | 1           | 1,491.00              | No intron               | 496                 | 54.052                 | -2.5   | 6.145             | -0.582 | plas                     |
| Gh_A05G0047 | PB1         | A05   | 699,481     | 704,953     | -      | 5,473       | 4,206                  | 4,206           | 44.1               | 9           | 467.3                 | 158.4                   | 1,401               | 151.42                 | -25.5  | 5.163             | -0.425 | nucl                     |
| Gh_A05G0079 | PB1         | A05   | 956,169     | 957,206     | +      | 1,038       | 762                    | 762             | 46.5               | 4           | 190.5                 | 92                      | 253                 | 28.112                 | 4.5    | 7.695             | -0.581 | E.R.                     |
| Gh_A05G0460 | PB1         | A05   | 5,042,064   | 5,044,302   | -      | 2,239       | 2,145                  | 2,145           | 43                 | 2           | 1,072.50              | 94                      | 714                 | 81.039                 | -16.5  | 5.031             | -0.496 | nucl                     |
| Gh_A05G1538 | NLP4        | A05   | 15,633,286  | 15,636,755  | -      | 3,470       | 2,787                  | 2,787           | 42.5               | 4           | 696.8                 | 227.7                   | 928                 | 103.32                 | 6      | 6.84              | -0.515 | nucl                     |
| Gh_A05G2263 | PB1         | A05   | 26,483,791  | 26,485,167  | +      | 1,377       | 1,377                  | 1,377           | 50.5               | 1           | 1,377.00              | No intron               | 458                 | 49.379                 | -10    | 4.756             | -0.399 | nucl                     |
| Gh_A05G3286 | PB1         | A05   | 86,197,819  | 86,200,325  | -      | 2,507       | 819                    | 819             | 45.8               | 4           | 204.8                 | 562.7                   | 272                 | 30.036                 | 4.5    | 7.7               | -0.785 | E.R.                     |
| Gh_A05G3757 | PB1         | A05   | 20,025      | 21,413      | -      | 1,389       | 1,389                  | 1,389           | 47.7               | 1           | 1,389.00              | No intron               | 462                 | 50.379                 | -14    | 4.536             | -0.324 | E.R.                     |
| Gh_A05G3990 | PB1         | A05   | 8,700       | 15,001      | -      | 6,302       | 3,306                  | 3,306           | 41.8               | 8           | 413.3                 | 428                     | 1,101               | 122.187                | -23.5  | 5.639             | -0.446 | E.R.                     |
| Gh_A06G0421 | PB1         | A06   | 7,213,066   | 7,218,001   | -      | 4,936       | 4,086                  | 4,086           | 44                 | 9           | 454                   | 106.3                   | 1,361               | 147.795                | -36    | 5.054             | -0.425 | E.R.                     |
| Gh_A06G1787 | PB1         | A06   | 102,823,406 | 102,824,767 | -      | 1,362       | 1,197                  | 1,197           | 49.5               | 2           | 598.5                 | 165                     | 398                 | 43.914                 | -7     | 5.518             | -0.686 | E.R.                     |
| Gh_A06G2074 | PB1         | A06   | 264,938     | 268,653     | +      | 3,716       | 1,467                  | 1,467           | 51.4               | 3           | 489                   | 1,124.50                | 488                 | 53.145                 | 1      | 6.615             | -0.387 | nucl                     |
| Gh_A07G0445 | PB1         | A07   | 5,749,406   | 5,756,868   | +      | 7,463       | 1,644                  | 1,644           | 43.1               | 14          | 117.4                 | 447.6                   | 547                 | 59.991                 | 2      | 6.852             | -0.218 | E.R.                     |
| Gh_A07G0531 | PB1         | A07   | 7,066,078   | 7,068,526   | -      | 2,449       | 1,980                  | 1,980           | 44.5               | 2           | 990                   | 469                     | 659                 | 72.175                 | -12.5  | 5.089             | -0.571 | plas                     |
| Gh_A07G1460 | PB1         | A07   | 42,732,155  | 42,738,346  | +      | 6,192       | 3,693                  | 3,693           | 41.5               | 9           | 410.3                 | 312.4                   | 1,230               | 135.77                 | -10    | 6.063             | -0.51  | plas                     |
| Gh_A08G0768 | PB1         | A08   | 28,507,225  | 28,514,227  | +      | 7,003       | 3,414                  | 3,414           | 42.7               | 8           | 426.8                 | 512.7                   | 1,137               | 126.045                | -19    | 5.835             | -0.572 | E.R.                     |
| Gh_A08G0810 | PB1         | A08   | 36,708,955  | 36,711,334  | -      | 2,380       | 2,286                  | 2,286           | 40.7               | 2           | 1,143.00              | 94                      | 761                 | 87.405                 | -6     | 6.011             | -0.67  | nucl                     |
| Gh_A08G1723 | PB1         | A08   | 97,169,738  | 97,176,030  | +      | 6,293       | 3,834                  | 3,834           | 41.5               | 8           | 479.3                 | 351.3                   | 1,277               | 140.371                | -37.5  | 4.756             | -0.459 | plas                     |
| Gh_A09G0059 | PB1         | A09   | 1,305,385   | 1,310,594   | +      | 5,210       | 1,500                  | 1,500           | 43.7               | 12          | 125                   | 337.3                   | 500                 | 54.211                 | 6.5    | 7.422             | -0.164 | nucl                     |
| Gh_A09G1689 | NLP7        | A09   | 70,394,150  | 70,398,090  | -      | 3,941       | 2,913                  | 2,913           | 45.2               | 5           | 582.6                 | 257                     | 970                 | 106.503                | -14    | 5.279             | -0.362 | plas                     |
| Gh_A09G2142 | RWP-RK      | A09   | 74,495,305  | 74,496,378  | +      | 1,074       | 846                    | 846             | 37.1               | 4           | 211.5                 | 76                      | 281                 | 32.752                 | -4     | 5.203             | -0.904 | nucl                     |
| Gh_A10G1257 | NLP8        | A10   | 65,745,295  | 65,750,705  | +      | 5,411       | 2,856                  | 2,856           | 42.7               | 5           | 571.2                 | 638.8                   | 951                 | 104.211                | -19    | 5.012             | -0.399 | E.R.                     |
| Gh_A11G0376 | PB1         | A11   | 3,452,434   | 3,455,210   | -      | 2,777       | 2,343                  | 2,343           | 44                 | 6           | 390.5                 | 86.8                    | 780                 | 84.497                 | -32.5  | 4.418             | -0.232 | mito                     |
| Gh_A11G0542 | PB1         | A11   | 5,111,393   | 5,117,277   | +      | 5,885       | 1,467                  | 1,467           | 44.6               | 13          | 112.8                 | 368.2                   | 488                 | 53.209                 | 4.5    | 7.284             | -0.05  | nucl                     |
| Gh_A11G1536 | PB1         | A11   | 22,168,865  | 22,170,634  | -      | 1,770       | 1,431                  | 1,431           | 47.4               | 2           | 715.5                 | 339                     | 476                 | 52.1                   | 0.5    | 6.552             | -0.462 | plas                     |
| Gh_A11G3016 | PB1         | A11   | 24,001      | 28,527      | -      | 4,527       | 1,614                  | 1,614           | 43.2               | 14          | 115.3                 | 224.1                   | 537                 | 58.507                 | 8.5    | 8.358             | -0.145 | nucl                     |
| Gh_A12G0297 | NLP2        | A12   | 5,073,568   | 5,077,178   | -      | 3,611       | 2,850                  | 2,850           | 44.1               | 4           | 712.5                 | 253.7                   | 949                 | 104.234                | 4      | 6.806             | -0.424 | nucl                     |
| Gh_A12G0439 | PB1         | A12   | 9,234,626   | 9,240,522   | -      | 5,897       | 3,936                  | 3,936           | 43.3               | 8           | 492                   | 280.1                   | 1,311               | 144.62                 | -23    | 5.338             | -0.549 | nucl                     |
| Gh_A12G1336 | PB1         | A12   | 70,263,427  | 70,264,159  | +      | 733         | 648                    | 648             | 45.8               | 2           | 324                   | 85                      | 215                 | 23.861                 | 16.5   | 9.722             | -0.361 | extr                     |
| Gh_A12G1611 | RWP-RK      | A12   | 77,108,077  | 77,109,325  | +      | 1,249       | 912                    | 912             | 42.8               | 4           | 228                   | 112.3                   | 303                 | 35.003                 | -1     | 6.003             | -0.641 | E.R.                     |
| Gh_A13G1093 | PB1         | A13   | 61,245,484  | 61,247,601  | +      | 2,118       | 2,118                  | 2,118           | 45.1               | 1           | 2,118.00              | No intron               | 705                 | 77.988                 | -15.5  | 5.059             | -0.49  | plas                     |
| Gh_A13G1599 | PB1         | A13   | 74,873,340  | 74,875,635  | +      | 2,296       | 2,178                  | 2,178           | 44.1               | 2           | 1,089.00              | 118                     | 725                 | 82.002                 | -9.5   | 5.348             | -0.51  | nucl                     |
| Gh_A13G2318 | PB1         | A13   | 53,502      | 55,644      | -      | 2,143       | 2,052                  | 2,052           | 41.4               | 2           | 1,026.00              | 91                      | 683                 | 78.805                 | -6.5   | 5.84              | -0.622 | nucl                     |
| Gh_D01G0769 | PB1         | D01   | 11,024,851  | 11,026,875  | -      | 2,025       | 2,025                  | 2,025           | 45.7               | 1           | 2,025.00              | No intron               | 674                 | 74.46                  | -23    | 4.749             | -0.529 | nucl                     |
| Gh_D01G0822 | PB1         | D01   | 13,055,087  | 13,062,895  | +      | 7,809       | 3,648                  | 3,648           | 41.9               | 8           | 456                   | 594.4                   | 1,215               | 135.149                | -26    | 5.22              | -0.587 | nucl                     |
| Gh_D01G0872 | NLP4        | D01   | 14,334,933  | 14,338,016  | -      | 3,084       | 2,721                  | 2,721           | 42.6               | 4           | 680.3                 | 121                     | 906                 | 100.83                 | 9      | 6.963             | -0.478 | nucl                     |
| Gh_D01G1705 | NLP2        | D01   | 53,558,837  | 53,562,425  | +      | 3,589       | 2,799                  | 2,799           | 45                 | 4           | 699.8                 | 263.3                   | 932                 | 103.031                | -11.5  | 5.764             | -0.432 | nucl                     |
| Gh_D01G1812 | PB1         | D01   | 55,593,773  | 55,596,257  | +      | 2,485       | 1,170                  | 1,170           | 48.4               | 3           | 390                   | 657.5                   | 389                 | 42.705                 | 16.5   | 9.222             | -0.586 | plas                     |
| Gh_D02G0126 | NLP8        | D02   | 1,020,153   | 1,023,933   | -      | 3,781       | 2,907                  | 2,907           | 42.5               | 5           | 581.4                 | 218.5                   | 968                 | 107.451                | -11    | 5.716             | -0.446 | nucl                     |
| Gh_D02G0308 | PB1         | D02   | 4,200,579   | 4,205,625   | -      | 5,047       | 3,291                  | 3,291           | 41.4               | 9           | 365.7                 | 219.5                   | 1,096               | 122.036                | 16.5   | 7.161             | -0.625 | plas                     |
| Gh_D02G1107 | NLP8        | D02   | 31,070,010  | 31,075,995  | -      | 5,986       | 2,988                  | 2,988           | 43.9               | 5           | 597.6                 | 749.5                   | 995                 | 109.241                | -12.5  | 5.564             | -0.416 | E.R.                     |
| Gh_D02G1209 | RWP-RK      | D02   | 37,862,884  | 37,865,311  | +      | 2,428       | 420                    | 420             | 42.4               | 5           | 84                    | 502                     | 139                 | 15.305                 | -2.5   | 5.087             | 0.399  | nucl                     |
| Gh_D02G1615 | PB1         | D02   | 55,879,955  | 55,880,661  | -      | 707         | 561                    | 561             | 50.1               | 2           | 280.5                 | 146                     | 186                 | 20.46                  | 9      | 9.276             | -0.32  | nucl                     |
| Gh_D02G2018 | PB1         | D02   | 64,467,830  | 64,469,269  | -      | 1,440       | 1,440                  | 1,440           | 52.6               | 1           | 1,440.00              | No intron               | 479                 | 52.184                 | -2.5   | 6.195             | -0.6   | plas                     |
| Gh_D02G2296 | NLP2        | D02   | 66,690,173  | 66,693,334  | +      | 3,162       | 2,349                  | 2,349           | 44.7               | 4           | 587.3                 | 271                     | 782                 | 87.41                  | 13     | 7.741             | -0.405 | nucl                     |
| Gh_D03G0017 | RWP-RK      | D03   | 153,427     | 156,080     | +      | 2,654       | 1,011                  | 1,011           | 43.6               | 5           | 202.2                 | 410.8                   | 336                 | 38.769                 | 17     | 10.02             | -0.487 | nucl                     |
| Gh_D03G0813 | NLP7        | D03   | 27,828,859  | 27,832,737  | -      | 3,879       | 3,021                  | 3,021           | 43.7               | 5           | 604.2                 | 214.5                   | 1,006               | 111.275                | -2     | 6.42              | NA     | plas                     |
| Gh_D03G1042 | PB1         | D03   | 35,274,434  | 35,277,944  | +      | 3,511       | 2,397                  | 2,397           | 43.9               | 7           | 342.4                 | 185.7                   | 798                 | 86.478                 | -18.5  | 4.822             | -0.324 | E.R.                     |
| Gh_D03G1084 | PB1         | D03   | 36,248,755  | 36,253,730  | +      | 4,976       | 1,659                  | 1,659           | 43.9               | 14          | 118.5                 | 255.2                   | 552                 | 60.22                  | 4.5    | 7.328             | -0.238 | nucl                     |
| Gh_D03G1095 | RWP-RK      | D03   | 36,520,900  | 36,521,990  | -      | 1,091       | 723                    | 723             | 40.2               | 3           | 241                   | 184                     | 240                 | 27.833                 | -1     | 6.314             | -0.57  | nucl                     |
| Gh_D04G031  |             |       |             |             |        |             |                        |                 |                    |             |                       |                         |                     |                        |        |                   |        |                          |

|                 |        |          |            |            |   |       |       |       |      |    |          |           |       |         |       |        |        |      |
|-----------------|--------|----------|------------|------------|---|-------|-------|-------|------|----|----------|-----------|-------|---------|-------|--------|--------|------|
| Gh_D05G1588     | PB1    | D05      | 14,366,395 | 14,367,742 | + | 1,348 | 1,272 | 1,272 | 50.7 | 2  | 636      | 76        | 423   | 46.722  | -7    | 5.664  | -0.607 | E.R. |
| Gh_D05G1709     | NLP4   | D05      | 15,401,829 | 15,405,432 | - | 3,604 | 2,823 | 2,823 | 42.1 | 5  | 564.6    | 195.3     | 940   | 104.656 | 5.5   | 6.765  | -0.481 | nucl |
| Gh_D05G2083     | PB1    | D05      | 19,371,700 | 19,373,088 | + | 1,389 | 1,389 | 1,389 | 48   | 1  | 1,389.00 | No intron | 462   | 50.303  | -13   | 4.589  | -0.329 | E.R. |
| Gh_D05G2521     | PB1    | D05      | 25,449,304 | 25,454,365 | - | 5,062 | 378   | 378   | 48.9 | 7  | 54       | 780.7     | 125   | 13.946  | 8.5   | 10.149 | -0.059 | nucl |
| Gh_D05G2522     | PB1    | D05      | 25,456,450 | 25,457,826 | + | 1,377 | 1,377 | 1,377 | 50.8 | 1  | 1,377.00 | No intron | 458   | 49.37   | -10   | 4.756  | -0.412 | nucl |
| Gh_D05G3139     | PB1    | D05      | 46,703,110 | 46,706,616 | - | 3,507 | 2,130 | 2,130 | 49.9 | 2  | 1,065.00 | 1,377.00  | 709   | 76.642  | -5.5  | 6.089  | -0.603 | plas |
| Gh_D05G3923     | PB1    | D05      | 39,779     | 41,995     | + | 2,217 | 2,124 | 2,124 | 43   | 2  | 1,062.00 | 93        | 707   | 80.207  | -15.5 | 5.056  | -0.476 | nucl |
| Gh_D06G0459     | PB1    | D06      | 6,615,706  | 6,620,638  | - | 4,933 | 4,083 | 4,083 | 44.2 | 9  | 453.7    | 106.3     | 1,360 | 147.581 | -36   | 5.055  | -0.408 | E.R. |
| Gh_D06G1329     | PB1    | D06      | 40,480,075 | 40,484,082 | - | 4,008 | 1,428 | 1,428 | 50.6 | 4  | 357      | 860       | 475   | 51.769  | 3     | 6.839  | -0.47  | nucl |
| Gh_D06G2192     | PB1    | D06      | 63,659,979 | 63,661,339 | + | 1,361 | 1,149 | 1,149 | 49.1 | 2  | 574.5    | 212       | 382   | 42.042  | -7    | 5.509  | -0.688 | nucl |
| Gh_D07G0509     | PB1    | D07      | 5,766,090  | 5,773,486  | + | 7,397 | 1,644 | 1,644 | 43.4 | 14 | 117.4    | 442.5     | 547   | 59.892  | 3     | 7.046  | -0.22  | E.R. |
| Gh_D07G0600     | PB1    | D07      | 6,876,233  | 6,878,685  | - | 2,453 | 1,980 | 1,980 | 44.5 | 2  | 990      | 473       | 659   | 72.154  | -13.5 | 5.008  | -0.571 | plas |
| Gh_D07G1556     | PB1    | D07      | 29,200,757 | 29,207,952 | + | 7,196 | 3,858 | 3,858 | 41.8 | 10 | 385.8    | 370.9     | 1,285 | 141.359 | -20   | 5.436  | -0.511 | plas |
| Gh_D08G0914     | PB1    | D08      | 18,932,672 | 18,939,511 | + | 6,840 | 3,414 | 3,414 | 42.7 | 8  | 426.8    | 489.4     | 1,137 | 126.177 | -20   | 5.792  | -0.576 | E.R. |
| Gh_D08G0987     | PB1    | D08      | 24,127,452 | 24,129,831 | - | 2,380 | 2,286 | 2,286 | 40.6 | 2  | 1,143.00 | 94        | 761   | 87.456  | -7.5  | 5.903  | -0.638 | nucl |
| Gh_D08G1195     | NLP7   | D08      | 38,442,816 | 38,447,910 | - | 5,095 | 2,961 | 2,961 | 44.4 | 5  | 592.2    | 533.5     | 986   | 108.589 | -11   | 5.707  | -0.338 | plas |
| Gh_D08G1828     | RWP-RK | D08      | 55,164,242 | 55,165,790 | + | 1,549 | 1,050 | 1,050 | 43.1 | 6  | 175      | 99.8      | 349   | 39.63   | -3    | 6.006  | -0.714 | E.R. |
| Gh_D08G2074     | PB1    | D08      | 59,580,227 | 59,586,431 | + | 6,205 | 3,840 | 3,840 | 41.5 | 8  | 480      | 337.9     | 1,279 | 140.758 | -41   | 4.682  | -0.452 | plas |
| Gh_D09G0055     | PB1    | D09      | 1,421,667  | 1,427,838  | + | 6,172 | 1,593 | 1,593 | 44.3 | 14 | 113.8    | 352.2     | 530   | 57.27   | 8     | 7.733  | -0.144 | nucl |
| Gh_D09G1795     | NLP7   | D09      | 45,604,537 | 45,608,478 | - | 3,942 | 2,913 | 2,913 | 45.5 | 5  | 582.6    | 257.3     | 970   | 106.307 | -19.5 | 4.979  | -0.357 | plas |
| Gh_D10G1228     | NLP8   | D10      | 21,658,426 | 21,663,753 | - | 5,328 | 2,856 | 2,856 | 42.4 | 5  | 571.2    | 618       | 951   | 104.239 | -21.5 | 4.939  | -0.393 | E.R. |
| Gh_D11G0397     | PB1    | D11      | 3,340,844  | 3,345,359  | - | 4,516 | 1,614 | 1,614 | 43.3 | 14 | 115.3    | 223.2     | 537   | 58.482  | 8.5   | 8.358  | -0.15  | nucl |
| Gh_D11G0436     | PB1    | D11      | 3,669,127  | 3,672,465  | - | 3,339 | 2,352 | 2,352 | 44.2 | 7  | 336      | 164.5     | 783   | 84.638  | -35.5 | 4.374  | -0.23  | nucl |
| Gh_D11G0626     | PB1    | D11      | 5,464,000  | 5,470,690  | + | 6,691 | 1,593 | 1,593 | 45.4 | 14 | 113.8    | 392.2     | 530   | 57.676  | 4     | 7.137  | -0.107 | nucl |
| Gh_D11G1701     | PB1    | D11      | 18,528,997 | 18,530,772 | - | 1,776 | 1,437 | 1,437 | 47.6 | 2  | 718.5    | 339       | 478   | 52.273  | -0.5  | 6.467  | -0.456 | plas |
| Gh_D12G0368     | NLP2   | D12      | 5,577,963  | 5,581,575  | + | 3,613 | 2,850 | 2,850 | 44.3 | 4  | 712.5    | 254.3     | 949   | 104.371 | 1.5   | 6.623  | -0.433 | nucl |
| Gh_D12G0440     | PB1    | D12      | 7,218,930  | 7,224,968  | - | 6,039 | 3,936 | 3,936 | 43.2 | 8  | 492      | 300.4     | 1,311 | 144.614 | -22.5 | 5.337  | -0.547 | nucl |
| Gh_D12G1752     | RWP-RK | D12      | 49,834,793 | 49,836,064 | + | 1,272 | 903   | 903   | 43.3 | 4  | 225.8    | 123       | 300   | 34.592  | 0.5   | 6.755  | -0.68  | E.R. |
| Gh_D13G1358     | PB1    | D13      | 42,604,587 | 42,606,704 | + | 2,118 | 2,118 | 2,118 | 45.3 | 1  | 2,118.00 | No intron | 705   | 78.358  | -12   | 5.298  | -0.541 | E.R. |
| Gh_D13G1958     | PB1    | D13      | 54,986,437 | 54,988,732 | + | 2,296 | 2,178 | 2,178 | 44.7 | 2  | 1,089.00 | 118       | 725   | 81.947  | -6.5  | 5.617  | -0.523 | nucl |
| Gh_D13G2470     | PB1    | D13      | 37,306     | 39,440     | + | 2,135 | 2,052 | 2,052 | 41.7 | 2  | 1,026.00 | 83        | 683   | 78.603  | -2.5  | 6.295  | -0.585 | nucl |
| Gh_Sca004734G01 | PB1    | scaffold | 7,350      | 8,697      | - | 1,348 | 1,272 | 1,272 | 50.9 | 2  | 636      | 76        | 423   | 46.38   | -6.5  | 5.677  | -0.538 | nucl |
| Gh_Sca101252G01 | PB1    | scaffold | 68         | 439        | - | 372   | 372   | 372   | 40.6 | 1  | 372      | No intron | 124   | 14.316  | -7    | 4.372  | -0.429 | mito |
| Gh_Sca135291G01 | PB1    | scaffold | 120        | 308        | - | 189   | 189   | 189   | 49.2 | 1  | 189      | No intron | 63    | 7.169   | -7.5  | 4.006  | -0.717 | mito |

**B. Physiochemical properties of the proteins encoded by the NLP genes in *G. arboreum***

| Gene ID   | Gene Name | Chro. | Start       | End         | Strand | Length (bp) | Transcript Length (bp) | CDS Length (bp) | CDS GC Content (%) | Exon Number | Mean Exon Length (bp) | Mean Intron Length (bp) | Protein Length (aa) | Molecular Weight (kDa) | Charge | pI    | GRAVY  | Subcellular localization |
|-----------|-----------|-------|-------------|-------------|--------|-------------|------------------------|-----------------|--------------------|-------------|-----------------------|-------------------------|---------------------|------------------------|--------|-------|--------|--------------------------|
| Ga01G1008 | PB1       | Chr01 | 15,473,058  | 15,475,082  | -      | 2,025       | 2,025                  | 2,025           | 45.6               | 1           | 2,025.00              | No intron               | 674                 | 74.464                 | -21.5  | 4.773 | -0.501 | nucl                     |
| Ga01G1064 | PB1       | Chr01 | 19,142,010  | 19,150,106  | +      | 8,097       | 3,660                  | 3,660           | 41.4               | 8           | 457.5                 | 633.9                   | 1,219               | 135.556                | -20.5  | 5.496 | -0.627 | E.R.                     |
| Ga01G1125 | NLP4      | Chr01 | 21,025,005  | 21,028,146  | -      | 3,142       | 2,778                  | 2,778           | 42.5               | 4           | 694.5                 | 121.3                   | 925                 | 102.859                | 6      | 6.798 | -0.452 | nucl                     |
| Ga01G1831 | NLP7      | Chr01 | 85,611,469  | 85,615,321  | -      | 3,853       | 2,922                  | 2,922           | 43.9               | 6           | 487                   | 186.2                   | 973                 | 107.191                | -5     | 6.274 | -0.389 | plas                     |
| Ga01G2094 | PB1       | Chr01 | 99,418,463  | 99,421,937  | +      | 3,475       | 2,397                  | 2,397           | 44.2               | 7           | 342.4                 | 179.7                   | 798                 | 86.5                   | -19    | 4.795 | -0.338 | E.R.                     |
| Ga01G2121 | PB1       | Chr01 | 100,608,969 | 100,613,915 | -      | 4,947       | 1,656                  | 1,656           | 43.8               | 14          | 118.3                 | 253.2                   | 551                 | 59.923                 | 3      | 7.053 | -0.222 | nucl                     |
| Ga01G2168 | RWP-RK    | Chr01 | 102,164,669 | 102,165,757 | +      | 1,089       | 720                    | 720             | 39.7               | 3           | 240                   | 184.5                   | 239                 | 27.838                 | -1     | 6.315 | -0.582 | nucl                     |
| Ga02G0022 | RWP-RK    | Chr02 | 295,220     | 297,878     | +      | 2,659       | 966                    | 966             | 43.9               | 5           | 193.2                 | 423.3                   | 321                 | 36.948                 | 13     | 9.571 | -0.53  | nucl                     |
| Ga02G1194 | NLP2      | Chr02 | 88,655,571  | 88,659,153  | +      | 3,583       | 2,796                  | 2,796           | 45                 | 4           | 699                   | 262.3                   | 931                 | 102.492                | -8     | 5.997 | -0.439 | nucl                     |
| Ga02G1330 | RWP-RK    | Chr02 | 91,581,780  | 91,584,298  | -      | 2,519       | 1,098                  | 1,098           | 47.6               | 4           | 274.5                 | 473.7                   | 365                 | 40.418                 | 12     | 8.388 | -0.606 | plas                     |
| Ga03G0114 | NLP8      | Chr03 | 933,118     | 936,979     | -      | 3,862       | 2,970                  | 2,970           | 42.4               | 5           | 594                   | 223                     | 989                 | 109.873                | -10.5  | 5.785 | -0.45  | plas                     |
| Ga03G0310 | PB1       | Chr03 | 3,414,164   | 3,419,248   | -      | 5,085       | 3,291                  | 3,291           | 41                 | 9           | 365.7                 | 224.3                   | 1,096               | 122.109                | 10.5   | 6.885 | -0.624 | plas                     |
| Ga03G0673 | PB1       | Chr03 | 10,137,142  | 10,139,571  | -      | 2,430       | 2,226                  | 2,226           | 43.1               | 2           | 1,113.00              | 204                     | 741                 | 83.413                 | 18     | 8.11  | -0.305 | E.R.                     |
| Ga03G1010 | NLP8      | Chr03 | 30,544,953  | 30,550,898  | +      | 5,946       | 2,979                  | 2,979           | 44                 | 5           | 595.8                 | 741.8                   | 992                 | 108.906                | -13    | 5.495 | -0.425 | E.R.                     |
| Ga03G1811 | PB1       | Chr03 | 118,194,702 | 118,195,407 | -      | 706         | 561                    | 561             | 49.7               | 2           | 280.5                 | 145                     | 186                 | 20.564                 | 9      | 9.251 | -0.358 | nucl                     |
| Ga03G2357 | RWP-RK    | Chr03 | 132,187,980 | 132,189,419 | -      | 1,440       | 1,440                  | 1,440           | 52.3               | 1           | 1,440.00              | No intron               | 479                 | 52.135                 | -2.5   | 6.195 | -0.578 | plas                     |
| Ga03G2697 | NLP2      | Chr03 | 135,003,180 | 135,007,468 | +      | 4,289       | 2,472                  | 2,472           | 43.8               | 5           | 494.4                 | 454.3                   | 823                 | 91.73                  | 8.5    | 7.177 | -0.287 | nucl                     |
| Ga04G0362 | PB1       | Chr04 | 4,287,007   | 4,288,497   | +      | 1,491       | 1,491                  | 1,491           | 52                 | 1           | 1,491.00              | No intron               | 496                 | 53.937                 | -3.5   | 5.979 | -0.584 | plas                     |
| Ga04G1727 | NLP5      | Chr04 | 92,357,331  | 92,359,836  | -      | 2,506       | 819                    | 819             | 45.7               | 4           | 204.8                 | 562.3                   | 272                 | 30.064                 | 4.5    | 7.7   | -0.793 | E.R.                     |
| Ga05G0062 | PB1       | Chr05 | 648,941     | 655,189     | +      | 6,249       | 3,309                  | 3,309           | 42                 | 8           | 413.6                 | 420                     | 1,102               | 122.242                | -21.5  | 5.733 | -0.459 | E.R.                     |
| Ga05G0123 | PB1       | Chr05 | 1,221,676   | 1,227,148   | -      | 5,473       | 4,206                  | 4,206           | 44.2               | 9           | 467.3                 | 158.4                   | 1,401               | 151.391                | -26    | 5.162 | -0.425 | nucl                     |
| Ga05G0157 | PB1       | Chr05 | 1,470,064   | 1,471,098   | +      | 1,035       | 762                    | 762             | 46.5               | 4           | 190.5                 | 91                      | 253                 | 28.165                 | 5.5    | 8.262 | -0.609 | E.R.                     |
| Ga05G0605 | PB1       | Chr05 | 5,422,760   | 5,424,998   | -      | 2,239       | 2,145                  | 2,145           | 42.9               | 2           | 1,072.50              | 94                      | 714                 | 81.138                 | -16.5  | 5.035 | -0.505 | nucl                     |
| Ga05G1166 | PB1       | Chr05 | 10,236,830  | 10,239,277  | +      | 2,448       | 2,238                  | 2,238           | 40.5               | 2           | 1,119.00              | 210                     | 745                 | 83.99                  | 17.5   | 7.858 | -0.27  | nucl                     |
| Ga05G1781 | PB1       | Chr05 | 16,240,987  | 16,242,334  | +      | 1,348       | 1,257                  | 1,257           | 51.1               | 2           | 628.5                 | 91                      | 418                 | 45.807                 | -7     | 5.656 | -0.525 | E.R.                     |
| Ga05G1907 | NLP4      | Chr05 | 17,145,404  | 17,149,022  | -      | 3,619       | 2,829                  | 2,829           | 42.5               | 5           | 565.8                 | 197.5                   | 942                 | 104.829                | 6.5    | 6.86  | -0.479 | nucl                     |
| Ga05G2305 | PB1       | Chr05 | 21,452,220  | 21,453,608  | +      | 1,389       | 1,389                  | 1,389           | 47.7               | 1           | 1,389.00              | No intron               | 462                 | 50.362                 | -14    | 4.536 | -0.326 | E.R.                     |
| Ga05G2814 | PB1       | Chr05 | 28,929,525  | 28,930,901  | +      | 1,377       | 1,377                  | 1,377           | 50.6               | 1           | 1,377.00              | No intron               | 458                 | 49.347                 | -10    | 4.756 | -0.418 | nucl                     |
| Ga05G3626 | PB1       | Chr05 | 76,830,437  | 76,832,828  | +      | 2,392       | 2,136                  | 2,136           | 49.9               | 2           | 1,068.00              | 256                     | 711                 | 77.069                 | -5     | 6.147 | -0.634 | plas                     |
| Ga06G0496 | PB1       | Chr06 | 6,832,290   | 6,837,221   | -      | 4,932       | 4,053                  | 4,053           | 44                 | 10          | 405.3                 | 97.7                    | 1,350               | 146.715                | -40    | 4.923 | -0.433 | E.R.                     |
| Ga06G1549 | PB1       | Chr06 | 95,228,976  | 95,232,529  | +      | 3,554       | 1,542                  | 1,542           | 49.9               | 3           | 514                   | 1,006.00                | 513                 | 56.107                 | 4      | 6.912 | -0.365 | nucl                     |
| Ga06G2383 | PB1       | Chr06 | 129,806,481 | 129,807,842 | -      | 1,362       | 1,272                  | 1,272           | 49.3               | 2           | 636                   | 90                      | 423                 | 46.728                 | -2.5   | 6.231 | -0.642 | E.R.                     |

|           |        |             |             |             |   |       |       |       |      |    |          |       |       |         |       |       |        |      |
|-----------|--------|-------------|-------------|-------------|---|-------|-------|-------|------|----|----------|-------|-------|---------|-------|-------|--------|------|
| Ga08G2905 | PB1    | Chr08       | 128,836,714 | 128,838,577 | + | 1,864 | 1,215 | 1,215 | 39.6 | 7  | 173.6    | 108.2 | 404   | 45.8    | -19   | 4.542 | -0.539 | nucl |
| Ga09G0065 | PB1    | Chr09       | 1,329,521   | 1,335,722   | + | 6,202 | 1,593 | 1,593 | 44.3 | 14 | 113.8    | 354.5 | 530   | 57.203  | 9.5   | 8.251 | -0.137 | nucl |
| Ga09G2119 | PB1    | Chr09       | 79,013,481  | 79,017,423  | - | 3,943 | 2,916 | 2,916 | 45.3 | 5  | 583.2    | 256.8 | 971   | 106.588 | -15   | 5.218 | -0.358 | plas |
| Ga09G2756 | PB1    | Chr09       | 84,439,491  | 84,441,835  | - | 2,345 | 2,256 | 2,256 | 42.7 | 2  | 1,128.00 | 89    | 751   | 84.642  | 5.5   | 7.003 | -0.391 | nucl |
| Ga09G2758 | RWP-RK | Chr09       | 84,450,923  | 84,451,999  | + | 1,077 | 849   | 849   | 37.7 | 4  | 212.3    | 76    | 282   | 32.665  | -4    | 5.203 | -0.885 | nucl |
| Ga10G1690 | NLP8   | Chr10       | 92,139,114  | 92,144,520  | + | 5,407 | 2,856 | 2,856 | 42.7 | 5  | 571.2    | 637.8 | 951   | 104.301 | -20   | 4.973 | -0.391 | E.R. |
| Ga11G0754 | FRS3   | Chr11       | 12,939,357  | 12,941,820  | + | 2,464 | 2,331 | 2,331 | 44   | 2  | 1,165.50 | 133   | 776   | 87.706  | 9.5   | 7.374 | -0.336 | plas |
| Ga11G2252 | PB1    | Chr11       | 101,117,146 | 101,118,915 | + | 1,770 | 1,431 | 1,431 | 47.1 | 2  | 715.5    | 339   | 476   | 52.15   | 1     | 6.601 | -0.433 | plas |
| Ga11G3460 | PB1    | Chr11       | 118,880,180 | 118,886,601 | - | 6,422 | 1,593 | 1,593 | 45.6 | 14 | 113.8    | 371.5 | 530   | 57.654  | 9     | 8.286 | -0.116 | nucl |
| Ga11G3656 | PB1    | Chr11       | 120,564,424 | 120,567,735 | + | 3,312 | 2,352 | 2,352 | 44.2 | 7  | 336      | 160   | 783   | 84.76   | -32.5 | 4.429 | -0.248 | nucl |
| Ga11G3698 | PB1    | Chr11       | 120,909,781 | 120,914,314 | + | 4,534 | 1,614 | 1,614 | 43   | 14 | 115.3    | 224.6 | 537   | 58.521  | 8.5   | 8.358 | -0.146 | nucl |
| Ga12G1060 | RWP-RK | Chr12       | 11,596,165  | 11,597,413  | - | 1,249 | 894   | 894   | 43.1 | 4  | 223.5    | 118.3 | 297   | 34.316  | -1    | 6.001 | -0.715 | E.R. |
| Ga12G1409 | PB1    | Chr12       | 19,838,829  | 19,839,564  | - | 736   | 648   | 648   | 45.4 | 2  | 324      | 88    | 215   | 23.822  | 15.5  | 9.57  | -0.331 | plas |
| Ga12G2628 | PB1    | Chr12       | 97,386,890  | 97,392,787  | - | 5,898 | 3,939 | 3,939 | 43.1 | 8  | 492.4    | 279.9 | 1,312 | 144.784 | -21.5 | 5.426 | -0.548 | nucl |
| Ga13G1636 | PB1    | Chr13       | 102,514,965 | 102,517,081 | + | 2,117 | 2,085 | 2,085 | 45.2 | 2  | 1,042.50 | 32    | 694   | 76.782  | -13   | 5.159 | -0.501 | plas |
| Ga13G2231 | PB1    | Chr13       | 117,360,813 | 117,363,720 | - | 2,908 | 2,286 | 2,286 | 41.8 | 3  | 762      | 311   | 761   | 86.215  | -3    | 6.246 | -0.375 | nucl |
| Ga13G2276 | PB1    | Chr13       | 118,092,601 | 118,094,896 | + | 2,296 | 2,178 | 2,178 | 44.2 | 2  | 1,089.00 | 118   | 725   | 81.973  | -12.5 | 5.169 | -0.509 | nucl |
| Ga13G2501 | PB1    | Chr13       | 120,304,240 | 120,306,382 | - | 2,143 | 2,052 | 2,052 | 41.3 | 2  | 1,026.00 | 91    | 683   | 78.793  | -4.5  | 6.059 | -0.614 | nucl |
| Ga14G1659 | NLP2   | tig00015610 | 837,745     | 841,356     | - | 3,612 | 2,850 | 2,850 | 44.2 | 4  | 712.5    | 254   | 949   | 104.265 | 3.5   | 6.779 | -0.415 | nucl |
| Ga14G2164 | NLP7   | tig00018630 | 187,263     | 191,629     | + | 4,367 | 2,961 | 2,961 | 44   | 5  | 592.2    | 351.5 | 986   | 108.719 | -14   | 5.474 | -0.341 | nucl |

C. Physiochemical properties of the proteins encoded by the NLP genes in *G. raimondii*

| Gene ID          | Gene Name | Chro  | Start    | End      | Strand | Length (bp) | Transcript Length (bp) | CDS Length (bp) | CDS GC Content (%) | Exon Number | Mean Exon Length (bp) | Mean Intron Length (bp) | Protein Length (aa) | Molecular Weight (kDa) | Charge | Isoelectric Point | GRAVY  | Subcellular localization |
|------------------|-----------|-------|----------|----------|--------|-------------|------------------------|-----------------|--------------------|-------------|-----------------------|-------------------------|---------------------|------------------------|--------|-------------------|--------|--------------------------|
| Gorai.001G058100 | CBSCBSPB5 | Chr01 | 5738607  | 5746851  | +      | 8245        | 2378                   | 1644            | 43.4               | 15          | 158.5                 | 417.3                   | 547                 | 59.918                 | 3      | 7.046             | -0.227 | nucl                     |
| Gorai.001G068000 | NA        | Chr01 | 6818609  | 6821267  | -      | 2659        | 2181                   | 1986            | 44.7               | 2           | 1090.5                | 478                     | 661                 | 72.443                 | -12.5  | 5.092             | -0.592 | plas                     |
| Gorai.001G185100 | EDR1      | Chr01 | 29557800 | 29565550 | +      | 7751        | 4257                   | 3963            | 41.6               | 11          | 387                   | 325.3                   | 1320                | 145.54                 | -15    | 5.771             | -0.493 | plas                     |
| Gorai.002G103800 | Ttc1      | Chr02 | 13237618 | 13240656 | -      | 3039        | 2832                   | 2025            | 46                 | 2           | 1416                  | 207                     | 674                 | 74.428                 | -23    | 4.75              | -0.533 | nucl                     |
| Gorai.002G110000 | EDR1      | Chr02 | 15142629 | 15153444 | +      | 10816       | 4510                   | 3753            | 41.5               | 8           | 563.8                 | 900.1                   | 1250                | 139.608                | -19.5  | 5.553             | -0.578 | E.R.                     |
| Gorai.002G115800 | NLP4      | Chr02 | 16450295 | 16455270 | -      | 4976        | 3860                   | 2778            | 42.7               | 5           | 772                   | 279                     | 925                 | 102.796                | 6      | 6.798             | -0.468 | nucl                     |
| Gorai.002G206700 | NLP2      | Chr02 | 55259990 | 55264633 | +      | 4644        | 3473                   | 2799            | 44.9               | 5           | 694.6                 | 292.8                   | 932                 | 102.896                | -11.5  | 5.763             | -0.433 | nucl                     |
| Gorai.002G218300 | NA        | Chr02 | 56990540 | 56993556 | -      | 3017        | 1734                   | 1032            | 47.8               | 4           | 433.5                 | 314                     | 343                 | 37.787                 | 11.5   | 8.296             | -0.695 | plas                     |
| Gorai.003G002500 | RKD5      | Chr03 | 148877   | 152037   | +      | 3161        | 1474                   | 966             | 44.3               | 5           | 294.8                 | 421.8                   | 321                 | 36.948                 | 12     | 9.401             | -0.571 | nucl                     |
| Gorai.003G063900 | GIS2      | Chr03 | 12233508 | 12236431 | +      | 2924        | 1137                   | 795             | 48.1               | 5           | 227.4                 | 446.8                   | 264                 | 29.205                 | 18     | 8.225             | -0.509 | nucl                     |
| Gorai.003G074300 | NLP7      | Chr03 | 17754935 | 17759130 | +      | 4196        | 3218                   | 2961            | 43.8               | 5           | 643.6                 | 220.3                   | 986                 | 108.771                | -4.5   | 6.293             | -0.397 | E.R.                     |
| Gorai.003G115800 | NBR1      | Chr03 | 35238461 | 35242691 | +      | 4231        | 3113                   | 2397            | 44                 | 7           | 444.7                 | 186.3                   | 798                 | 86.386                 | -20    | 4.75              | -0.317 | E.R.                     |
| Gorai.003G120400 | CBSCBSPB5 | Chr03 | 36148775 | 36154621 | +      | 5847        | 2351                   | 1659            | 43.8               | 15          | 156.7                 | 243                     | 552                 | 60.254                 | 4.5    | 7.328             | -0.239 | nucl                     |
| Gorai.003G121600 | RKD4      | Chr03 | 36396958 | 36398115 | -      | 1158        | 789                    | 723             | 40.4               | 3           | 263                   | 184.5                   | 240                 | 27.837                 | -1     | 6.314             | -0.569 | nucl                     |
| Gorai.004G101000 | STY8      | Chr04 | 18347512 | 18355724 | +      | 8213        | 4566                   | 3414            | 42.8               | 9           | 507.3                 | 455.9                   | 1137                | 126.211                | -20    | 5.792             | -0.577 | E.R.                     |
| Gorai.004G108400 | NA        | Chr04 | 22283295 | 22287561 | +      | 4267        | 3065                   | 2535            | 43.2               | 3           | 1021.7                | 601                     | 844                 | 94.459                 | 27     | 8.726             | -0.401 | cyto                     |
| Gorai.004G109400 | unc45b    | Chr04 | 22788713 | 22792660 | -      | 3948        | 3649                   | 2286            | 40.6               | 3           | 1216.3                | 149.5                   | 761                 | 87.433                 | -7.5   | 5.904             | -0.644 | nucl                     |
| Gorai.004G131700 | NLP7      | Chr04 | 35735761 | 35741248 | -      | 5488        | 3361                   | 2961            | 44.2               | 5           | 672.2                 | 531.8                   | 986                 | 108.563                | -10.5  | 5.775             | -0.338 | plas                     |
| Gorai.004G198100 | RKD3      | Chr04 | 51913763 | 51915383 | +      | 1621        | 1144                   | 1071            | 42.9               | 6           | 190.7                 | 95.4                    | 356                 | 40.479                 | -4     | 5.82              | -0.665 | E.R.                     |
| Gorai.004G225000 | EDR1      | Chr04 | 55961518 | 55968882 | +      | 7365        | 4700                   | 3834            | 41.5               | 10          | 470                   | 296.1                   | 1277                | 140.517                | -38    | 4.732             | -0.445 | plas                     |
| Gorai.005G013500 | NLP8      | Chr05 | 982668   | 987909   | -      | 5242        | 3916                   | 2082            | 42.4               | 8           | 489.5                 | 189.4                   | 693                 | 76.919                 | -1     | 6.4               | -0.457 | nucl                     |
| Gorai.005G035500 | EDR1      | Chr05 | 3370861  | 3375903  | -      | 5043        | 3291                   | 3291            | 41.4               | 9           | 365.7                 | 219                     | 1096                | 122.061                | 16.5   | 7.161             | -0.624 | plas                     |
| Gorai.005G072800 | NA        | Chr05 | 7999164  | 8002301  | -      | 3138        | 2772                   | 2226            | 43.2               | 3           | 924                   | 183                     | 741                 | 83.515                 | 15.5   | 7.874             | -0.335 | E.R.                     |
| Gorai.005G126000 | NLP8      | Chr05 | 28134228 | 28141832 | -      | 7605        | 4153                   | 2982            | 44                 | 7           | 593.3                 | 575.3                   | 993                 | 109.107                | -14    | 5.485             | -0.431 | E.R.                     |
| Gorai.005G133400 | PIPC      | Chr05 | 33490552 | 33493311 | -      | 2760        | 759                    | 564             | 42.6               | 6           | 126.5                 | 400.2                   | 187                 | 20.937                 | 1      | 6.93              | 0.195  | nucl                     |
| Gorai.005G178300 | NA        | Chr05 | 52259034 | 52262007 | -      | 2974        | 2129                   | 561             | 50.1               | 4           | 532.3                 | 273.3                   | 186                 | 20.49                  | 8.5    | 9.228             | -0.368 | nucl                     |
| Gorai.005G227800 | NA        | Chr05 | 61083672 | 61085543 | -      | 1872        | 1851                   | 1440            | 52.5               | 2           | 925.5                 | 21                      | 479                 | 52.282                 | -1.5   | 6.326             | -0.619 | plas                     |
| Gorai.005G259100 | NLP2      | Chr05 | 63487945 | 63491581 | +      | 3637        | 2824                   | 2349            | 44.7               | 4           | 706                   | 271                     | 782                 | 87.283                 | 11     | 7.508             | -0.381 | nucl                     |
| Gorai.006G007000 | CBSCBSPB3 | Chr06 | 1417393  | 1424324  | +      | 6932        | 2308                   | 1593            | 44.4               | 14          | 164.9                 | 354.8                   | 530                 | 57.17                  | 7      | 7.481             | -0.132 | nucl                     |
| Gorai.006G206500 | NLP7      | Chr06 | 46211226 | 46215591 | -      | 4366        | 3345                   | 2913            | 45.2               | 5           | 669                   | 255.3                   | 970                 | 106.376                | -21    | 4.908             | -0.352 | plas                     |
| Gorai.006G266700 | FRS6      | Chr06 | 50522060 | 50527039 | -      | 4980        | 2904                   | 2253            | 42.7               | 4           | 726                   | 692                     | 750                 | 84.511                 | 6.5    | 7.111             | -0.372 | nucl                     |
| Gorai.006G266900 | RKD1      | Chr06 | 50535326 | 50536377 | +      | 1052        | 798                    | 798             | 36.5               | 5           | 159.6                 | 63.5                    | 266                 | 31.326                 | -5     | 4.968             | -0.851 | nucl                     |
| Gorai.007G043100 | CBSCBSPB5 | Chr07 | 2984522  | 2990000  | -      | 5479        | 2470                   | 1614            | 43.2               | 15          | 164.7                 | 214.9                   | 537                 | 58.496                 | 8.5    | 8.358             | -0.15  | nucl                     |
| Gorai.007G046900 | NBR1      | Chr07 | 3261901  | 3265802  | -      | 3902        | 2923                   | 2352            | 44.5               | 7           | 417.6                 | 163.2                   | 783                 | 84.461                 | -35    | 4.385             | -0.243 | nucl                     |
| Gorai.007G067100 | CBSCBSPB3 | Chr07 | 4737488  | 4744662  | +      | 7175        | 2036                   | 1593            | 45.5               | 15          | 135.7                 | 367.1                   | 530                 | 57.617                 | 7      | 7.902             | -0.102 | nucl                     |
| Gorai.007G184900 | NA        | Chr07 | 17737913 | 17740296 | -      | 2384        | 2045                   | 1437            | 47.9               | 2           | 1022.5                | 339                     | 478                 | 52.193                 | 0      | 6.507             | -0.473 | plas                     |
| Gorai.007G309200 | NA        | Chr07 | 52275678 | 52279944 | -      | 4267        | 3094                   | 2310            | 43.6               | 5           | 618.8                 | 293.3                   | 769                 | 86.953                 | 11.5   | 7.645             | -0.332 | plas                     |
| Gorai.008G041100 | NLP2      | Chr08 | 5356850  | 5361647  | +      | 4798        | 3753                   | 2850            | 44.3               | 5           | 750.6                 | 261.3                   | 949                 | 104.46                 | 2.5    | 6.701             | -0.441 | nucl                     |
| Gorai.008G049200 | EDR1      | Chr08 | 6849418  | 6857973  | -      | 8556        | 4442                   | 3948            | 43.1               | 11          | 403.8                 | 397.7                   | 1315                | 145.076                | -24.5  | 5.291             | -0.547 | nucl                     |
| Gorai.008G160900 | NA        | Chr08 | 42698996 | 42700408 | +      | 1413        | 1325                   | 612             | 45.6               | 2           | 662.5                 | 88                      | 203                 | 22.313                 | 13.5   | 9.575             | -0.347 | extr                     |
| Gorai.008G193400 | RKD1      | Chr08 | 47736225 | 47737496 | +      | 1272        | 903                    | 903             | 43.5               | 4           | 225.8                 | 123                     | 300                 | 34.56                  | 0      | 6.54              | -0.68  | E.R.                     |
| Gorai.009G006600 | STY8      | Chr09 | 559527   | 567335   | +      | 7809        | 4362                   | 3324            | 42                 | 10          | 436.2                 | 369.2                   | 1107                | 122.843                | -24    | 5.636             | -0.476 | nucl                     |
| Gorai.009G012400 | CTR1      | Chr09 | 1023422  | 1029976  | -      | 6555        | 5275                   | 4212            | 44.2               | 9           | 586.1                 | 160                     | 1403                | 151.514                | -25.5  | 5.201             | -0.417 | nucl                     |
| Gorai.009G059900 | unc45b    | Chr09 | 4290989  | 4294322  | -      | 3334        | 2930                   | 2145            | 43.1               | 3           | 976.7                 | 202                     | 714                 | 81.028                 | -18.5  | 4.95              | -0.486 | nucl                     |
| Gorai.009G114800 | NA        | Chr09 | 8413698  | 8418522  | +      | 4825        | 3011                   | 2238            | 40.3               | 4           | 752.8                 | 604.7                   | 745                 | 83.96                  | 14     | 7.642             | -0.276 | nucl                     |
| Gorai.009G174700 | NA        | Chr09 | 13491337 | 13494600 | +      | 3264        | 1982                   | 1257            | 51.2               | 3           | 660.7                 | 641                     | 418                 | 45.998                 | -7     | 5.658             | -0.575 | E.R.                     |
| Gorai.009G187500 | NLP4      | Chr09 | 14396710 | 14402027 | -      | 5318        | 3361                   | 2823            | 42.5               | 6           | 560.2                 | 218.2                   | 940                 | 104.659                | 3      | 6.641             | -0.488 | nucl                     |
| Gorai.009G226800 | NA        | Chr09 | 17768850 | 17771608 | +      | 2759        | 1674                   | 1389            | 47.9               | 1           | 1674                  | No intron               | 462                 | 50.367                 | -13    | 4.589             | -0.352 | E.R.                     |
| Gorai.009G278600 | NA        | Chr09 | 23452279 | 23454562 | +      | 2284        | 2054                   | 1368            | 50.9               | 2           | 1027                  | 148                     | 455                 | 49.04                  | -10    | 4.756             | -0.409 | nucl                     |
| Gorai.009G348900 | NA        | Chr09 | 43769676 | 43773566 | -      | 3891        | 3031                   | 2124            | 50                 | 4           | 757.8                 | 286.7                   | 707                 | 76.379                 | -5     | 6.147             | -0.602 | plas                     |
| Gorai.010G056300 | CTR1      | Chr10 | 6416782  | 6422116  | -      | 5335        | 4495                   | 4083            | 44.1               | 9           | 499.4                 | 105                     | 1360                | 147.724                | -35.5  | 5.05              | -0.419 | E.R.                     |
| Gorai.010G148800 | NA        | Chr10 | 39711200 | 39716461 | -      | 5262        | 1794                   | 1428            | 50.8               | 4           | 448.5                 | 1156                    | 475                 | 51.742                 | 4      | 6.967             | -0.508 | nucl                     |
| Gorai.010G253900 | NA        | Chr10 | 61947447 | 61948997 | -      | 1551        | 1462                   | 1272            | 49.1               | 2           | 731                   | 89                      | 423                 | 46.638                 | -2     | 6.301             | -0.646 | nucl                     |
| Gorai.011G138700 | NLP8      | Chr11 | 21422864 | 21429703 | -      | 6840        | 3733                   | 2856            | 42.6               | 6           | 622.2                 | 621.4                   | 951                 | 104.149                | -21    | 4.943             | -0.396 | E.R.                     |

|                  |        |       |          |          |   |       |      |      |      |   |        |           |     |        |       |       |        |      |
|------------------|--------|-------|----------|----------|---|-------|------|------|------|---|--------|-----------|-----|--------|-------|-------|--------|------|
| Gorai.012G016100 | NA     | Chr12 | 1837773  | 1840576  | - | 2804  | 994  | 360  | 44.2 | 6 | 165.7  | 362       | 119 | 13.212 | -5.5  | 4.353 | 0.233  | nucl |
| Gorai.012G040100 | NLP5   | Chr12 | 4989645  | 5000646  | + | 11002 | 976  | 819  | 45.8 | 5 | 195.2  | 2503.5    | 272 | 30.086 | 3.5   | 7.305 | -0.771 | E.R. |
| Gorai.012G145600 | NA     | Chr12 | 31980879 | 31983070 | - | 2192  | 2192 | 1485 | 52   | 1 | 2192   | No intron | 494 | 53.903 | -3.5  | 5.979 | -0.613 | plas |
| Gorai.013G149700 | Ttc1   | Chr13 | 40965375 | 40968365 | + | 2991  | 2681 | 2118 | 45.1 | 2 | 1340.5 | 310       | 705 | 78.513 | -12   | 5.296 | -0.535 | E.R. |
| Gorai.013G209900 | NA     | Chr13 | 52160839 | 52164967 | - | 4129  | 2940 | 2286 | 42   | 4 | 735    | 396.3     | 761 | 86.151 | 0.5   | 6.548 | -0.373 | nucl |
| Gorai.013G214100 | unc45b | Chr13 | 53493233 | 53496357 | + | 3125  | 2768 | 2178 | 44.6 | 3 | 922.7  | 178.5     | 725 | 81.901 | -10.5 | 5.278 | -0.519 | nucl |
| Gorai.013G236600 | Ttc1   | Chr13 | 55452501 | 55455873 | - | 3373  | 3197 | 2052 | 41.7 | 3 | 1065.7 | 88        | 683 | 78.677 | -3.5  | 6.201 | -0.582 | nucl |
