# Supplementary material for: Map-Based Functional Analysis of the GhNLP Genes Reveals Their Roles in Enhancing Tolerance to N-Deficiency in Cotton
Source: MDPI journal article supplement (doi:10.3390/ijms20194953), 2019-10-08
Supplement: s1 [file s1]

Supplementary Table 3: Cis promoter analysis of the *G. hirsutum* *NLP* genes

| Gene ID         | Factor or Site Name | Loc. | (Str.) | Signal Sequence | Function                                                                                                            |
|-----------------|---------------------|------|--------|-----------------|---------------------------------------------------------------------------------------------------------------------|
| Gh_A09G0059     | LTRE1HVBLT49        | 377  | (-)    | CCGAAA          | "LTRE-1" (low-temperature-responsive element)                                                                       |
| Gh_A11G0542     | CBFHV               | 103  | (+)    | RYCGAC          | dehydration-responsive element (DRE) binding proteins                                                               |
| Gh_D09G0055     | LTRE1HVBLT49        | 377  | (-)    | CCGAAA          | "LTRE-1" (low-temperature-responsive element)                                                                       |
| Gh_D11G0626     | CBFHV               | 103  | (+)    | RYCGAC          | dehydration-responsive element (DRE) binding proteins                                                               |
| Gh_A03G0454     | LTRE1HVBLT49        | 100  | (+)    | CCGAAA          | "LTRE-1" (low-temperature-responsive element)                                                                       |
| Gh_A07G0445     | ASF1MOTIFCAMV       | 1319 | (+)    | TGACG           | A xenobiotic-stress-activated transcription factor/ Abiotic and biotic stress differentially stimulate as-1 element |
| Gh_A11G3016     | CBFHV               | 1496 | (+)    | RYCGAC          | dehydration-responsive element (DRE) binding proteins                                                               |
| Gh_D03G1084     | LTRE1HVBLT49        | 100  | (+)    | CCGAAA          | "LTRE-1" (low-temperature-responsive element)                                                                       |
| Gh_D07G0509     | ASF1MOTIFCAMV       | 1319 | (+)    | TGACG           | A xenobiotic-stress-activated transcription factor/ Abiotic and biotic stress differentially stimulate as-1 element |
| Gh_D11G0397     | CBFHV               | 1496 | (+)    | RYCGAC          | dehydration-responsive element (DRE) binding proteins                                                               |
| Gh_A01G0794     | CBFHV               | 3726 | (-)    | RYCGAC          | dehydration-responsive element (DRE) binding proteins                                                               |
| Gh_A05G0047     | CBFHV               | 1406 | (-)    | RYCGAC          | dehydration-responsive element (DRE) binding proteins                                                               |
| Gh_A06G0421     | LTRE1HVBLT49        | 3256 | (-)    | CCGAAA          | "LTRE-1" (low-temperature-responsive element)                                                                       |
| Gh_D05G0100     | CBFHV               | 1406 | (-)    | RYCGAC          | dehydration-responsive element (DRE) binding proteins                                                               |
| Gh_D06G0459     | LTRE1HVBLT49        | 3253 | (-)    | CCGAAA          | "LTRE-1" (low-temperature-responsive element)                                                                       |
| Gh_A02G0239     | LTRE1HVBLT49        | 3058 | (-)    | CCGAAA          | "LTRE-1" (low-temperature-responsive element)                                                                       |
| Gh_A07G1460     | MYCCONSUSAT         | 47   | (-)    | CANNTG          | abiotic stress signalling in plants                                                                                 |
| Gh_A08G1723     | ACGTABREMOTIFA2OSEM | 643  | (-)    | ACGTGKC         | ABA-responsive expression                                                                                           |
| Gh_A12G0439     | CBFHV               | 3706 | (-)    | RYCGAC          | dehydration-responsive element (DRE) binding proteins                                                               |
| Gh_D02G0308     | LTRE1HVBLT49        | 3058 | (-)    | CCGAAA          | "LTRE-1" (low-temperature-responsive element)                                                                       |
| Gh_D05G0049     | ASF1MOTIFCAMV       | 330  | (-)    | TGACG           | A xenobiotic-stress-activated transcription factor/ Abiotic and biotic stress differentially stimulate as-1 element |
| Gh_D07G1556     | ASF1MOTIFCAMV       | 22   | (-)    | TGACG           | A xenobiotic-stress-activated transcription factor/ Abiotic and biotic stress differentially stimulate as-1 element |
| Gh_D08G2074     | ACGTABREMOTIFA2OSEM | 649  | (-)    | ACGTGKC         | ABA-responsive expression                                                                                           |
| Gh_D12G0440     | CBFHV               | 3706 | (-)    | RYCGAC          | dehydration-responsive element (DRE) binding proteins                                                               |
| Gh_A05G0079     | MYCCONSUSAT         | 10   | (-)    | CANNTG          | abiotic stress signalling in plants                                                                                 |
| Gh_D05G0138     | MYCCONSUSAT         | 10   | (-)    | CANNTG          | abiotic stress signalling in plants                                                                                 |
| Gh_A01G1560     | ASF1MOTIFCAMV       | 2    | (+)    | TGACG           | A xenobiotic-stress-activated transcription factor/ Abiotic and biotic stress differentially stimulate as-1 element |
| Gh_A03G1178     | CBFHV               | 116  | (-)    | RYCGAC          | dehydration-responsive element (DRE) binding proteins                                                               |
| Gh_A03G1567     | CBFHV               | 65   | (+)    | RYCGAC          | dehydration-responsive element (DRE) binding proteins                                                               |
| Gh_A04G0995     | ACGTABREMOTIFA2OSEM | 1359 | (-)    | ACGTGKC         | ABA-responsive expression                                                                                           |
| Gh_A05G2263     | CBFHV               | 65   | (+)    | RYCGAC          | dehydration-responsive element (DRE) binding proteins                                                               |
| Gh_A05G3757     | CBFHV               | 1149 | (-)    | RYCGAC          | dehydration-responsive element (DRE) binding proteins                                                               |
| Gh_A06G1787     | ACGTABREMOTIFA2OSEM | 576  | (-)    | ACGTGKC         | ABA-responsive expression                                                                                           |
| Gh_A06G2074     | ACGTABREMOTIFA2OSEM | 4    | (-)    | ACGTGKC         | ABA-responsive expression                                                                                           |
| Gh_A07G0531     | CBFHV               | 1028 | (-)    | RYCGAC          | dehydration-responsive element (DRE) binding proteins                                                               |
| Gh_A11G1536     | CBFHV               | 135  | (+)    | RYCGAC          | dehydration-responsive element (DRE) binding proteins                                                               |
| Gh_A12G1336     | ASF1MOTIFCAMV       | 419  | (-)    | TGACG           | A xenobiotic-stress-activated transcription factor/ Abiotic and biotic stress differentially stimulate as-1 element |
| Gh_D01G1812     | LTRE1HVBLT49        | 941  | (+)    | CCGAAA          | "LTRE-1" (low-temperature-responsive element)                                                                       |
| Gh_D02G1209     | MYCCONSUSAT         | 161  | (-)    | CANNTG          | abiotic stress signalling in plants                                                                                 |
| Gh_D02G1615     | CBFHV               | 116  | (-)    | RYCGAC          | dehydration-responsive element (DRE) binding proteins                                                               |
| Gh_D02G2018     | CBFHV               | 65   | (+)    | RYCGAC          | dehydration-responsive element (DRE) binding proteins                                                               |
| Gh_D04G1546     | ACGTABREMOTIFA2OSEM | 1353 | (-)    | ACGTGKC         | ABA-responsive expression                                                                                           |
| Gh_D05G1588     | ACGTABREMOTIFA2OSEM | 536  | (+)    | ACGTGKC         | ABA-responsive expression                                                                                           |
| Gh_D05G2083     | CBFHV               | 1149 | (-)    | RYCGAC          | dehydration-responsive element (DRE) binding proteins                                                               |
| Gh_D05G2522     | CBFHV               | 65   | (+)    | RYCGAC          | dehydration-responsive element (DRE) binding proteins                                                               |
| Gh_D05G3139     | CBFHV               | 248  | (-)    | RYCGAC          | dehydration-responsive element (DRE) binding proteins                                                               |
| Gh_D06G1329     | ABRECE1HVA22        | 920  | (+)    | TGCCACCGG       | "ABRE (ABA responsive element)/dehydration-responsive                                                               |
| Gh_D06G2192     | CBFHV               | 725  | (+)    | RYCGAC          | dehydration-responsive element (DRE) binding proteins                                                               |
| Gh_D07G0600     | CBFHV               | 1031 | (-)    | RYCGAC          | dehydration-responsive element (DRE) binding proteins                                                               |
| Gh_D11G1701     | CBFHV               | 135  | (+)    | RYCGAC          | dehydration-responsive element (DRE) binding proteins                                                               |
| Gh_Sca004734G01 | ACGTABREMOTIFA2OSEM | 536  | (+)    | ACGTGKC         | ABA-responsive expression                                                                                           |
| Gh_Sca101252G01 | MYCCONSUSAT         | 44   | (-)    | CANNTG          | abiotic stress signalling in plants                                                                                 |

|                 |                     |      |     |         |                                                                                                                     |
|-----------------|---------------------|------|-----|---------|---------------------------------------------------------------------------------------------------------------------|
| Gh_Sca135291G01 | CBFHV               | 40   | (+) | RYCGAC  | dehydration-responsive element (DRE) binding proteins                                                               |
| Gh_A03G0493     | CBFHV               | 1040 | (+) | RYCGAC  | dehydration-responsive element (DRE) binding proteins                                                               |
| Gh_A11G0376     | ACGTABREMOTIFA2OSEM | 399  | (+) | ACGTGKC | ABA-responsive expression                                                                                           |
| Gh_D03G1042     | CBFHV               | 1040 | (+) | RYCGAC  | dehydration-responsive element (DRE) binding proteins                                                               |
| Gh_D11G0436     | ACGTABREMOTIFA2OSEM | 408  | (+) | ACGTGKC | ABA-responsive expression                                                                                           |
| Gh_A01G1468     | LTRE1HVBTL49        | 230  | (+) | CCGAAA  | "LTRE-1" (low-temperature-responsive element)                                                                       |
| Gh_A03G1857     | CBFHV               | 2203 | (-) | RYCGAC  | dehydration-responsive element (DRE) binding proteins                                                               |
| Gh_A12G0297     | CBFHV               | 278  | (+) | RYCGAC  | dehydration-responsive element (DRE) binding proteins                                                               |
| Gh_D01G1705     | ACGTABREMOTIFA2OSEM | 1271 | (+) | ACGTGKC | ABA-responsive expression                                                                                           |
| Gh_D02G2296     | CBFHV               | 136  | (-) | RYCGAC  | dehydration-responsive element (DRE) binding proteins                                                               |
| Gh_D05G2521     | CBFHV               | 147  | (+) | RYCGAC  | dehydration-responsive element (DRE) binding proteins                                                               |
| Gh_D12G0368     | CBFHV               | 1084 | (+) | RYCGAC  | dehydration-responsive element (DRE) binding proteins                                                               |
| Gh_A01G0844     | CBFHV               | 1977 | (+) | RYCGAC  | dehydration-responsive element (DRE) binding proteins                                                               |
| Gh_A05G1538     | CBFHV               | 287  | (-) | RYCGAC  | dehydration-responsive element (DRE) binding proteins                                                               |
| Gh_D01G0872     | CBFHV               | 1977 | (+) | RYCGAC  | dehydration-responsive element (DRE) binding proteins                                                               |
| Gh_D05G1709     | ASF1MOTIFCAMV       | 2016 | (-) | TGACG   | A xenobiotic-stress-activated transcription factor/ Abiotic and biotic stress differentially stimulate as-1 element |
| Gh_A05G3286     | CBFHV               | 71   | (+) | RYCGAC  | dehydration-responsive element (DRE) binding proteins                                                               |
| Gh_D04G0318     | CBFHV               | 71   | (+) | RYCGAC  | dehydration-responsive element (DRE) binding proteins                                                               |
| Gh_A02G0949     | LTRE1HVBTL49        | 2755 | (-) | CCGAAA  | "LTRE-1" (low-temperature-responsive element)                                                                       |
| Gh_A09G1689     | CBFHV               | 417  | (+) | RYCGAC  | dehydration-responsive element (DRE) binding proteins                                                               |
| Gh_D03G0813     | CBFHV               | 254  | (-) | RYCGAC  | dehydration-responsive element (DRE) binding proteins                                                               |
| Gh_D08G1195     | CBFHV               | 471  | (-) | RYCGAC  | dehydration-responsive element (DRE) binding proteins                                                               |
| Gh_D09G1795     | CBFHV               | 417  | (+) | RYCGAC  | dehydration-responsive element (DRE) binding proteins                                                               |
| Gh_A02G0102     | CBFHV               | 80   | (-) | RYCGAC  | dehydration-responsive element (DRE) binding proteins                                                               |
| Gh_A02G0925     | ACGTABREMOTIFA2OSEM | 260  | (-) | ACGTGKC | ABA-responsive expression                                                                                           |
| Gh_A10G1257     | LTRE1HVBTL49        | 1539 | (-) | CCGAAA  | "LTRE-1" (low-temperature-responsive element)                                                                       |
| Gh_D02G0126     | CBFHV               | 7    | (-) | RYCGAC  | dehydration-responsive element (DRE) binding proteins                                                               |
| Gh_D02G1107     | ACGTABREMOTIFA2OSEM | 260  | (-) | ACGTGKC | ABA-responsive expression                                                                                           |
| Gh_D10G1228     | ACGTABREMOTIFA2OSEM | 1158 | (-) | ACGTGKC | ABA-responsive expression                                                                                           |
| Gh_A09G2142     | ASF1MOTIFCAMV       | 718  | (-) | TGACG   | A xenobiotic-stress-activated transcription factor/ Abiotic and biotic stress differentially stimulate as-1 element |
| Gh_D12G1752     | CBFHV               | 783  | (-) | RYCGAC  | dehydration-responsive element (DRE) binding proteins                                                               |
| Gh_A12G1611     | MYCCONSENSUSAT      | 270  | (-) | CANNTG  | abiotic stress signalling in plants                                                                                 |
| Gh_D08G1828     | CBFHV               | 664  | (-) | RYCGAC  | dehydration-responsive element (DRE) binding proteins                                                               |
| Gh_A03G0443     | CBFHV               | 147  | (+) | RYCGAC  | dehydration-responsive element (DRE) binding proteins                                                               |
| Gh_D03G1095     | CBFHV               | 147  | (+) | RYCGAC  | dehydration-responsive element (DRE) binding proteins                                                               |
| Gh_A02G1702     | MYCCONSENSUSAT      | 352  | (-) | CANNTG  | abiotic stress signalling in plants                                                                                 |
| Gh_D03G0017     | MYCCONSENSUSAT      | 346  | (-) | CANNTG  | abiotic stress signalling in plants                                                                                 |
| Gh_D01G0822     | CBFHV               | 2969 | (-) | RYCGAC  | dehydration-responsive element (DRE) binding proteins                                                               |
| Gh_A05G3990     | ASF1MOTIFCAMV       | 408  | (+) | TGACG   | A xenobiotic-stress-activated transcription factor/ Abiotic and biotic stress differentially stimulate as-1 element |
| Gh_A08G0768     | LTRE1HVBTL49        | 3131 | (-) | CCGAAA  | "LTRE-1" (low-temperature-responsive element)                                                                       |
| Gh_D08G0914     | CBFHV               | 2571 | (+) | RYCGAC  | dehydration-responsive element (DRE) binding proteins                                                               |
| Gh_A01G0750     | CBFHV               | 1357 | (-) | RYCGAC  | dehydration-responsive element (DRE) binding proteins                                                               |
| Gh_A13G1093     | MYCCONSENSUSAT      | 101  | (-) | CANNTG  | abiotic stress signalling in plants                                                                                 |
| Gh_A13G2318     | LTRE1HVBTL49        | 1229 | (-) | CCGAAA  | "LTRE-1" (low-temperature-responsive element)                                                                       |
| Gh_D01G0769     | ASF1MOTIFCAMV       | 483  | (-) | TGACG   | A xenobiotic-stress-activated transcription factor/ Abiotic and biotic stress differentially stimulate as-1 element |
| Gh_D13G1358     | CBFHV               | 457  | (+) | RYCGAC  | dehydration-responsive element (DRE) binding proteins                                                               |
| Gh_D13G2470     | LTRE1HVBTL49        | 744  | (-) | CCGAAA  | "LTRE-1" (low-temperature-responsive element)                                                                       |
| Gh_A05G0460     | CBFHV               | 166  | (+) | RYCGAC  | dehydration-responsive element (DRE) binding proteins                                                               |
| Gh_A08G0810     | LTRE1HVBTL49        | 642  | (-) | CCGAAA  | "LTRE-1" (low-temperature-responsive element)                                                                       |
| Gh_A13G1599     | CBFHV               | 9    | (+) | RYCGAC  | dehydration-responsive element (DRE) binding proteins                                                               |
| Gh_D05G3923     | CBFHV               | 166  | (+) | RYCGAC  | dehydration-responsive element (DRE) binding proteins                                                               |
| Gh_D08G0987     | LTRE1HVBTL49        | 562  | (+) | CCGAAA  | "LTRE-1" (low-temperature-responsive element)                                                                       |
| Gh_D13G1958     | CBFHV               | 9    | (+) | RYCGAC  | dehydration-responsive element (DRE) binding proteins                                                               |
