# Supplementary material for: Map-Based Functional Analysis of the GhNLP Genes Reveals Their Roles in Enhancing Tolerance to N-Deficiency in Cotton
Source: MDPI journal article supplement (doi:10.3390/ijms20194953), 2019-10-08
Supplement: s1 [file s1]

Supplementary Table 5: miRNAs predicted to be targeting various upland cotton, *G. raimondii* NLP genes

| miRNA Acc.   | Target Acc.      | miRNA start | miRNA end | Target start | Target end | miRNA aligned fragment   | Target aligned fragment  | Inhibition  |
|--------------|------------------|-------------|-----------|--------------|------------|--------------------------|--------------------------|-------------|
| gra-miR166d  | Gorai.001G068000 | 1           | 21        | 1702         | 1722       | UGAUGGGAAUGUUGUUUGGCU    | UAUAGAACAGCAGUUCCAUCA    | Cleavage    |
| gra-miR166d  | Gorai.004G108400 | 1           | 21        | 407          | 427        | UGAUGGGAAUGUUGUUUGGCU    | GCCUGAAGGAUGUUACCAUCA    | Cleavage    |
| gra-miR167a  | Gorai.009G114800 | 1           | 21        | 675          | 695        | UCAGAUCAUCUUGCAGCUUCA    | UCAAGCUGCAAGGUUGUCUAC    | Cleavage    |
| gra-miR167b  | Gorai.009G114800 | 1           | 21        | 675          | 695        | UCAGAUCAUCUUGCAGCUUCA    | UCAAGCUGCAAGGUUGUCUAC    | Cleavage    |
| gra-miR167c  | Gorai.001G185100 | 1           | 22        | 2786         | 2807       | UCAGAUGAAGCUGCCAGCAUGA   | CUGGGAUGCUAGUUUCAUCUGC   | Cleavage    |
| gra-miR172a  | Gorai.013G149700 | 1           | 21        | 1962         | 1982       | GCGGCAUUAUCAAGAUUCACA    | AAAGAAUCUCGAUACUGCCGU    | Cleavage    |
| gra-miR172a  | Gorai.005G072800 | 1           | 21        | 1432         | 1451       | GCGGCAUUAUCAAGAUUCACA    | UCUGAAU-UUCAUAGUGCUGC    | Translation |
| gra-miR172a  | Gorai.009G012400 | 1           | 21        | 357          | 377        | GCGGCAUUAUCAAGAUUCACA    | UAUGGUAGUUGGUAAGCUGU     | Cleavage    |
| gra-miR172a  | Gorai.004G225000 | 1           | 21        | 2860         | 2879       | GCGGCAUUAUCAAGAUUCACA    | UCUGAGU-UUGAGGAUGCUGC    | Cleavage    |
| gra-miR172b  | Gorai.005G072800 | 1           | 21        | 1432         | 1451       | GCAGCAUUAUCAAGAUUCACA    | UCUGAAU-UUCAUAGUGCUGC    | Translation |
| gra-miR172b  | Gorai.009G012400 | 1           | 21        | 357          | 377        | GCAGCAUUAUCAAGAUUCACA    | UAUGGUAGUUGGUAAGCUGU     | Cleavage    |
| gra-miR172b  | Gorai.004G225000 | 1           | 21        | 2860         | 2879       | GCAGCAUUAUCAAGAUUCACA    | UCUGAGU-UUGAGGAUGCUGC    | Cleavage    |
| gra-miR172b  | Gorai.005G259100 | 1           | 21        | 1521         | 1541       | GCAGCAUUAUCAAGAUUCACA    | AGGGAGUCUAAAAGAUGCUGC    | Translation |
| gra-miR172b  | Gorai.008G041100 | 1           | 21        | 1926         | 1946       | GCAGCAUUAUCAAGAUUCACA    | AGGGAGUCUAAAAGAUGCUGC    | Translation |
| gra-miR172b  | Gorai.002G206700 | 1           | 21        | 1875         | 1895       | GCAGCAUUAUCAAGAUUCACA    | AGGGAGUCUAAAAGAUGCUGC    | Translation |
| gra-miR3267  | Gorai.007G043100 | 1           | 22        | 383          | 404        | UCUGUCGCGAGGGGAGAUGGCUG  | UUUCUGACUCUCUUGCGGUGGA   | Cleavage    |
| gra-miR3476  | Gorai.007G067100 | 1           | 21        | 676          | 696        | UCGGACUGGAUUUGUUGACAA    | UCAUCAUCAGAUCCUGUCCGU    | Cleavage    |
| gra-miR398   | Gorai.005G259100 | 1           | 21        | 2043         | 2063       | UGUGUUCUCAGGUCACCCCUU    | CGGGGGUGACUUGAGAGUAAA    | Cleavage    |
| gra-miR398   | Gorai.002G103800 | 1           | 21        | 513          | 533        | UGUGUUCUCAGGUCACCCCUU    | UAAGGGUGGCCCCAGAGCACA    | Translation |
| gra-miR482   | Gorai.010G148800 | 1           | 22        | 1359         | 1380       | UCUUUCCAAUCCUCCCAUUCC    | GGGUGGGGAGGAAUUGGGUAGA   | Cleavage    |
| gra-miR482   | Gorai.001G185100 | 1           | 22        | 3757         | 3778       | UCUUUCCAAUCCUCCCAUUCC    | AUUAAUUGGGGGAAUUGGAAGA   | Cleavage    |
| gra-miR482   | Gorai.004G101000 | 1           | 22        | 3241         | 3262       | UCUUUCCAAUCCUCCCAUUCC    | AUAAUUGGGGGAAUUGUAAACA   | Cleavage    |
| gra-miR482   | Gorai.009G006600 | 1           | 22        | 3151         | 3172       | UCUUUCCAAUCCUCCCAUUCC    | AUAAUUGGAGGAAUUGUAACA    | Cleavage    |
| gra-miR482   | Gorai.002G110000 | 1           | 22        | 3553         | 3574       | UCUUUCCAAUCCUCCCAUUCC    | AUUAAUAGGAGGAAUUGUAAGCA  | Cleavage    |
| gra-miR482   | Gorai.005G035500 | 1           | 22        | 3100         | 3121       | UCUUUCCAAUCCUCCCAUUCC    | AUCAUUGGUGGAAUUGUAAACA   | Cleavage    |
| gra-miR5207  | Gorai.009G348900 | 1           | 24        | 832          | 855        | CUUAAGGUGGGUUUGGAUGGGCGA | CCUCCGAUCCGGGUCCACGUUGAG | Cleavage    |
| gra-miR530a  | Gorai.006G266700 | 1           | 21        | 2098         | 2118       | AGGUGCAGAUGCAGUUGCAGG    | GCUGUAGCUGUAACUGUAACU    | Cleavage    |
| gra-miR530a  | Gorai.012G145600 | 1           | 21        | 1096         | 1116       | AGGUGCAGAUGCAGUUGCAGG    | CCAGCACCUGCAUCAGCAUCA    | Cleavage    |
| gra-miR530a  | Gorai.009G114800 | 1           | 21        | 1251         | 1272       | AGGUGCAGAU-UGCAGUUGCAGG  | GGUGCAACUGAAAUCUGCACUU   | Translation |
| gra-miR530a  | Gorai.009G114800 | 1           | 21        | 1459         | 1479       | AGGUGCAGAUGCAGUUGCAGG    | GCUGCUCGUGCAACUGCACUU    | Cleavage    |
| gra-miR530a  | Gorai.003G115800 | 1           | 21        | 2011         | 2031       | AGGUGCAGAUGCAGUUGCAGG    | ACUCCACCUUCAUCUGUGUCU    | Cleavage    |
| gra-miR530b  | Gorai.009G114800 | 1           | 21        | 1459         | 1479       | AGGUGCAGGUGCAGGCGCAGC    | GCUGCUCGUGCAACUGCACUU    | Cleavage    |
| gra-miR530b  | Gorai.001G068000 | 1           | 21        | 343          | 363        | AGGUGCAGGUGCAGGCGCAGC    | GAUUCCCUUGUAUCUGUAUCU    | Cleavage    |
| gra-miR530b  | Gorai.012G145600 | 1           | 21        | 1090         | 1110       | AGGUGCAGGUGCAGGCGCAGC    | CCAGCUCCAGCACCUGCAUCA    | Cleavage    |
| gra-miR5741  | Gorai.004G101000 | 1           | 21        | 1310         | 1330       | UAGUAUAAGGACUAAAUUGGU    | ACCAAUUGAAUCCUUGUGUUG    | Cleavage    |
| gra-miR5741  | Gorai.006G007000 | 1           | 21        | 1232         | 1252       | UAGUAUAAGGACUAAAUUGGU    | AUCGAUUCAGUUUUGGUACUG    | Cleavage    |
| gra-miR7484c | Gorai.009G059900 | 1           | 20        | 323          | 342        | AGAAGUCGAAUUGCAUUUUG     | AUGAAUGUAAUUUGGCUUUA     | Cleavage    |
| gra-miR7484c | Gorai.013G236600 | 1           | 20        | 293          | 312        | AGAAGUCGAAUUGCAUUUUG     | GUGAAUGUAAUUUGGCUUUA     | Cleavage    |
| gra-miR7484c | Gorai.006G206500 | 1           | 20        | 2647         | 2666       | AGAAGUCGAAUUGCAUUUUG     | GAAGAUAAUUUAGAUUUCG      | Cleavage    |
| gra-miR7484g | Gorai.008G049200 | 1           | 24        | 3456         | 3479       | UUCUUAAUAGUUAGAUCAAAGAGC | GCAUUUUGAUUUAAAAUGUGACAA | Translation |
| gra-miR7484g | Gorai.002G110000 | 1           | 24        | 3192         | 3215       | UUCUUAAUAGUUAGAUCAAAGAGC | GCAUUUUGAUCUGAAAUGUGACAA | Translation |
| gra-miR7484g | Gorai.001G185100 | 1           | 24        | 3486         | 3509       | UUCUUAAUAGUUAGAUCAAAGAGC | CCAUUUUGAUCUGAAAUGUGAUAA | Translation |
| gra-miR7484g | Gorai.004G225000 | 1           | 24        | 3357         | 3380       | UUCUUAAUAGUUAGAUCAAAGAGC | CCAUUUUGAUCUGAAAUGUGACAA | Translation |

|              |                  |   |    |      |      |                           |                           |             |
|--------------|------------------|---|----|------|------|---------------------------|---------------------------|-------------|
| gra-miR7484g | Gorai.013G214100 | 1 | 24 | 408  | 431  | UUCUUUAUUGUUAGAUCAAAGAGC  | UAGAUUGGAUUUAGCUUAUAGGGA  | Cleavage    |
| gra-miR7484g | Gorai.009G059900 | 1 | 24 | 405  | 428  | UUCUUUAUUGUUAGAUCAAAGAGC  | UAGAUUGGAUUUAGCUUAUAGGGA  | Cleavage    |
| gra-miR7484g | Gorai.004G101000 | 1 | 24 | 2970 | 2993 | UUCUUUAUUGUUAGAUCAAAGAGC  | ACAUUUUGAUUUUGAAAUGUGAAAA | Translation |
| gra-miR7484g | Gorai.009G006600 | 1 | 24 | 2880 | 2903 | UUCUUUAUUGUUAGAUCAAAGAGC  | ACAUUUUGAUUUUGAAAUGUGAAAA | Translation |
| gra-miR7484h | Gorai.006G007000 | 1 | 21 | 988  | 1008 | UUUAACCGUAGAAAUGGAUGA     | GCAGCAAUUUCUAUGGUUGAA     | Cleavage    |
| gra-miR7484h | Gorai.007G067100 | 1 | 21 | 994  | 1014 | UUUAACCGUAGAAAUGGAUGA     | GCAGCAAUUUCUAUGGUUGAA     | Cleavage    |
| gra-miR7484h | Gorai.009G114800 | 1 | 21 | 1725 | 1745 | UUUAACCGUAGAAAUGGAUGA     | AGAUUCAUGUCUGUGGUUGAC     | Cleavage    |
| gra-miR7484i | Gorai.006G007000 | 1 | 21 | 988  | 1008 | UUUAACCGUAGAAAUGGAUGA     | GCAGCAAUUUCUAUGGUUGAA     | Cleavage    |
| gra-miR7484i | Gorai.007G067100 | 1 | 21 | 994  | 1014 | UUUAACCGUAGAAAUGGAUGA     | GCAGCAAUUUCUAUGGUUGAA     | Cleavage    |
| gra-miR7484i | Gorai.009G114800 | 1 | 21 | 1725 | 1745 | UUUAACCGUAGAAAUGGAUGA     | AGAUUCAUGUCUGUGGUUGAC     | Cleavage    |
| gra-miR7484m | Gorai.004G101000 | 1 | 21 | 2971 | 2991 | UUUGUAUGUUAGAUCGAAGAG     | CAUUUUGAUUUUGAAAUGUGAA    | Cleavage    |
| gra-miR7484m | Gorai.009G006600 | 1 | 21 | 2881 | 2901 | UUUGUAUGUUAGAUCGAAGAG     | CAUUUUGAUUUUGAAAUGUGAA    | Cleavage    |
| gra-miR7484m | Gorai.003G120400 | 1 | 21 | 1250 | 1270 | UUUGUAUGUUAGAUCGAAGAG     | CAUUUGGCUUUAAAAUACAAG     | Cleavage    |
| gra-miR7484n | Gorai.006G266700 | 1 | 24 | 99   | 122  | CUAGUUUGCUCUUUGAUCUAAUGU  | UAUAGAUAAUUAUGAGCAAACUAG  | Cleavage    |
| gra-miR7484n | Gorai.002G103800 | 1 | 24 | 1603 | 1626 | CUAGUUUGCUCUUUGAUCUAAUGU  | UUGGAAGAGCAGAGAGCGAAUGAG  | Cleavage    |
| gra-miR7484n | Gorai.005G133400 | 1 | 24 | 358  | 381  | CUAGUUUGCUCUUUGAUCUAAUGU  | GAAGCAAAUGAAAAGGGCAAGCCAG | Cleavage    |
| gra-miR7484n | Gorai.013G236600 | 1 | 24 | 15   | 38   | CUAGUUUGCUCUUUGAUCUAAUGU  | UGUAAAGAACAAGAAGCAAACAGG  | Translation |
| gra-miR7486f | Gorai.006G007000 | 1 | 24 | 1437 | 1460 | CGCUUUGCUGACGUGGAAACAAAU  | GGAUUUUCCGAGUCAGCUGAGCA   | Cleavage    |
| gra-miR7486f | Gorai.002G206700 | 1 | 24 | 1327 | 1350 | CGCUUUGCUGACGUGGAAACAAAU  | AAAGAUUGCCAUGACAGUGAAGCA  | Translation |
| gra-miR7486f | Gorai.005G259100 | 1 | 24 | 1090 | 1113 | CGCUUUGCUGACGUGGAAACAAAU  | AAGGAUUGUCAUGACAGCGAAGCA  | Translation |
| gra-miR7486g | Gorai.006G007000 | 1 | 24 | 1437 | 1460 | CGCUUUGCUGACGUGGAAACAAAU  | GGAUUUUCCGAGUCAGCUGAGCA   | Cleavage    |
| gra-miR7486g | Gorai.002G206700 | 1 | 24 | 1327 | 1350 | CGCUUUGCUGACGUGGAAACAAAU  | AAAGAUUGCCAUGACAGUGAAGCA  | Translation |
| gra-miR7486g | Gorai.005G259100 | 1 | 24 | 1090 | 1113 | CGCUUUGCUGACGUGGAAACAAAU  | AAGGAUUGUCAUGACAGCGAAGCA  | Translation |
| gra-miR7486i | Gorai.008G160900 | 1 | 23 | 51   | 73   | GCUGACGUGGAAGGAAAUCCGCUA  | GGGUAAAAUCCUCCACGUUAUC    | Cleavage    |
| gra-miR7486j | Gorai.007G046900 | 1 | 24 | 433  | 456  | CAUCAGCGCGAUGUCAGGGGACGU  | CUCUCCUCUGAUGUUGCUUUGAUA  | Cleavage    |
| gra-miR7492d | Gorai.004G198100 | 1 | 24 | 946  | 969  | UGGGCUUAGAUUUUUUGCGGCGUU  | AAUUGGGUGGAAAGUUUAAGUUCA  | Cleavage    |
| gra-miR7492d | Gorai.005G126000 | 1 | 24 | 1798 | 1821 | UGGGCUUAGAUUUUUUGCGGCGUU  | ACAGCAGAAAAAAUGUGAGCUUA   | Cleavage    |
| gra-miR7492e | Gorai.007G309200 | 1 | 21 | 1757 | 1777 | CCAUGAUCUUUAGCGGCGUUU     | UCAUACGGCAAAAAGGUUAUGG    | Cleavage    |
| gra-miR7492f | Gorai.007G309200 | 1 | 21 | 1757 | 1777 | CCAUGAUCUUUAGCGGCGUUU     | UCAUACGGCAAAAAGGUUAUGG    | Cleavage    |
| gra-miR7492o | Gorai.006G266700 | 1 | 24 | 245  | 268  | CUAAAGAUCUGAGCAUUAUGUGGCG | UGCAGCGGAUGCUUAGUUUUUAG   | Cleavage    |
| gra-miR7492o | Gorai.005G259100 | 1 | 24 | 429  | 452  | CUAAAGAUCUGAGCAUUAUGUGGCG | GACACCUGAUGUUCGUUUCUUUAG  | Cleavage    |
| gra-miR7493b | Gorai.010G056300 | 1 | 24 | 2720 | 2743 | UUGGAUUGUUAAAAGGUUAAUUGU  | CCAACUCACUUUUAGCAAUCAAG   | Cleavage    |
| gra-miR7493b | Gorai.009G012400 | 1 | 24 | 2858 | 2881 | UUGGAUUGUUAAAAGGUUAAUUGU  | CAGAUUCACUCUUUAGCAAUCAAG  | Cleavage    |
| gra-miR7493b | Gorai.009G059900 | 1 | 24 | 430  | 453  | UUGGAUUGUUAAAAGGUUAAUUGU  | GUUUUAAAUGUUUUAAACCAUUGAA | Cleavage    |
| gra-miR7494b | Gorai.010G253900 | 1 | 23 | 698  | 720  | AGAGGGAGAAGCAGAAGAGAAUA   | CGGUUGUUUCUUCUUCUCCUUUU   | Cleavage    |
| gra-miR7494b | Gorai.009G348900 | 1 | 23 | 796  | 819  | AGAGGGAGAAGCAGAAG-AGAAUA  | GGUUCUACUUCUUCUUCUCCUUCG  | Cleavage    |
| gra-miR7494b | Gorai.004G225000 | 1 | 23 | 297  | 318  | AGAGGGAGAAGCAGAAGAGAAUA   | UGAUCU-UUCUGAUUUUUCUUCU   | Translation |
| gra-miR7494b | Gorai.008G041100 | 1 | 23 | 191  | 213  | AGAGGGAGAAGCAGAAGAGAAUA   | CCGGCUCUAAUACUUUCCUUUU    | Cleavage    |
| gra-miR7494c | Gorai.013G209900 | 1 | 24 | 514  | 537  | AUGGAGGAAAACAGAGGGAGAAAGC | CGUCCUCUUUCUGUUGUCCCUAU   | Cleavage    |
| gra-miR7494e | Gorai.010G253900 | 1 | 21 | 315  | 335  | UCGUGAUCUUUAGCGGUGUUU     | GACUACCGAUGAAGAUUCUCGA    | Cleavage    |
| gra-miR7494e | Gorai.007G309200 | 1 | 21 | 1757 | 1777 | UCGUGAUCUUUAGCGGUGUUU     | UCAUACGGCAAAAAGGUUAUGG    | Cleavage    |
| gra-miR7494f | Gorai.010G253900 | 1 | 21 | 315  | 335  | UCGUGAUCUUUAGCGGUGUUU     | GACUACCGAUGAAGAUUCUCGA    | Cleavage    |
| gra-miR7494f | Gorai.007G309200 | 1 | 21 | 1757 | 1777 | UCGUGAUCUUUAGCGGUGUUU     | UCAUACGGCAAAAAGGUUAUGG    | Cleavage    |
| gra-miR7502b | Gorai.005G035500 | 1 | 21 | 2781 | 2801 | UUGUAAAAAGUUUCAUCCAUAU    | ACUGGAUGCAGCUUUUGGCAU     | Cleavage    |
| gra-miR7502b | Gorai.004G225000 | 1 | 21 | 3309 | 3329 | UUGUAAAAAGUUUCAUCCAUAU    | CAUGGGUGCAGCUUUUGGCAU     | Cleavage    |
| gra-miR7502b | Gorai.009G012400 | 1 | 21 | 2574 | 2594 | UUGUAAAAAGUUUCAUCCAUAU    | UUUGGAUAAUAUCUUUAACAA     | Cleavage    |

|              |                  |   |    |      |      |                           |                          |             |
|--------------|------------------|---|----|------|------|---------------------------|--------------------------|-------------|
| gra-miR7502b | Gorai.005G072800 | 1 | 21 | 525  | 545  | UUGUUAAAAGUUUCAUCCAUU     | CGUAGGUCAGACUUUUAUAC     | Cleavage    |
| gra-miR7502b | Gorai.001G185100 | 1 | 21 | 3438 | 3458 | UUGUUAAAAGUUUCAUCCAUU     | CAGGGAUGCAGCUUUUGGCAU    | Cleavage    |
| gra-miR7502c | Gorai.005G035500 | 1 | 21 | 2781 | 2801 | UUGUUAAAAGUUUCAUCCAUU     | ACUGGAUGCAGCUUUUGGCAU    | Cleavage    |
| gra-miR7502c | Gorai.004G225000 | 1 | 21 | 3309 | 3329 | UUGUUAAAAGUUUCAUCCAUU     | CAUGGGUGCAGCUUUUGGCAU    | Cleavage    |
| gra-miR7502c | Gorai.009G012400 | 1 | 21 | 2574 | 2594 | UUGUUAAAAGUUUCAUCCAUU     | UUUGGAUAAUAUCUUUAACAA    | Cleavage    |
| gra-miR7502c | Gorai.005G072800 | 1 | 21 | 525  | 545  | UUGUUAAAAGUUUCAUCCAUU     | CGUAGGUCAGACUUUUAUAC     | Cleavage    |
| gra-miR7502c | Gorai.001G185100 | 1 | 21 | 3438 | 3458 | UUGUUAAAAGUUUCAUCCAUU     | CAGGGAUGCAGCUUUUGGCAU    | Cleavage    |
| gra-miR7502d | Gorai.006G007000 | 1 | 24 | 987  | 1010 | CUUUUAAACAGUAGAAUUUGAUGGA | UGCAGCAAUUUCUAUGGUUGAAAG | Cleavage    |
| gra-miR7502d | Gorai.007G067100 | 1 | 24 | 993  | 1016 | CUUUUAAACAGUAGAAUUUGAUGGA | UGCAGCAAUUUCUAUGGUUGAAAG | Cleavage    |
| gra-miR7502d | Gorai.005G035500 | 1 | 24 | 2511 | 2534 | CUUUUAAACAGUAGAAUUUGAUGGA | AGGAACAGAAGUUGCUGUUAAGAG | Cleavage    |
| gra-miR7502d | Gorai.008G041100 | 1 | 24 | 342  | 365  | CUUUUAAACAGUAGAAUUUGAUGGA | AACUGGAAGUUUUUAGUUGAAGG  | Cleavage    |
| gra-miR7502d | Gorai.004G225000 | 1 | 24 | 3095 | 3118 | CUUUUAAACAGUAGAAUUUGAUGGA | CAGAACAAGAUCGACUGAUGAAAG | Cleavage    |
| gra-miR7502d | Gorai.002G103800 | 1 | 24 | 1857 | 1880 | CUUUUAAACAGUAGAAUUUGAUGGA | AAAUCUAGAUACUGCUGUUGAGCG | Cleavage    |
| gra-miR7502e | Gorai.006G007000 | 1 | 21 | 987  | 1007 | UUAACGGUAGAAAUGGAUGAA     | UGCAGCAAUUUCUAUGGUUGA    | Cleavage    |
| gra-miR7502e | Gorai.007G067100 | 1 | 21 | 993  | 1013 | UUAACGGUAGAAAUGGAUGAA     | UGCAGCAAUUUCUAUGGUUGA    | Cleavage    |
| gra-miR7502e | Gorai.005G035500 | 1 | 21 | 909  | 929  | UUAACGGUAGAAAUGGAUGAA     | UCAGUAUGUUUUUGCUGUUA     | Cleavage    |
| gra-miR7502e | Gorai.007G184900 | 1 | 21 | 342  | 362  | UUAACGGUAGAAAUGGAUGAA     | ACUGUCCUUUUUCCCGUUAG     | Cleavage    |
| gra-miR7502f | Gorai.001G185100 | 1 | 21 | 745  | 765  | UUUAGCAGUAGAAUAGAUGA      | AUAUCUGUUUCUUCUGAUGAA    | Cleavage    |
| gra-miR7502f | Gorai.004G225000 | 1 | 21 | 757  | 777  | UUUAGCAGUAGAAUAGAUGA      | AUAUCUGUUUCUUCUGAUGAA    | Cleavage    |
| gra-miR7502f | Gorai.005G035500 | 1 | 21 | 910  | 930  | UUUAGCAGUAGAAUAGAUGA      | CAGUAUGUUUUUGCUGUUAU     | Cleavage    |
| gra-miR7502f | Gorai.007G067100 | 1 | 21 | 994  | 1014 | UUUAGCAGUAGAAUAGAUGA      | GCAGCAAUUUCUAUGGUUGAA    | Cleavage    |
| gra-miR7502f | Gorai.006G007000 | 1 | 21 | 988  | 1008 | UUUAGCAGUAGAAUAGAUGA      | GCAGCAAUUUCUAUGGUUGAA    | Cleavage    |
| gra-miR7504c | Gorai.001G068000 | 1 | 24 | 438  | 461  | AAGAGAAAAAUCGGAUUUAUCAU   | CUCGAGAAUCCGUUUGUUUCUUU  | Cleavage    |
| gra-miR7504g | Gorai.013G236600 | 1 | 24 | 1975 | 1998 | AGGAGGAAUCUGAUUUUGUCAUUC  | AAGUGGCAGAGCAGAAUCCUUCA  | Cleavage    |
| gra-miR7504g | Gorai.009G278600 | 1 | 24 | 585  | 608  | AGGAGGAAUCUGAUUUUGUCAUUC  | GGUUGCCAAUCCUGAUUCCUCUU  | Cleavage    |
| gra-miR7504h | Gorai.007G184900 | 1 | 24 | 331  | 353  | AGGAGGAAUAAGUCUGAUUUUGUCA | UCACGAAUCAGACU-GUUCCUUUU | Translation |
| gra-miR7504h | Gorai.005G013500 | 1 | 24 | 544  | 567  | AGGAGGAAUAAGUCUGAUUUUGUCA | UAUAUACUCGAGCUUUUUCUCCU  | Cleavage    |
| gra-miR7504k | Gorai.004G198100 | 1 | 24 | 718  | 741  | UUUCUCCUGAUUUUUAGCAUUUUU  | AACAGUAAUAAUAAUCAAGAGAAA | Cleavage    |
| gra-miR7504l | Gorai.004G198100 | 1 | 24 | 718  | 741  | UUUCUCCUGAUUUUUAGCAUUUUU  | AACAGUAAUAAUAAUCAAGAGAAA | Cleavage    |
| gra-miR7504m | Gorai.004G198100 | 1 | 24 | 718  | 741  | UUUCUCCUGAUUUUUAGCAUUUUU  | AACAGUAAUAAUAAUCAAGAGAAA | Cleavage    |
| gra-miR7506b | Gorai.004G109400 | 1 | 20 | 107  | 126  | CUGGGACAUGGCGUUGGCAA      | UUUUCAUUGCCAUGUCUCAA     | Cleavage    |
| gra-miR7506b | Gorai.010G056300 | 1 | 20 | 368  | 387  | CUGGGACAUGGCGUUGGCAA      | CUGCUAAUGCCGUGCAUCAG     | Cleavage    |
| gra-miR7584e | Gorai.009G187500 | 1 | 21 | 2703 | 2723 | AGGAGUUAGAUAUGUAUUUUAU    | GGGAAACACAAUUAGACUCCU    | Cleavage    |
| gra-miR7584e | Gorai.003G074300 | 1 | 21 | 2694 | 2714 | AGGAGUUAGAUAUGUAUUUUAU    | GGAAGAUUAUUCAGAUUUUCG    | Cleavage    |
| gra-miR827b  | Gorai.009G012400 | 1 | 21 | 1013 | 1033 | UUUGUUUAUGGUCAUCUAAGC     | AUUUAAAUGACAAUGGGCAGA    | Translation |
| gra-miR827b  | Gorai.002G206700 | 1 | 21 | 448  | 468  | UUUGUUUAUGGUCAUCUAAGC     | AUCUGGGUGCCUGUAAACAGA    | Cleavage    |
| gra-miR827b  | Gorai.010G056300 | 1 | 21 | 1001 | 1021 | UUUGUUUAUGGUCAUCUAAGC     | AUUUGCAUGACAAUGGGCAGA    | Translation |
| gra-miR8633  | Gorai.009G187500 | 1 | 22 | 2778 | 2799 | UAAGUGAAGAAAGAGGUAGGUU    | CGUUUCCUGCUUUCUUCACAU    | Cleavage    |
| gra-miR8633  | Gorai.007G184900 | 1 | 22 | 503  | 523  | UAAGUGAAGAAAGAGGUAGGUU    | GUUCUACUUCUU-CUUCGCUUU   | Translation |
| gra-miR8641  | Gorai.006G206500 | 1 | 24 | 2058 | 2081 | UUUUUACUUUGGGACACUGAUGGC  | ACCUUUGGAGCCUCAAGGUGAAAA | Cleavage    |
| gra-miR8641  | Gorai.003G120400 | 1 | 24 | 384  | 406  | UUUUUACUUUGGGACACUGAUGGC  | GACACCAGU-UUCCAAAGUAAUGA | Cleavage    |
| gra-miR8641  | Gorai.001G058100 | 1 | 24 | 342  | 364  | UUUUUACUUUGGGACACUGAUGGC  | AACACCAGU-UUCUAAAGUAAUGA | Cleavage    |
| gra-miR8646  | Gorai.009G187500 | 1 | 21 | 2727 | 2747 | UAGUGAGGAUGGGAAAAUUUGU    | ACAAGCUUCUCAUCAUCACUU    | Cleavage    |
| gra-miR8646  | Gorai.002G115800 | 1 | 21 | 2727 | 2747 | UAGUGAGGAUGGGAAAAUUUGU    | GCAAGUUUCACAUCAUCAUUU    | Cleavage    |
| gra-miR8646  | Gorai.008G049200 | 1 | 21 | 2713 | 2733 | UAGUGAGGAUGGGAAAAUUUGU    | CUGGGUUUCUCAUCUCCACUU    | Cleavage    |
| gra-miR8646  | Gorai.002G110000 | 1 | 21 | 825  | 846  | UAGUGAGGAUGGGAA-AUUUGU    | UAGAAUGUUUCUGUUCUCACUG   | Cleavage    |

|              |                  |   |    |      |      |                            |                          |             |
|--------------|------------------|---|----|------|------|----------------------------|--------------------------|-------------|
| gra-miR8647  | Gorai.002G103800 | 1 | 21 | 1607 | 1627 | ACCGAUUUGCUCUUUGAUCUA      | AAGAGCAGAGAGCGAAUGAGU    | Cleavage    |
| gra-miR8648  | Gorai.011G138700 | 1 | 21 | 829  | 849  | UUUCAGCGCAGUAGAAGGAUU      | UCUUGUUGUGCUGUGCUGGAA    | Cleavage    |
| gra-miR8648  | Gorai.005G126000 | 1 | 21 | 868  | 888  | UUUCAGCGCAGUAGAAGGAUU      | UCUUGUUGUGCUGUGUUGGAA    | Cleavage    |
| gra-miR8649  | Gorai.009G187500 | 1 | 24 | 1041 | 1064 | ACACUGUGGAAGUGGAUCUCUCUC   | CACUGAGAACUACUUUCAUUGUGU | Cleavage    |
| gra-miR8651  | Gorai.001G185100 | 1 | 24 | 1539 | 1562 | UUAAUGGAUCAUAACAGCAGGUAU   | AAGCCUGUUGUCAGGAUCUGUUGA | Translation |
| gra-miR8652  | Gorai.001G185100 | 1 | 23 | 1468 | 1490 | AUU AUGUGUAUGAAACUUUAGUU   | CAUGAAAGGUUUAUGCACAAAGA  | Cleavage    |
| gra-miR8655  | Gorai.002G206700 | 1 | 21 | 2608 | 2628 | AUAUGUUCUGAUUAUAUCUGU      | GAAGAUGUCAGCAGAAUGUGU    | Translation |
| gra-miR8655  | Gorai.007G043100 | 1 | 21 | 590  | 610  | AUAUGUUCUGAUUAUAUCUGU      | CUAUAUCUGGUCAGAAUACAU    | Cleavage    |
| gra-miR8656  | Gorai.009G012400 | 1 | 21 | 1273 | 1293 | UGGAAAAGUGGUAAUAAGGGG      | AAUCCUGUUGCUGCUUAUCCA    | Cleavage    |
| gra-miR8657a | Gorai.007G043100 | 1 | 24 | 643  | 666  | UGUAGUAAUUGUAGAAGUUCAGGG   | CCGUCACUGUCUACAAUUAUCACA | Cleavage    |
| gra-miR8657a | Gorai.003G120400 | 1 | 24 | 688  | 711  | UGUAGUAAUUGUAGAAGUUCAGGG   | CCCUCACUGUCUACGAUUAUAACA | Cleavage    |
| gra-miR8657a | Gorai.001G058100 | 1 | 24 | 646  | 669  | UGUAGUAAUUGUAGAAGUUCAGGG   | CCCUCACUGUCUACAAUAAUUGCA | Cleavage    |
| gra-miR8657a | Gorai.009G114800 | 1 | 24 | 1961 | 1984 | UGUAGUAAUUGUAGAAGUUCAGGG   | AAAGGAGUUUAUAUGAUUAUUGCU | Cleavage    |
| gra-miR8657a | Gorai.012G145600 | 1 | 24 | 753  | 776  | UGUAGUAAUUGUAGAAGUUCAGGG   | UCAAGAACAUCUACAAGAAUUGCA | Cleavage    |
| gra-miR8657a | Gorai.005G072800 | 1 | 24 | 1949 | 1972 | UGUAGUAAUUGUAGAAGUUCAGGG   | GCAAGAAUGUGUAUGAUUACUGCU | Cleavage    |
| gra-miR8657b | Gorai.007G043100 | 1 | 24 | 643  | 666  | UGUAGUAAUUGUAGAAGUUCAGGG   | CCGUCACUGUCUACAAUUAUCACA | Cleavage    |
| gra-miR8657b | Gorai.003G120400 | 1 | 24 | 688  | 711  | UGUAGUAAUUGUAGAAGUUCAGGG   | CCCUCACUGUCUACGAUUAUAACA | Cleavage    |
| gra-miR8657b | Gorai.001G058100 | 1 | 24 | 646  | 669  | UGUAGUAAUUGUAGAAGUUCAGGG   | CCCUCACUGUCUACAAUAAUUGCA | Cleavage    |
| gra-miR8657b | Gorai.009G114800 | 1 | 24 | 1961 | 1984 | UGUAGUAAUUGUAGAAGUUCAGGG   | AAAGGAGUUUAUAUGAUUAUUGCU | Cleavage    |
| gra-miR8657b | Gorai.012G145600 | 1 | 24 | 753  | 776  | UGUAGUAAUUGUAGAAGUUCAGGG   | UCAAGAACAUCUACAAGAAUUGCA | Cleavage    |
| gra-miR8657b | Gorai.005G072800 | 1 | 24 | 1949 | 1972 | UGUAGUAAUUGUAGAAGUUCAGGG   | GCAAGAAUGUGUAUGAUUACUGCU | Cleavage    |
| gra-miR8657c | Gorai.007G043100 | 1 | 24 | 643  | 666  | UGUAGUAAUUGUAGAAGUUCAGGG   | CCGUCACUGUCUACAAUUAUCACA | Cleavage    |
| gra-miR8657c | Gorai.003G120400 | 1 | 24 | 688  | 711  | UGUAGUAAUUGUAGAAGUUCAGGG   | CCCUCACUGUCUACGAUUAUAACA | Cleavage    |
| gra-miR8657c | Gorai.001G058100 | 1 | 24 | 646  | 669  | UGUAGUAAUUGUAGAAGUUCAGGG   | CCCUCACUGUCUACAAUAAUUGCA | Cleavage    |
| gra-miR8657c | Gorai.009G114800 | 1 | 24 | 1961 | 1984 | UGUAGUAAUUGUAGAAGUUCAGGG   | AAAGGAGUUUAUAUGAUUAUUGCU | Cleavage    |
| gra-miR8657c | Gorai.012G145600 | 1 | 24 | 753  | 776  | UGUAGUAAUUGUAGAAGUUCAGGG   | UCAAGAACAUCUACAAGAAUUGCA | Cleavage    |
| gra-miR8657c | Gorai.005G072800 | 1 | 24 | 1949 | 1972 | UGUAGUAAUUGUAGAAGUUCAGGG   | GCAAGAAUGUGUAUGAUUACUGCU | Cleavage    |
| gra-miR8657d | Gorai.007G043100 | 1 | 24 | 643  | 666  | UGUAGUAAUUGUAGAAGUUCAGGG   | CCGUCACUGUCUACAAUUAUCACA | Cleavage    |
| gra-miR8657d | Gorai.001G058100 | 1 | 24 | 646  | 669  | UGUAGUAAUUGUAGAAGUUCAGGG   | CCCUCACUGUCUACAAUAAUUGCA | Cleavage    |
| gra-miR8657d | Gorai.003G120400 | 1 | 24 | 688  | 711  | UGUAGUAAUUGUAGAAGUUCAGGG   | CCCUCACUGUCUACGAUUAUAACA | Cleavage    |
| gra-miR8657d | Gorai.009G114800 | 1 | 24 | 1961 | 1984 | UGUAGUAAUUGUAGAAGUUCAGGG   | AAAGGAGUUUAUAUGAUUAUUGCU | Cleavage    |
| gra-miR8657d | Gorai.012G145600 | 1 | 24 | 753  | 776  | UGUAGUAAUUGUAGAAGUUCAGGG   | UCAAGAACAUCUACAAGAAUUGCA | Cleavage    |
| gra-miR8657d | Gorai.005G072800 | 1 | 24 | 1949 | 1972 | UGUAGUAAUUGUAGAAGUUCAGGG   | GCAAGAAUGUGUAUGAUUACUGCU | Cleavage    |
| gra-miR8657e | Gorai.007G043100 | 1 | 24 | 643  | 666  | UGUAGUAAUUGUAGAAGUUCAGGG   | CCGUCACUGUCUACAAUUAUCACA | Cleavage    |
| gra-miR8657e | Gorai.001G058100 | 1 | 24 | 646  | 669  | UGUAGUAAUUGUAGAAGUUCAGGG   | CCCUCACUGUCUACAAUAAUUGCA | Cleavage    |
| gra-miR8657e | Gorai.003G120400 | 1 | 24 | 688  | 711  | UGUAGUAAUUGUAGAAGUUCAGGG   | CCCUCACUGUCUACGAUUAUAACA | Cleavage    |
| gra-miR8657e | Gorai.009G114800 | 1 | 24 | 1961 | 1984 | UGUAGUAAUUGUAGAAGUUCAGGG   | AAAGGAGUUUAUAUGAUUAUUGCU | Cleavage    |
| gra-miR8657e | Gorai.012G145600 | 1 | 24 | 753  | 776  | UGUAGUAAUUGUAGAAGUUCAGGG   | UCAAGAACAUCUACAAGAAUUGCA | Cleavage    |
| gra-miR8657e | Gorai.005G072800 | 1 | 24 | 1949 | 1972 | UGUAGUAAUUGUAGAAGUUCAGGG   | GCAAGAAUGUGUAUGAUUACUGCU | Cleavage    |
| gra-miR8658  | Gorai.001G185100 | 1 | 21 | 1417 | 1437 | UUUGAAAAGUACAGGGACUAU      | GUUUUUUUUGUAGUUUACAAC    | Cleavage    |
| gra-miR8658  | Gorai.007G046900 | 1 | 21 | 112  | 132  | UUUGAAAAGUACAGGGACUAU      | AAAAUUUCUGGGCUUUUCAAU    | Translation |
| gra-miR8658  | Gorai.007G309200 | 1 | 21 | 1402 | 1422 | UUUGAAAAGUACAGGGACUAU      | UCAAUCUCUGAAAUUUUCAAG    | Translation |
| gra-miR8658  | Gorai.013G209900 | 1 | 21 | 1375 | 1395 | UUUGAAAAGUACAGGGACUAU      | UCAAUCUCUGAAAUUUUCAAG    | Translation |
| gra-miR8659a | Gorai.002G110000 | 1 | 24 | 1508 | 1531 | AAUUUUUUU AAGGUUGUUUGUGGAA | UGCCGCAUUUCACUUUAAAAAUG  | Cleavage    |
| gra-miR8659a | Gorai.004G101000 | 1 | 24 | 1721 | 1744 | AAUUUUUUU AAGGUUGUUUGUGGAA | GUAACCCAGCAAUUUUGAAAGGUG | Cleavage    |
| gra-miR8659b | Gorai.002G110000 | 1 | 24 | 1508 | 1531 | AAUUUUUUU AAGGUUGUUUGUGGAA | UGCCGCAUUUCACUUUAAAAAUG  | Cleavage    |

|              |                  |   |    |      |      |                           |                           |             |
|--------------|------------------|---|----|------|------|---------------------------|---------------------------|-------------|
| gra-miR8659b | Gorai.004G101000 | 1 | 24 | 1721 | 1744 | AAUUUUUUAAAGGUUGUUUGUGGAA | GUAACCCAGCAAUUUUGAAAGGUG  | Cleavage    |
| gra-miR8661  | Gorai.005G035500 | 1 | 21 | 3168 | 3188 | CAUUACUUUUUCAUUCAUUAA     | AAAGUUA AUGGAAGAGUGUUG    | Cleavage    |
| gra-miR8661  | Gorai.008G049200 | 1 | 21 | 1249 | 1270 | CAUUACU-UUUUCAUUCAUUAA    | CAGAUUGGAUGGGAAGAGUAAUG   | Cleavage    |
| gra-miR8661  | Gorai.013G214100 | 1 | 21 | 1066 | 1086 | CAUUACUUUUUCAUUCAUUAA     | GGAAUGAAUAAAGAGGAGGUG     | Cleavage    |
| gra-miR8661  | Gorai.003G121600 | 1 | 21 | 577  | 597  | CAUUACUUUUUCAUUCAUUAA     | UUGACUAAUGAGAUAGUGAUG     | Cleavage    |
| gra-miR8661  | Gorai.002G103800 | 1 | 21 | 1841 | 1861 | CAUUACUUUUUCAUUCAUUAA     | UGGAUGGUUGGAAAAGAAAUC     | Cleavage    |
| gra-miR8661  | Gorai.009G012400 | 1 | 21 | 2201 | 2221 | CAUUACUUUUUCAUUCAUUAA     | AAAAUGAAUGUAGAACUGAUA     | Translation |
| gra-miR8661  | Gorai.010G056300 | 1 | 21 | 890  | 912  | CAUUACUUUUUCAU--UCAUUAA   | UGGAUGAGUAUGAGAAAGUGAUU   | Cleavage    |
| gra-miR8661  | Gorai.001G185100 | 1 | 21 | 2254 | 2274 | CAUUACUUUUUCAUUCAUUAA     | GGUUUCA AUGGGAAAGUAAUU    | Cleavage    |
| gra-miR8661  | Gorai.004G101000 | 1 | 21 | 3309 | 3329 | CAUUACUUUUUCAUUCAUUAA     | GGCAUUGAUGGAAAAGUGUUG     | Cleavage    |
| gra-miR8663a | Gorai.005G013500 | 1 | 24 | 1865 | 1888 | UUUGAACUUGGCAACUUUUUUCAC  | UUGCAAAAAGGUUCAAGUUCAAA   | Translation |
| gra-miR8663a | Gorai.004G101000 | 1 | 24 | 1803 | 1826 | UUUGAACUUGGCAACUUUUUUCAC  | UUCACAAAAGAUGCUGGGUUUUAA  | Cleavage    |
| gra-miR8663a | Gorai.013G149700 | 1 | 24 | 1321 | 1344 | UUUGAACUUGGCAACUUUUUUCAC  | GACAAAGCAGCUGCUAAGUCCAG   | Cleavage    |
| gra-miR8665  | Gorai.009G012400 | 1 | 24 | 345  | 368  | UUAAUUUAUUUAUAGAUC AAGGAU | CAAUUUGAGCAAUAUGGUAGUUGG  | Cleavage    |
| gra-miR8667  | Gorai.012G040100 | 1 | 24 | 552  | 575  | UUUCCAAUAGUUUUAUGCCACAUC  | AGACAAGCAUCAACUAUUGAAGA   | Cleavage    |
| gra-miR8667  | Gorai.007G309200 | 1 | 24 | 1675 | 1698 | UUUCCAAUAGUUUUAUGCCACAUC  | CAUAUGGCAUCAAAACUUUGGGGAA | Cleavage    |
| gra-miR8668  | Gorai.001G058100 | 1 | 20 | 1227 | 1246 | UUUUGGAAUCAAGACUACAU      | AUUUACAUUUGGUUUCAAAA      | Cleavage    |
| gra-miR8668  | Gorai.003G121600 | 1 | 20 | 1    | 19   | UUUUGGAAUCAAGACUACAU      | AUG-GGUCUUGAUUUCGCAA      | Cleavage    |
| gra-miR8670a | Gorai.001G185100 | 1 | 24 | 991  | 1014 | AAAGUUGGGCCCCUGUUGGUGCGG  | GGAUGUCAAUUGGGACCCAAUUUG  | Translation |
| gra-miR8670a | Gorai.001G185100 | 1 | 24 | 1029 | 1052 | AAAGUUGGGCCCCUGUUGGUGCGG  | UUUCCCCAAAUGGUGUCCAACUUC  | Translation |
| gra-miR8670b | Gorai.001G185100 | 1 | 24 | 991  | 1014 | AAAGUUGGGCCCCUGUUGGUGCGG  | GGAUGUCAAUUGGGACCCAAUUUG  | Translation |
| gra-miR8670b | Gorai.001G185100 | 1 | 24 | 1029 | 1052 | AAAGUUGGGCCCCUGUUGGUGCGG  | UUUCCCCAAAUGGUGUCCAACUUC  | Translation |
| gra-miR8671  | Gorai.009G012400 | 1 | 24 | 1460 | 1483 | AACUGUUCGUGAUAGAUGUCGGU   | CUCGCCAUGAUGUUAUGAACCGUU  | Cleavage    |
| gra-miR8671  | Gorai.005G013500 | 1 | 24 | 2021 | 2044 | AACUGUUCGUGAUAGAUGUCGGU   | AUGUACCUUUUACUAUGGGCAGUU  | Cleavage    |
| gra-miR8672  | Gorai.009G114800 | 1 | 24 | 1964 | 1987 | AAGAGAAAUAGAUUGUAUGAAACAG | GGAGUUUAUAUGAUUAUUGCUCUG  | Cleavage    |
| gra-miR8675b | Gorai.010G253900 | 1 | 24 | 715  | 738  | AGGUGAUGAUGUGGUACAAUCUCA  | CCUUUUUGUUCCGCGUCAUCAGCU  | Cleavage    |
| gra-miR8675b | Gorai.010G148800 | 1 | 24 | 853  | 876  | AGGUGAUGAUGUGGUACAAUCUCA  | CCCUUUUGUUCCACCUCAUCAGCU  | Translation |
| gra-miR8675b | Gorai.002G115800 | 1 | 24 | 2724 | 2747 | AGGUGAUGAUGUGGUACAAUCUCA  | CUUGCAAGUUUCACAUCAUCAUUU  | Cleavage    |
| gra-miR8675b | Gorai.009G174700 | 1 | 24 | 685  | 708  | AGGUGAUGAUGUGGUACAAUCUCA  | CCCUUUUGUUCGACGUCAUCAGCU  | Cleavage    |
| gra-miR8675c | Gorai.010G253900 | 1 | 24 | 715  | 738  | AGGUGAUGAUGUGGUACAAUCUUA  | CCUUUUUGUUCCGCGUCAUCAGCU  | Cleavage    |
| gra-miR8675c | Gorai.010G148800 | 1 | 24 | 853  | 876  | AGGUGAUGAUGUGGUACAAUCUUA  | CCCUUUUGUUCCACCUCAUCAGCU  | Translation |
| gra-miR8675c | Gorai.002G115800 | 1 | 24 | 2724 | 2747 | AGGUGAUGAUGUGGUACAAUCUUA  | CUUGCAAGUUUCACAUCAUCAUUU  | Cleavage    |
| gra-miR8675c | Gorai.009G174700 | 1 | 24 | 685  | 708  | AGGUGAUGAUGUGGUACAAUCUUA  | CCCUUUUGUUCGACGUCAUCAGCU  | Cleavage    |
| gra-miR8676  | Gorai.006G206500 | 1 | 23 | 1604 | 1626 | AAGGUUGAUGGUUAAAUUUGACU   | GACAGUAUUUAACCAUGAAUCUU   | Cleavage    |
| gra-miR8676  | Gorai.005G126000 | 1 | 23 | 2526 | 2548 | AAGGUUGAUGGUUAAAUUUGACU   | UGUUGAACAUAAACCACCAACCUA  | Cleavage    |
| gra-miR8676  | Gorai.008G049200 | 1 | 23 | 2757 | 2779 | AAGGUUGAUGGUUAAAUUUGACU   | AAUUGAUUAUAGCUAUCCACCUU   | Cleavage    |
| gra-miR8676  | Gorai.002G110000 | 1 | 23 | 2936 | 2958 | AAGGUUGAUGGUUAAAUUUGACU   | AAGAAAGAUUGACCAUUGAAUUU   | Cleavage    |
| gra-miR8677  | Gorai.008G049200 | 1 | 21 | 738  | 758  | AAUGAAUCUAGGUUCUCUCUU     | UGGUGAGGAUCUUGAUGCAUU     | Cleavage    |
| gra-miR8678  | Gorai.007G046900 | 1 | 21 | 398  | 418  | AAUUUGGACUGUCACGUAGGA     | CUCUACGUGGCACUCUAAGUG     | Cleavage    |
| gra-miR8678  | Gorai.009G114800 | 1 | 21 | 1838 | 1858 | AAUUUGGACUGUCACGUAGGA     | AGGUAUGUGACAGUUUGGGUG     | Cleavage    |
| gra-miR8678  | Gorai.001G185100 | 1 | 21 | 3144 | 3164 | AAUUUGGACUGUCACGUAGGA     | GGCUAGGUGGUGGUAUGAAUU     | Cleavage    |
| gra-miR8681  | Gorai.004G225000 | 1 | 22 | 2897 | 2918 | ACAUUGUUGAGGGGUCUAAUCGG   | AGGAUGAGACCUUCAGUGAUGC    | Cleavage    |
| gra-miR8681  | Gorai.001G185100 | 1 | 22 | 2924 | 2945 | ACAUUGUUGAGGGGUCUAAUCGG   | AGGAUGAGUCCUUCAGUGAUGC    | Cleavage    |
| gra-miR8681  | Gorai.004G109400 | 1 | 22 | 393  | 413  | ACAUUGUUGAGGGGUCUAAUCGG   | GGAAUUAG-CUCUCAGAGAUGU    | Cleavage    |
| gra-miR8683  | Gorai.007G184900 | 1 | 24 | 571  | 594  | AGAACUCAUAACACAUUUAGAUAA  | AGCGAUGAAUGUGUUGGGAGUGCC  | Cleavage    |
| gra-miR8683  | Gorai.005G035500 | 1 | 24 | 1255 | 1278 | AGAACUCAUAACACAUUUAGAUAA  | AUCAAUAGAUUUGUUAUGGGAACU  | Cleavage    |

|              |                  |   |    |      |      |                           |                           |             |
|--------------|------------------|---|----|------|------|---------------------------|---------------------------|-------------|
| gra-miR8687  | Gorai.005G259100 | 1 | 24 | 815  | 838  | AGAGACAAAAGAAACACGUUCUAC  | CGACCUCGGGUUCCUUUUGUUUCG  | Cleavage    |
| gra-miR8688  | Gorai.002G110000 | 1 | 24 | 2380 | 2403 | AGAGGAUGCUUUUAUAAAACUCAUA | GCAAUGCUUUCUGAGGAAUCCUCU  | Cleavage    |
| gra-miR8689  | Gorai.013G236600 | 1 | 24 | 810  | 833  | AGAGGUGCUCAUGGGCUGGGUCGG  | AUUUCCUAGCUCGAGAGCAGUUCU  | Translation |
| gra-miR8689  | Gorai.003G002500 | 1 | 24 | 194  | 217  | AGAGGUGCUCAUGGGCUGGGUCGG  | GGGUACCAGCCCACGAGCUUUUCG  | Translation |
| gra-miR8689  | Gorai.007G067100 | 1 | 23 | 1    | 23   | AGAGGUGCUCAUGGGCUGGGUCG   | AUGACCAGCCAAUCGGUGUCUCU   | Translation |
| gra-miR8689  | Gorai.006G007000 | 1 | 24 | 1491 | 1514 | AGAGGUGCUCAUGGGCUGGGUCGG  | GAGAAGCAGCGCAGGGGUACCUUU  | Translation |
| gra-miR8693  | Gorai.007G309200 | 1 | 24 | 276  | 299  | AGGAUGAAAAUAUUGAUGUAGCAU  | CACCACUGUCGAUGUGUUUAUCCU  | Cleavage    |
| gra-miR8694a | Gorai.006G266700 | 1 | 24 | 1112 | 1135 | AGGAUGCACUGUCAGCAAAAGUAU  | UAAUUUUUCUUGACAGUGUUUCUU  | Cleavage    |
| gra-miR8694a | Gorai.005G013500 | 1 | 24 | 1427 | 1450 | AGGAUGCACUGUCAGCAAAAGUAU  | AGUCGGUUGCUGGUGCUGCAUCUU  | Cleavage    |
| gra-miR8694b | Gorai.006G266700 | 1 | 24 | 1112 | 1135 | AGGAUGCACUGUCAGCAAAAGUAU  | UAAUUUUUCUUGACAGUGUUUCUU  | Cleavage    |
| gra-miR8694b | Gorai.005G013500 | 1 | 24 | 1427 | 1450 | AGGAUGCACUGUCAGCAAAAGUAU  | AGUCGGUUGCUGGUGCUGCAUCUU  | Cleavage    |
| gra-miR8695  | Gorai.005G133400 | 1 | 21 | 534  | 554  | AGGAUGUAAAAAGAAUAGGUGA    | AAAUUCUAUUUUAUUUAUUUUU    | Translation |
| gra-miR8695  | Gorai.012G016100 | 1 | 21 | 330  | 350  | AGGAUGUAAAAAGAAUAGGUGA    | AAAUUCUAUUUUAUUUAUUUUU    | Translation |
| gra-miR8698  | Gorai.013G149700 | 1 | 24 | 1577 | 1600 | AGGGACAAUUAACUUUAACGGUCA  | AAAUUGGCUAAACUUAAUUGGUCUU | Cleavage    |
| gra-miR8699  | Gorai.004G198100 | 1 | 24 | 887  | 910  | AGGGCCAUUUUGACAAAACAUGCA  | AAUAUGGUCUUUCAAGAUGGCCCC  | Cleavage    |
| gra-miR8699  | Gorai.005G013500 | 1 | 24 | 1010 | 1033 | AGGGCCAUUUUGACAAAACAUGCA  | AACACGGUAUCUCAAGAUGGCCGU  | Cleavage    |
| gra-miR8702  | Gorai.002G110000 | 1 | 24 | 1702 | 1725 | AGGUAAUUGUCUCUGGGGAAGGGUU | GUUUUAUUAUUCAGAAAGAAUACCU | Translation |
| gra-miR8702  | Gorai.005G035500 | 1 | 24 | 2006 | 2029 | AGGUAAUUGUCUCUGGGGAAGGGUU | CUAAUUUGACCACAGACAGUGCUU  | Cleavage    |
| gra-miR8704  | Gorai.002G103800 | 1 | 24 | 1063 | 1086 | AGUCAGUUCAGGCAGUCAGACCGU  | GAUGAUUGGCUGUUUGAGUUUGCU  | Cleavage    |
| gra-miR8706a | Gorai.006G206500 | 1 | 24 | 2263 | 2286 | AGUUUUAGGAUUGAUUUUGAUGAAA | CUGUGCCAAGGUAAUCCUGAAAUU  | Cleavage    |
| gra-miR8706a | Gorai.009G187500 | 1 | 24 | 936  | 959  | AGUUUUAGGAUUGAUUUUGAUGAAA | UGAGAUCAAAGAAGUUCUAAAACG  | Cleavage    |
| gra-miR8706a | Gorai.013G236600 | 1 | 24 | 1500 | 1524 | AGUUUUAGGAUUGAU-UUGAUGAAA | UAGCAACAAUGUUAAUCUUGAAACU | Cleavage    |
| gra-miR8706b | Gorai.006G206500 | 1 | 24 | 2263 | 2286 | AGUUUUAGGAUUGAUUUUGAUGAAA | CUGUGCCAAGGUAAUCCUGAAAUU  | Cleavage    |
| gra-miR8706b | Gorai.009G187500 | 1 | 24 | 936  | 959  | AGUUUUAGGAUUGAUUUUGAUGAAA | UGAGAUCAAAGAAGUUCUAAAACG  | Cleavage    |
| gra-miR8706b | Gorai.013G236600 | 1 | 24 | 1500 | 1524 | AGUUUUAGGAUUGAU-UUGAUGAAA | UAGCAACAAUGUUAAUCUUGAAACU | Cleavage    |
| gra-miR8707  | Gorai.013G236600 | 1 | 24 | 537  | 560  | AUAAAAACUUUUGAAUAAUUCAGU  | UCCUAGUGCUUCAAAAGUUGUUAA  | Cleavage    |
| gra-miR8707  | Gorai.006G266900 | 1 | 24 | 142  | 165  | AUAAAAACUUUUGAAUAAUUCAGU  | GCGCCAUUGAUGAACAGUUUUUGU  | Translation |
| gra-miR8708  | Gorai.007G309200 | 1 | 23 | 2156 | 2178 | AGGAGGAGUUAUGGAUAGUUUUU   | CUCUAGUGACUGUAACUCCUCCU   | Cleavage    |
| gra-miR8708  | Gorai.006G266700 | 1 | 23 | 2100 | 2124 | AGGAGGAGUUAUGG--AUAGUUUUU | UGUAGCUGUAACUGUAACUCCUCCU | Cleavage    |
| gra-miR8709a | Gorai.010G253900 | 1 | 24 | 105  | 128  | AUAUUAAAAACUAUACAUGAACUUU | ACGGUUC AUGUGUAGUUUCGGUGG | Cleavage    |
| gra-miR8709a | Gorai.001G185100 | 1 | 24 | 1065 | 1088 | AUAUUAAAAACUAUACAUGAACUUU | GGACACUAUGGGUGGUUUUAUUGC  | Cleavage    |
| gra-miR8709b | Gorai.007G067100 | 1 | 24 | 1418 | 1441 | UCAUGUAUAAUUUUGAGAUUUGUC  | UAAAGGUUUUAAGAUGUAUCUGG   | Cleavage    |
| gra-miR8709c | Gorai.012G145600 | 1 | 20 | 119  | 138  | AUACAUGAACUUCGAUUUUA      | AUAAGGCUAAGUUUAUGUGC      | Cleavage    |
| gra-miR8712  | Gorai.006G266700 | 1 | 24 | 843  | 866  | AUAUCAUUGGUGAUGUAUCGUCUU  | GCCAAAAGAUAAUGCCGAUGAUAU  | Cleavage    |
| gra-miR8712  | Gorai.009G114800 | 1 | 24 | 837  | 860  | AUAUCAUUGGUGAUGUAUCGUCUU  | ACCGAGAGAAAUAUUAAUGAAAU   | Cleavage    |
| gra-miR8717  | Gorai.009G114800 | 1 | 24 | 1764 | 1787 | AUUGGUUGUUCUGAUUCGAGGCUA  | GGAGUUCAAAUAAGAACAAUAU    | Cleavage    |
| gra-miR8717  | Gorai.010G056300 | 1 | 24 | 2283 | 2306 | AUUGGUUGUUCUGAUUCGAGGCUA  | CACUCAUGCUUUAGAACAGCCAGU  | Cleavage    |
| gra-miR8718  | Gorai.002G110000 | 1 | 21 | 2966 | 2986 | AUUUUGGAAGAAUUUCAGCUG     | AAGCUGACAUUCUCUCAAAC      | Cleavage    |
| gra-miR8718  | Gorai.008G049200 | 1 | 21 | 3230 | 3250 | AUUUUGGAAGAAUUUCAGCUG     | AAGCUGACAUCCUUUCAAGC      | Translation |
| gra-miR8718  | Gorai.013G209900 | 1 | 21 | 859  | 879  | AUUUUGGAAGAAUUUCAGCUG     | AAGUUGAAAAUUUUUCCAGAU     | Cleavage    |
| gra-miR8718  | Gorai.003G115800 | 1 | 21 | 608  | 628  | AUUUUGGAAGAAUUUCAGCUG     | CAACUGGUGUUUACCAAAAU      | Cleavage    |
| gra-miR8718  | Gorai.003G002500 | 1 | 21 | 617  | 637  | AUUUUGGAAGAAUUUCAGCUG     | CUCUUGAAGAUUCUUGCAAAAU    | Cleavage    |
| gra-miR8718  | Gorai.007G067100 | 1 | 21 | 36   | 56   | AUUUUGGAAGAAUUUCAGCUG     | CCGCCGAAUUCUUAUAGAAG      | Cleavage    |
| gra-miR8720  | Gorai.001G058100 | 1 | 24 | 1455 | 1478 | CAGUGUAGUUCUAAACCCGUCGGG  | UUUGAAGGGUUUAAGAUUACAUUU  | Translation |
| gra-miR8720  | Gorai.003G120400 | 1 | 24 | 1473 | 1496 | CAGUGUAGUUCUAAACCCGUCGGG  | UUGGAAGGGUUUGAAACUGCAUUU  | Translation |
| gra-miR8721a | Gorai.003G115800 | 1 | 21 | 53   | 73   | CAUCGAUAGUUUGAGGAUGUA     | UCAAUGCUCGAAUUGUUGAUG     | Cleavage    |

|              |                  |   |    |      |      |                           |                           |             |
|--------------|------------------|---|----|------|------|---------------------------|---------------------------|-------------|
| gra-miR8721a | Gorai.002G218300 | 1 | 21 | 768  | 788  | CAUCGAUAGUUUGAGGAUGUA     | AACAUCCCCAGAUUAUCGGAC     | Cleavage    |
| gra-miR8721a | Gorai.009G278600 | 1 | 21 | 536  | 556  | CAUCGAUAGUUUGAGGAUGUA     | UGCAGGUUCAGAAUAUUGAUG     | Cleavage    |
| gra-miR8721a | Gorai.012G040100 | 1 | 21 | 554  | 574  | CAUCGAUAGUUUGAGGAUGUA     | ACAAGCAUCAAAACUAUUGAAG    | Cleavage    |
| gra-miR8721b | Gorai.003G115800 | 1 | 21 | 53   | 73   | CAUCGAUAGUUUGAGGAUGUA     | UCAAUGCUCGAAUUGUUGAUG     | Cleavage    |
| gra-miR8721b | Gorai.002G218300 | 1 | 21 | 768  | 788  | CAUCGAUAGUUUGAGGAUGUA     | AACAUCCCCAGAUUAUCGGAC     | Cleavage    |
| gra-miR8721b | Gorai.009G278600 | 1 | 21 | 536  | 556  | CAUCGAUAGUUUGAGGAUGUA     | UGCAGGUUCAGAAUAUUGAUG     | Cleavage    |
| gra-miR8721b | Gorai.012G040100 | 1 | 21 | 554  | 574  | CAUCGAUAGUUUGAGGAUGUA     | ACAAGCAUCAAAACUAUUGAAG    | Cleavage    |
| gra-miR8722  | Gorai.009G006600 | 1 | 22 | 2158 | 2179 | CAUGUUUUUCCUGUUCAUCUUC    | GGUGAUGACCAGGC AAAACAUG   | Cleavage    |
| gra-miR8722  | Gorai.004G101000 | 1 | 22 | 2248 | 2269 | CAUGUUUUUCCUGUUCAUCUUC    | GAUGGUGAGCAGGC AAAACCUG   | Cleavage    |
| gra-miR8722  | Gorai.008G049200 | 1 | 22 | 28   | 49   | CAUGUUUUUCCUGUUCAUCUUC    | AUGGAUCAACAGAAGAACCAUG    | Translation |
| gra-miR8722  | Gorai.005G126000 | 1 | 22 | 1720 | 1741 | CAUGUUUUUCCUGUUCAUCUUC    | AGUGAUGGGAAGGAAAAGGAUG    | Cleavage    |
| gra-miR8722  | Gorai.004G109400 | 1 | 22 | 660  | 681  | CAUGUUUUUCCUGUUCAUCUUC    | GAAGAAGAACAAGAAAAAGAUC    | Translation |
| gra-miR8723a | Gorai.009G278600 | 1 | 23 | 336  | 357  | UGUAAACAGUAAGCUGACGUGACA  | UGACGCGUU-GAUUACUGUUACG   | Cleavage    |
| gra-miR8723a | Gorai.001G185100 | 1 | 23 | 1626 | 1649 | UGU-AAACAGUAAGCUGACGUGACA | AGGGAGGUCUGCUUACUGUUCACA  | Cleavage    |
| gra-miR8723b | Gorai.004G108400 | 1 | 24 | 504  | 527  | CCAUA AACGGUGUAACAGUAAGCU | UGCUGGCCGUAACA UUGUUGAUGG | Cleavage    |
| gra-miR8723b | Gorai.006G266700 | 1 | 24 | 267  | 290  | CCAUA AACGGUGUAACAGUAAGCU | AGGCGACUCUCUCACCGUUGAUGU  | Cleavage    |
| gra-miR8726  | Gorai.004G109400 | 1 | 21 | 509  | 529  | CGAUGGAGUCUGGAGACAAAA     | AAUUGCCUCUAGAGUCCGUUG     | Cleavage    |
| gra-miR8726  | Gorai.009G348900 | 1 | 21 | 1202 | 1225 | CGAUGGAGUCUGGAGAAA        | AUUUGGCUUCUCCAGAUUCCAUCU  | Cleavage    |
| gra-miR8726  | Gorai.007G046900 | 1 | 21 | 328  | 348  | CGAUGGAGUCUGGAGACAAAA     | CCGUCUUUUCAGCCUCCAUCG     | Cleavage    |
| gra-miR8728  | Gorai.004G225000 | 1 | 24 | 578  | 601  | CGGGCUUGGGCAAAA UUUUAGGCU | GUGGAAAAAU AUUGCCAGGCCUA  | Cleavage    |
| gra-miR8728  | Gorai.002G218300 | 1 | 24 | 83   | 106  | CGGGCUUGGGCAAAA UUUUAGGCU | GCGGGAAAAU AUUGCCAGACCUG  | Cleavage    |
| gra-miR8728  | Gorai.001G185100 | 1 | 24 | 566  | 589  | CGGGCUUGGGCAAAA UUUUAGGCU | GUGGAAAAAU AUUGCCUAGGCCAA | Cleavage    |
| gra-miR8728  | Gorai.002G115800 | 1 | 24 | 836  | 859  | CGGGCUUGGGCAAAA UUUUAGGCU | AAAUCAAGAUUCAGCCUGAGCUCG  | Cleavage    |
| gra-miR8730  | Gorai.010G056300 | 1 | 24 | 1433 | 1456 | CUAAGAGAUUGGGAUUUGGUAGGA  | AGUUCUCAAAUCCUAAGU UCCUGG | Cleavage    |
| gra-miR8730  | Gorai.009G226800 | 1 | 24 | 581  | 604  | CUAAGAGAUUGGGAUUUGGUAGGA  | UGGCGGCAAAUCCCGAUUUUCUAU  | Cleavage    |
| gra-miR8731  | Gorai.006G266700 | 1 | 21 | 1046 | 1066 | CUAUA AACAGUCGAUGGUAUC    | GCUUCCAUCGACUGUUUGUCU     | Cleavage    |
| gra-miR8731  | Gorai.005G072800 | 1 | 21 | 656  | 676  | CUAUA AACAGUCGAUGGUAUC    | GGUGUCCUUGGUUCUUUAUAG     | Cleavage    |
| gra-miR8733  | Gorai.007G309200 | 1 | 21 | 956  | 976  | GAGCUUGGAAGUGCAUCCGGC     | AACUGAACUACUUUCAGGCUU     | Cleavage    |
| gra-miR8734  | Gorai.009G012400 | 1 | 24 | 1403 | 1426 | GAUCAUAUCUCGUACGUUAGGACA  | CACCGCAGCAAGUGAGAUUGAUU   | Cleavage    |
| gra-miR8735  | Gorai.009G006600 | 1 | 24 | 2300 | 2322 | GGGGACAAUACCUUCGAUUGUUGG  | CCAA-AGUUGAAGGCGUUGCCCC   | Translation |
| gra-miR8735  | Gorai.009G012400 | 1 | 24 | 3562 | 3585 | GGGGACAAUACCUUCGAUUGUUGG  | GUGGCAUUCUAUGGUGUUGUUCUC  | Cleavage    |
| gra-miR8736  | Gorai.005G126000 | 1 | 24 | 244  | 267  | GUGGAACGUGUUAAGAGAGGAAUA  | UAUACCUCUUUUGACACGUUACAU  | Cleavage    |
| gra-miR8736  | Gorai.003G115800 | 1 | 24 | 1036 | 1059 | GUGGAACGUGUUAAGAGAGGAAUA  | AAUGUCUUGUUUGGUACA UUCCAC | Cleavage    |
| gra-miR8737  | Gorai.004G108400 | 1 | 24 | 1764 | 1787 | GUGUAUCUCCUGAAAACGACGACA  | ACCUGGUGGUUUUAGGAUGUACAC  | Cleavage    |
| gra-miR8738a | Gorai.009G059900 | 1 | 23 | 1004 | 1026 | GUUAACUUUAACGGUCAACGGUU   | GGUUCUUUGUUGUUGAAGUUAGU   | Cleavage    |
| gra-miR8738b | Gorai.009G059900 | 1 | 23 | 1004 | 1026 | GUUAACUUUAACGGUCAACGGUU   | GGUUCUUUGUUGUUGAAGUUAGU   | Cleavage    |
| gra-miR8739  | Gorai.005G035500 | 1 | 24 | 1958 | 1981 | UAACUAAAUAUGACACGUGGCAU   | CUGUUACACCUCACAAUUUAGUUG  | Translation |
| gra-miR8742a | Gorai.005G072800 | 1 | 21 | 700  | 720  | UAUCUUAUUCAUUCUUGGACUG    | UUGUUCAGGAUUAAGAAGAUG     | Translation |
| gra-miR8742a | Gorai.006G206500 | 1 | 21 | 2066 | 2086 | UAUCUUAUUCAUUCUUGGACUG    | AGCCUCAAGGUGAAAAAGAUG     | Cleavage    |
| gra-miR8742a | Gorai.004G109400 | 1 | 21 | 2143 | 2163 | UAUCUUAUUCAUUCUUGGACUG    | GGGUUUAAGAUUGACGAGAUUA    | Translation |
| gra-miR8742a | Gorai.013G214100 | 1 | 21 | 2035 | 2055 | UAUCUUAUUCAUUCUUGGACUG    | GGAUUCAAGAUUGAUGAGAUU     | Translation |
| gra-miR8742a | Gorai.008G160900 | 1 | 21 | 151  | 171  | UAUCUUAUUCAUUCUUGGACUG    | UCGUUGAAGAUUGGGGGAGAUG    | Cleavage    |
| gra-miR8742b | Gorai.005G072800 | 1 | 21 | 700  | 720  | UAUCUUAUUCAUUCUUGGACUG    | UUGUUCAGGAUUAAGAAGAUG     | Translation |
| gra-miR8742b | Gorai.006G206500 | 1 | 21 | 2066 | 2086 | UAUCUUAUUCAUUCUUGGACUG    | AGCCUCAAGGUGAAAAAGAUG     | Cleavage    |
| gra-miR8742b | Gorai.004G109400 | 1 | 21 | 2143 | 2163 | UAUCUUAUUCAUUCUUGGACUG    | GGGUUUAAGAUUGACGAGAUUA    | Translation |
| gra-miR8742b | Gorai.013G214100 | 1 | 21 | 2035 | 2055 | UAUCUUAUUCAUUCUUGGACUG    | GGAUUCAAGAUUGAUGAGAUU     | Translation |

|              |                  |   |    |      |      |                            |                           |             |
|--------------|------------------|---|----|------|------|----------------------------|---------------------------|-------------|
| gra-miR8742b | Gorai.008G160900 | 1 | 21 | 151  | 171  | UAUCUUAAUUAUCUUGGACUG      | UCGUUGAAGAUGGGGGAGAUG     | Cleavage    |
| gra-miR8743b | Gorai.007G184900 | 1 | 24 | 602  | 625  | UUUGGAAAAGUUAAAAUUGGUCAU   | AUGUGCAGUCUGGAACUUUUCAAG  | Cleavage    |
| gra-miR8745  | Gorai.004G109400 | 1 | 21 | 510  | 530  | UCAACGGAGUUGGGAGACAAA      | AUUGCCUCUAGAGUCCGUUGA     | Cleavage    |
| gra-miR8746  | Gorai.001G185100 | 1 | 21 | 371  | 390  | UCCAUAUUUCACUAUCUCUUA      | AGAAAGAUGGUGAAAU-UGGA     | Cleavage    |
| gra-miR8746  | Gorai.004G225000 | 1 | 21 | 332  | 351  | UCCAUAUUUCACUAUCUCUUA      | UUAGAGAGAGUGAAA-AUGGG     | Cleavage    |
| gra-miR8746  | Gorai.004G101000 | 1 | 21 | 962  | 982  | UCCAUAUUUCACUAUCUCUUA      | UUUCAGAUAAUGUAAUAUGGA     | Cleavage    |
| gra-miR8748  | Gorai.007G046900 | 1 | 24 | 818  | 841  | UCGGUGGAGAUGGAUAAAAUGAAU   | UGGCUUCUGAACCAUCUUCAUCGA  | Cleavage    |
| gra-miR8748  | Gorai.001G185100 | 1 | 24 | 738  | 761  | UCGGUGGAGAUGGAUAAAAUGAAU   | UGCCCUUAUAUCUGUUUCUUCUGA  | Cleavage    |
| gra-miR8748  | Gorai.004G225000 | 1 | 24 | 750  | 773  | UCGGUGGAGAUGGAUAAAAUGAAU   | UGCCCUUAUAUCUGUUUCUUCUGA  | Cleavage    |
| gra-miR8748  | Gorai.003G115800 | 1 | 24 | 782  | 805  | UCGGUGGAGAUGGAUAAAAUGAAU   | UGCCCUUCUGGACCAUCUGCACCGA | Cleavage    |
| gra-miR8750  | Gorai.013G236600 | 1 | 24 | 211  | 234  | UCUUAGUUGGCAUAUACUCAAGGA   | CACAUGGAUGUAUGCCAUCUAAGG  | Cleavage    |
| gra-miR8750  | Gorai.002G110000 | 1 | 24 | 494  | 517  | UCUUAGUUGGCAUAUACUCAAGGA   | GACUUCUAUAUAUGUCAAUUGGGA  | Cleavage    |
| gra-miR8750  | Gorai.006G266700 | 1 | 24 | 464  | 487  | UCUUAGUUGGCAUAUACUCAAGGA   | CUAUAGACUGUAUGCCUAUUAAUA  | Cleavage    |
| gra-miR8751a | Gorai.002G115800 | 1 | 24 | 2713 | 2736 | UGAAAAUUUGUAGAGACAAAACGCU  | AUUAAGUUGUCCUUGCAAGUUUCA  | Cleavage    |
| gra-miR8751a | Gorai.001G185100 | 1 | 24 | 1700 | 1723 | UGAAAAUUUGUAGAGACAAAACGCU  | CUUCCCUUGUUUUUCAAAUUGCA   | Translation |
| gra-miR8751a | Gorai.013G214100 | 1 | 24 | 331  | 354  | UGAAAAUUUGUAGAGACAAAACGCU  | UGUAAUUUGGCUCUGGAGGUUUCU  | Cleavage    |
| gra-miR8751a | Gorai.009G059900 | 1 | 24 | 328  | 351  | UGAAAAUUUGUAGAGACAAAACGCU  | UGUAAUUUGGCUUUAGAGGUUUCU  | Cleavage    |
| gra-miR8751b | Gorai.005G072800 | 1 | 24 | 1053 | 1076 | UGAAAAUUUGUAGAGAGAUAAACGCU | CCAUGCAUCGCUCUACGGAUUCCA  | Cleavage    |
| gra-miR8755  | Gorai.002G206700 | 1 | 24 | 2608 | 2631 | UGGACGCGCUUUGCUGACGUGGCA   | GAAGAUGUCAGCAGAAUGUGUCUC  | Cleavage    |
| gra-miR8756  | Gorai.002G115800 | 1 | 24 | 2254 | 2278 | UGGAC-UGUUAAAAUUUUAAUGGCA  | AGACCUCAAAUUUUAAACAUUCUG  | Cleavage    |
| gra-miR8757b | Gorai.013G236600 | 1 | 23 | 1839 | 1861 | UGGGUCGAGCUUAGGCAAGCAUA    | UGAACUUGCUGGAGCUUCACCUA   | Cleavage    |
| gra-miR8758  | Gorai.002G115800 | 1 | 24 | 1846 | 1869 | UGGGCUUCUUGCAAGAUGAAGGUA   | CGCCAAUAUUUUGCUGGAAGCCUA  | Translation |
| gra-miR8758  | Gorai.003G074300 | 1 | 24 | 1780 | 1803 | UGGGCUUCUUGCAAGAUGAAGGUA   | CAACAGUAUUUUGCAGGGAGUCUC  | Cleavage    |
| gra-miR8758  | Gorai.006G206500 | 1 | 24 | 1762 | 1785 | UGGGCUUCUUGCAAGAUGAAGGUA   | CAACAGUAUUUUGCAGGGAGUCUC  | Cleavage    |
| gra-miR8759  | Gorai.010G148800 | 1 | 21 | 1140 | 1160 | UGGUGGAAGUAUUGUGCCCGG      | CCGGCCACAGUAUGUCCAGCA     | Cleavage    |
| gra-miR8759  | Gorai.004G131700 | 1 | 21 | 236  | 256  | UGGUGGAAGUAUUGUGCCCGG      | CUGGUUACAAUCUUUUCGUCA     | Translation |
| gra-miR8759  | Gorai.004G101000 | 1 | 21 | 710  | 729  | UGGUGGAAGUAUUGUGCCCGG      | CCGGGCA-ACUACUGCCACCA     | Cleavage    |
| gra-miR8759  | Gorai.008G049200 | 1 | 21 | 2285 | 2305 | UGGUGGAAGUAUUGUGCCCGG      | CAGGGCAAAGAACUUCUGUUA     | Translation |
| gra-miR8760  | Gorai.009G226800 | 1 | 24 | 639  | 662  | UGUGACAUCGUCAAAUUCGGCCAU   | UCCUCCGGUUGUGACGGUGGCACA  | Cleavage    |
| gra-miR8760  | Gorai.004G225000 | 1 | 24 | 2857 | 2880 | UGUGACAUCGUCAAAUUCGGCCAU   | GAAUCUGAGUUUGAGGAUGCUGCA  | Translation |
| gra-miR8761  | Gorai.002G103800 | 1 | 24 | 1318 | 1341 | UGUUGACGUUGCAUACAUGUGGAU   | GCUAGCAAGGAGGUAAUGUCAGCA  | Cleavage    |
| gra-miR8761  | Gorai.007G067100 | 1 | 24 | 1114 | 1137 | UGUUGACGUUGCAUACAUGUGGAU   | AGUGAAAUGUCUGCAAUCUUGACA  | Cleavage    |
| gra-miR8762a | Gorai.001G185100 | 1 | 24 | 3630 | 3653 | UUAACAUUUGUUAACUUUGCUGAC   | GGCACCAGAGUUUUAAAAUGGUAA  | Translation |
| gra-miR8762a | Gorai.003G115800 | 1 | 24 | 618  | 641  | UUAACAUUUGUUAACUUUGCUGAC   | UUUACCAAAAUUUACAGCUGUUGA  | Cleavage    |
| gra-miR8762b | Gorai.001G185100 | 1 | 24 | 3630 | 3653 | UUAACGUUUUGUUAACUUUGUUGAU  | GGCACCAGAGUUUUAAAAUGGUAA  | Translation |
| gra-miR8762c | Gorai.001G185100 | 1 | 24 | 3630 | 3653 | UUAACGUUUUGUUAACUUUGUUGAU  | GGCACCAGAGUUUUAAAAUGGUAA  | Translation |
| gra-miR8762d | Gorai.013G214100 | 1 | 24 | 711  | 734  | UUGUUAACUUUGAUGAUGUGGCAU   | GGUUAACGUUGACAAAGUUAUGA   | Cleavage    |
| gra-miR8762d | Gorai.003G074300 | 1 | 24 | 1887 | 1910 | UUGUUAACUUUGAUGAUGUGGCAU   | UCGUAAAGAUCAACAAAGUUAACCG | Cleavage    |
| gra-miR8762d | Gorai.009G114800 | 1 | 24 | 1779 | 1802 | UUGUUAACUUUGAUGAUGUGGCAU   | ACAACAUAUUCUUAAGCUAACAU   | Cleavage    |
| gra-miR8762d | Gorai.009G114800 | 1 | 24 | 1571 | 1593 | UUGUUAACUUUGAUGAUGUGGCAU   | AUGC-ACUUUUUCAAGGUUCACGA  | Cleavage    |
| gra-miR8762e | Gorai.002G206700 | 1 | 24 | 2514 | 2537 | UUUUUAACUUUACUGACAUGGCAU   | AGCAACGUUCGGUGAAGUUAAAAU  | Cleavage    |
| gra-miR8762e | Gorai.004G109400 | 1 | 24 | 765  | 788  | UUUUUAACUUUACUGACAUGGCAU   | GAAGAAGAUCAUAAAGCUAAAGA   | Cleavage    |
| gra-miR8762e | Gorai.005G126000 | 1 | 24 | 768  | 791  | UUUUUAACUUUACUGACAUGGCAU   | AAUCCAUUACAGUAAGGUUGAGUA  | Cleavage    |
| gra-miR8762e | Gorai.009G278600 | 1 | 24 | 198  | 221  | UUUUUAACUUUACUGACAUGGCAU   | UGC UUAUGUCGGUGGAGAUACGAA | Cleavage    |
| gra-miR8762e | Gorai.002G103800 | 1 | 24 | 1586 | 1609 | UUUUUAACUUUACUGACAUGGCAU   | CAGAAAUGUGGGAGAAGUUGGAAG  | Cleavage    |
| gra-miR8762e | Gorai.004G101000 | 1 | 24 | 2112 | 2134 | UUUUUAACUUUACUGACAUGGCAU   | AAAUAAUG-CAGUGAAGGUGGAAA  | Cleavage    |



|              |                  |   |    |      |      |                           |                           |             |
|--------------|------------------|---|----|------|------|---------------------------|---------------------------|-------------|
| gra-miR8763  | Gorai.006G266700 | 1 | 23 | 542  | 563  | UUAAUACUGUUAUUUGUUGGU     | ACCAA-AGAUUUAAUAGUUUUA    | Cleavage    |
| gra-miR8763  | Gorai.006G266900 | 1 | 23 | 378  | 400  | UUAAUACUGUUAUUUGUUGGU     | UAAGGUAGGGUUAACAUUAUUGA   | Cleavage    |
| gra-miR8766  | Gorai.005G072800 | 1 | 24 | 1059 | 1082 | UUUUUUUGGAAUUAGAAAAGUCGU  | AUCGCUCUACGGAUUCCAGAAUGG  | Cleavage    |
| gra-miR8767c | Gorai.003G120400 | 1 | 21 | 1468 | 1488 | UUUUCAACUCUGCCAAGCAAU     | GUUGGUUGGAAGGGUUUGAAA     | Cleavage    |
| gra-miR8767c | Gorai.007G043100 | 1 | 21 | 1423 | 1443 | UUUUCAACUCUGCCAAGCAAU     | CUUGGUUGGAAGGGUUUGAAA     | Cleavage    |
| gra-miR8768  | Gorai.009G174700 | 1 | 21 | 151  | 171  | UUCCAUGUCACAGAGAUGUUG     | AAUCAGCUCUGUACAUGGGC      | Cleavage    |
| gra-miR8769  | Gorai.009G012400 | 1 | 24 | 482  | 505  | UUGAACUUUGACCGGAUCUAGGGA  | CAACAGGUUUUGGACAGAGUUCAA  | Translation |
| gra-miR8769  | Gorai.009G012400 | 1 | 24 | 2668 | 2691 | UUGAACUUUGACCGGAUCUAGGGA  | AACUUGGAUUCCCUUGAAGUUCAA  | Cleavage    |
| gra-miR8770  | Gorai.001G068000 | 1 | 24 | 398  | 421  | UUGAUGGUGGUAAAGAAUGUGCAU  | AUGAUCGUUUAAUAGCACCAUCAG  | Translation |
| gra-miR8771a | Gorai.004G109400 | 1 | 21 | 1518 | 1538 | GGAUUGUCGUUAGGGAGGUAA     | AUACUUCCCUGAAGAUGGUUC     | Cleavage    |
| gra-miR8771a | Gorai.012G040100 | 1 | 21 | 582  | 602  | GGAUUGUCGUUAGGGAGGUAA     | UUACAUGGCUAAUGACAAACC     | Cleavage    |
| gra-miR8771a | Gorai.005G259100 | 1 | 21 | 1740 | 1760 | GGAUUGUCGUUAGGGAGGUAA     | AAACUUUUCUAAACAACGUUCC    | Cleavage    |
| gra-miR8771a | Gorai.009G012400 | 1 | 21 | 834  | 854  | GGAUUGUCGUUAGGGAGGUAA     | CCAGCUUCCUGAUGAGGAUCU     | Cleavage    |
| gra-miR8771b | Gorai.004G109400 | 1 | 21 | 1518 | 1538 | GGAUUGUCGUUAGGGAGGUAA     | AUACUUCCCUGAAGAUGGUUC     | Cleavage    |
| gra-miR8771b | Gorai.012G040100 | 1 | 21 | 582  | 602  | GGAUUGUCGUUAGGGAGGUAA     | UUACAUGGCUAAUGACAAACC     | Cleavage    |
| gra-miR8771b | Gorai.005G259100 | 1 | 21 | 1740 | 1760 | GGAUUGUCGUUAGGGAGGUAA     | AAACUUUUCUAAACAACGUUCC    | Cleavage    |
| gra-miR8771b | Gorai.009G012400 | 1 | 21 | 834  | 854  | GGAUUGUCGUUAGGGAGGUAA     | CCAGCUUCCUGAUGAGGAUCU     | Cleavage    |
| gra-miR8771c | Gorai.003G002500 | 1 | 24 | 482  | 505  | UAGGGAGGUAAACGAAGCUUACGG  | AUCAGGAUCUUAAUUGCCUCCCUA  | Cleavage    |
| gra-miR8771d | Gorai.002G110000 | 1 | 21 | 1798 | 1818 | UGCCAUGUAGGAUUGUCGUUA     | CAUCCACAAUCUGAUUAGGCA     | Cleavage    |
| gra-miR8771d | Gorai.004G225000 | 1 | 21 | 1940 | 1960 | UGCCAUGUAGGAUUGUCGUUA     | AUACUACAAUCUUGGAUGCCA     | Cleavage    |
| gra-miR8771e | Gorai.007G184900 | 1 | 24 | 571  | 594  | GGCAUUUAAAACACAUUUGGACUG  | AGCGAUGAAUGUGUUGGGAGUGCC  | Cleavage    |
| gra-miR8771f | Gorai.006G007000 | 1 | 23 | 953  | 975  | UUGGACAUCCAAGUUAGCAUUUA   | UUGCUGCUUGUUUGGAUGUUCUG   | Cleavage    |
| gra-miR8771f | Gorai.001G185100 | 1 | 23 | 1973 | 1994 | UUGGACAUCCAAGUUAGCAUUUA   | AUACUGCAAGCUUGGAUG-CCAG   | Cleavage    |
| gra-miR8772  | Gorai.013G236600 | 1 | 21 | 1146 | 1166 | UUGGACUGUGGCUACAUUAG      | UGGU AUGAAGCCAU AUUCCGA   | Cleavage    |
| gra-miR8773  | Gorai.008G049200 | 1 | 23 | 1930 | 1952 | UUGGAUGAACGGUGCGUUUACUU   | GCAGAAAUGAACCGUUUAUCAAA   | Cleavage    |
| gra-miR8773  | Gorai.009G012400 | 1 | 23 | 4096 | 4118 | UUGGAUGAACGGUGCGUUUACUU   | AUGGAGAGGUGCUGGUCAUCCGA   | Cleavage    |
| gra-miR8774  | Gorai.009G006600 | 1 | 24 | 2352 | 2375 | UUGGAUUUUGAUUCAUAGAUUCGU  | AGCUGCCGAUGAAUCAAAAUCAAU  | Cleavage    |
| gra-miR8774  | Gorai.006G206500 | 1 | 24 | 266  | 289  | UUGGAUUUUGAUUCAUAGAUUCGU  | CCAAUUCAGUGAAUGAAAAUCCUA  | Translation |
| gra-miR8774  | Gorai.013G149700 | 1 | 24 | 1730 | 1753 | UUGGAUUUUGAUUCAUAGAUUCGU  | AUGAGUUGAAGGAUCCAAAUCAA   | Cleavage    |
| gra-miR8774  | Gorai.004G225000 | 1 | 24 | 2627 | 2650 | UUGGAUUUUGAUUCAUAGAUUCGU  | UAAGAUCUGUGCAUGGGAAUUCAA  | Translation |
| gra-miR8774  | Gorai.009G226800 | 1 | 24 | 825  | 848  | UUGGAUUUUGAUUCAUAGAUUCGU  | AAAAAU CGAUGAAUCAAAUGCUAG | Cleavage    |
| gra-miR8776a | Gorai.009G006600 | 1 | 24 | 484  | 507  | UUUCAAAAGUCCUUGCAUACUAAUU | AGGAGGUAUGUGGAUGCUUUGAAA  | Translation |
| gra-miR8776b | Gorai.009G006600 | 1 | 24 | 484  | 507  | UUUCAAAAGUCCUUGCAUACUAAUU | AGGAGGUAUGUGGAUGCUUUGAAA  | Translation |
| gra-miR8776c | Gorai.009G006600 | 1 | 24 | 484  | 507  | UUUCAAAAGUCCUUGCAUACUAAUU | AGGAGGUAUGUGGAUGCUUUGAAA  | Translation |
| gra-miR8776d | Gorai.009G006600 | 1 | 24 | 484  | 507  | UUUCAAAAGUCCUUGCAUACUAAUU | AGGAGGUAUGUGGAUGCUUUGAAA  | Translation |
| gra-miR8777  | Gorai.008G049200 | 1 | 20 | 3663 | 3682 | UUUCCAAUAGAAGAAUGACA      | UGGU AUUGUUCU AUGGGAGA    | Cleavage    |
| gra-miR8777  | Gorai.009G059900 | 1 | 20 | 1325 | 1344 | UUUCCAAUAGAAGAAUGACA      | UGGCAUUGUUCAAUUGGGGA      | Cleavage    |
| gra-miR8777  | Gorai.013G214100 | 1 | 20 | 1361 | 1380 | UUUCCAAUAGAAGAAUGACA      | UGGCAUUGUUCAAUUGGGGA      | Cleavage    |
| gra-miR8777  | Gorai.013G149700 | 1 | 20 | 1358 | 1377 | UUUCCAAUAGAAGAAUGACA      | UGGCUUUCUUUAAUUGGGGA      | Cleavage    |
| gra-miR8777  | Gorai.002G103800 | 1 | 20 | 1250 | 1269 | UUUCCAAUAGAAGAAUGACA      | UGGCUUUCUUUAAUUGGGGA      | Cleavage    |
| gra-miR8778  | Gorai.003G115800 | 1 | 24 | 15   | 38   | UUUCCAUUUAGGGUUUGAACUUU   | CGUU AUCAAGGUUAAGUAUGGAAA | Translation |
| gra-miR8778  | Gorai.009G012400 | 1 | 24 | 2676 | 2699 | UUUCCAUUUAGGGUUUGAACUUU   | UUCCCUUGAAGUUCAAUAUGGGAA  | Translation |
| gra-miR8780  | Gorai.010G253900 | 1 | 24 | 715  | 737  | UUUGAUGAUGUGGCAACAAAGCGC  | CCUUUUUGUU-CCGCGUCAUCAGC  | Cleavage    |
| gra-miR8780  | Gorai.006G007000 | 1 | 24 | 657  | 680  | UUUGAUGAUGUGGCAACAAAGCGC  | UGUUGCAGUUGUUUCAUCAUCAGA  | Translation |
| gra-miR8780  | Gorai.010G148800 | 1 | 24 | 853  | 875  | UUUGAUGAUGUGGCAACAAAGCGC  | CCCUUUUGUU-CCACCUCAUCAGC  | Cleavage    |
| gra-miR8780  | Gorai.001G185100 | 1 | 24 | 3203 | 3226 | UUUGAUGAUGUGGCAACAAAGCGC  | UACU AUUAUUGUUAUGUCAUGGAA | Cleavage    |

|              |                  |   |    |      |      |                          |                           |             |
|--------------|------------------|---|----|------|------|--------------------------|---------------------------|-------------|
| gra-miR8780  | Gorai.004G198100 | 1 | 24 | 334  | 356  | UUUGAUGAUGUGGCAACAAAGCGC | UGCAGUUGUUGCCA-GUCAUUGAG  | Translation |
| gra-miR8780  | Gorai.006G206500 | 1 | 24 | 2811 | 2834 | UUUGAUGAUGUGGCAACAAAGCGC | CCUAGAUGUUUCAAUAUCAUCAGG  | Cleavage    |
| gra-miR8781a | Gorai.004G101000 | 1 | 24 | 1741 | 1764 | UAUUGAAUUAUUUAGAACUAGGAU | GGUGUGGUCGAAGGUAGUCAAUA   | Cleavage    |
| gra-miR8781b | Gorai.004G109400 | 1 | 24 | 1832 | 1855 | UUUGAUUAGGAAGUUUGAGGAUCA | GCCUGCUUGAGCUUUCUGAUUUUGA | Cleavage    |
| gra-miR8781b | Gorai.003G121600 | 1 | 24 | 192  | 214  | UUUGAUUAGGAAGUUUGAGGAUCA | UGA-CUUCGCUCUUUUUGAUCAGA  | Cleavage    |
| gra-miR8782  | Gorai.009G348900 | 1 | 21 | 2015 | 2035 | UUUGGUGUUGAAGGGGAAUAA    | ACAUGCCUCCUCAGUACCAAA     | Cleavage    |
| gra-miR8782  | Gorai.006G266700 | 1 | 21 | 1015 | 1035 | UUUGGUGUUGAAGGGGAAUAA    | AUUGUCACCUUUAUACCAAG      | Cleavage    |
| gra-miR8782  | Gorai.001G068000 | 1 | 21 | 747  | 767  | UUUGGUGUUGAAGGGGAAUAA    | UUCUUCACCUUCAAUUGCCAA     | Cleavage    |
| gra-miR8782  | Gorai.005G072800 | 1 | 21 | 1632 | 1652 | UUUGGUGUUGAAGGGGAAUAA    | UGAUUUACCUGCAAUGCCAAU     | Translation |
| gra-miR8782  | Gorai.005G259100 | 1 | 21 | 2021 | 2041 | UUUGGUGUUGAAGGGGAAUAA    | UGAAGCUACUUCAACAUCAAA     | Cleavage    |
| gra-miR8782  | Gorai.005G259100 | 1 | 21 | 1755 | 1775 | UUUGGUGUUGAAGGGGAAUAA    | CGUUCUUCUUCGACAUUGAA      | Cleavage    |
| gra-miR8784  | Gorai.003G002500 | 1 | 24 | 521  | 544  | UUUGUCGACAUGUCAGGAAAGCGC | CUGAGUUAUUGAAAUUCUGACAAA  | Cleavage    |
| gra-miR8785  | Gorai.013G236600 | 1 | 21 | 1816 | 1836 | UUUUACAGCAGCUACAUCCA     | UUGGAAGUGGCUGUUGAGAAA     | Cleavage    |
| gra-miR8785  | Gorai.001G185100 | 1 | 21 | 913  | 933  | UUUUACAGCAGCUACAUCCA     | CAGUAUGUGGCUGCUGUCAAU     | Cleavage    |
| gra-miR8785  | Gorai.006G266700 | 1 | 21 | 749  | 768  | UUUUACAGCAGCUACAUCCA     | GUGGAGG-AGCUGCAGUAAAA     | Cleavage    |
| gra-miR8785  | Gorai.009G006600 | 1 | 21 | 487  | 507  | UUUUACAGCAGCUACAUCCA     | AGGUAUGUGGAUGCUUUGAAA     | Translation |
| gra-miR8785  | Gorai.003G120400 | 1 | 21 | 748  | 768  | UUUUACAGCAGCUACAUCCA     | ACGGUUUUAGCAGCUGCAAAA     | Translation |
| gra-miR8786a | Gorai.011G138700 | 1 | 24 | 2101 | 2124 | UUUUAGUGAUGUGGCAGAAAGAUG | AAAUCAUCAGCAGCAUCACUAGAA  | Cleavage    |
| gra-miR8786b | Gorai.011G138700 | 1 | 24 | 2101 | 2124 | UUUUAGUGAUGUGGCAGAAAGAUG | AAAUCAUCAGCAGCAUCACUAGAA  | Cleavage    |
| gra-miR8787  | Gorai.011G138700 | 1 | 23 | 2146 | 2168 | UUUUCUUUUAUUGGACGAGAU    | UCAGUUGUUAAAUUGGAAGAAGA   | Cleavage    |
| gra-miR8787  | Gorai.005G035500 | 1 | 23 | 829  | 851  | UUUUCUUUUAUUGGACGAGAU    | UUUCUCGUGCCAUUAAAGGAACA   | Cleavage    |
| gra-miR8787  | Gorai.003G115800 | 1 | 23 | 995  | 1017 | UUUUCUUUUAUUGGACGAGAU    | CCUUUAGUCCAAGUAAAAGGAGC   | Translation |
| gra-miR8787  | Gorai.002G110000 | 1 | 23 | 575  | 597  | UUUUCUUUUAUUGGACGAGAU    | UACCUCGACCAAGUGACAGAAAG   | Translation |
| gra-miR8787  | Gorai.002G110000 | 1 | 23 | 3542 | 3564 | UUUUCUUUUAUUGGACGAGAU    | ACUAUGGUGCAAUUAUAGGAGGA   | Cleavage    |
| gra-miR8787  | Gorai.013G236600 | 1 | 23 | 775  | 797  | UUUUCUUUUAUUGGACGAGAU    | AGCCUUGUGCAACUAAGGGAAAAU  | Translation |
| gra-miR8787  | Gorai.005G126000 | 1 | 23 | 2191 | 2213 | UUUUCUUUUAUUGGACGAGAU    | UCAGUGGUUAAGUUGGAGGAAGA   | Cleavage    |
